# Supplementary material
Source: MDPI journal article supplement (https://www.mdpi.com/2075-163X/11/10/1090)
Supplement: s1 [file s1]

Table S11. Results of GC–MS analysis of volatiles extracted by mechanical shock crushing from quartz (Blagodatnoye deposit, Yenisei ridge).

| Formula                                    | Name                        | <sup>1</sup> CAS/(NIST) | <sup>2</sup> MW | Quartz 111/60.8      |                   |
|--------------------------------------------|-----------------------------|-------------------------|-----------------|----------------------|-------------------|
|                                            |                             |                         |                 | <sup>3</sup> RT, min | <sup>4</sup> A, % |
| Aliphatic hydrocarbons                     |                             |                         |                 |                      |                   |
| Paraffins                                  |                             |                         |                 |                      |                   |
| CH4                                        | Methane                     | 74-82-8                 | 16              | 1.61                 | 0.022             |
| C5H12                                      | n-Pentane                   | 109-66-0                | 72              | 7.75                 | 0.042             |
| C6H14                                      | 2-Methylpentane             | 107-83-5                | 86              | 8.65                 | 0.004             |
| C6H14                                      | n-Hexane                    | 110-54-3                | 86              | 12.17                | 0.012             |
| C7H16                                      | n-Heptane                   | 142-82-5                | 100             | 16.29                | 0.012             |
| C8H18                                      | n-Octane                    | 111-65-9                | 114             | 20.45                | 0.039             |
| C9H20                                      | n-Nonane                    | 111-84-2                | 128             | 24.37                | 0.031             |
| C10H22                                     | n-Decane                    | 124-18-5                | 142             | 28.00                | 0.090             |
| C11H24                                     | n-Undecane                  | 1120-21-4               | 156             | 31.37                | 0.030             |
| C12H26                                     | n-Dodecane                  | 112-40-3                | 170             | 34.56                | 0.019             |
| C13H28                                     | n-Tridecane                 | 629-50-5                | 184             | 38.87                | 0.044             |
| C14H30                                     | n-Tetradecane               | 629-59-4                | 198             | 45.49                | 0.020             |
| C15H32                                     | n-Pentadecane               | 629-62-9                | 212             | 55.89                | 0.032             |
| C16H34                                     | 5-Methylpentadecane         | 25117-33-3              | 226             | 65.85                | 0.511             |
| C16H34                                     | n-Hexadecane                | 544-76-3                | 226             | 72.73                | 0.038             |
| C17H36                                     | n-Heptadecane               | 629-78-7                | 240             | 110.52               | 0.143             |
| Olefins                                    |                             |                         |                 |                      |                   |
| C2H2                                       | Acetylene                   | 74-86-2                 | 26              | 2.08                 | 0.007             |
| C2H4                                       | Ethylene                    | 74-85-1                 | 28              | 2.36                 | 0.012             |
| C4H8                                       | 2-Butene                    | 107-01-7                | 56              | 5.94                 | 0.009             |
| C5H8                                       | 1,3-Pentadiene              | 1574-41-0               | 68              | 8.50                 | 0.018             |
| C5H8                                       | (E)-1,3-Pentadiene          | 2004-70-8               | 68              | 8.80                 | 0.001             |
| C5H8                                       | (Z)-1,3-Pentadiene          | 1574-41-0               | 68              | 9.04                 | 0.001             |
| C6H12                                      | 1-Hexene                    | 592-41-6                | 84              | 11.79                | 0.016             |
| C6H10                                      | (E)-2-Methyl-1,3-pentadiene | 926-54-5                | 82              | 12.87                | 0.005             |
| C7H14                                      | 1-Heptene                   | 592-76-7                | 98              | 15.89                | 0.009             |
| C8H16                                      | 1-Octene                    | 111-66-0                | 112             | 20.07                | 0.009             |
| C9H18                                      | 1-Nonene                    | 124-11-8                | 126             | 24.06                | 0.008             |
| C10H20                                     | 1-Decene                    | 872-05-9                | 140             | 27.73                | 0.017             |
| C11H22                                     | 1-Undecene                  | 821-95-4                | 154             | 31.12                | 0.006             |
| C12H24                                     | 1-Dodecene                  | 112-41-4                | 168             | 34.33                | 0.007             |
| C13H26                                     | 1-Tridecene                 | 2437-56-1               | 182             | 38.54                | 0.020             |
| C14H28                                     | 1-Tetradecene               | 1120-36-1               | 196             | 44.90                | 0.021             |
| C15H30                                     | 1-Pentadecene               | 13360-61-7              | 210             | 55.10                | 0.054             |
| C17H34                                     | 1-Heptadecene               | 6765-39-5               | 238             | 99.77                | 0.173             |
| Cyclic hydrocarbons                        |                             |                         |                 |                      |                   |
| Cycloalkanes (naphthenes) and cycloalkenes |                             |                         |                 |                      |                   |
| C5H10                                      | Cyclopentane                | 287-92-3                | 70              | 8.31                 | 0.010             |

|                                                |                                            |            |     |        |        |
|------------------------------------------------|--------------------------------------------|------------|-----|--------|--------|
| C <sub>10</sub> H <sub>16</sub>                | dl-Limonene                                | 138-86-3   | 136 | 28.13  | 0.010  |
| <i>Arenes</i>                                  |                                            |            |     |        |        |
| C <sub>6</sub> H <sub>6</sub>                  | Benzene                                    | 71-43-2    | 78  | 12.54  | 0.013  |
| C <sub>7</sub> H <sub>8</sub>                  | Toluene                                    | 108-88-3   | 92  | 17.06  | 0.012  |
| C <sub>7</sub> H <sub>7</sub> F                | (Fluoromethyl)benzene                      | 350-50-5   | 110 | 20.86  | 0.001  |
| C <sub>8</sub> H <sub>10</sub>                 | Ethylbenzene                               | 100-41-4   | 106 | 21.16  | 0.003  |
| C <sub>8</sub> H <sub>10</sub>                 | p-Xylene                                   | 106-42-3   | 106 | 21.30  | 0.014  |
| C <sub>8</sub> H <sub>10</sub>                 | o-Xylene                                   | 95-47-6    | 106 | 21.50  | 0.001  |
| C <sub>8</sub> H <sub>10</sub>                 | m-Xylene                                   | 108-38-3   | 106 | 21.66  | 0.002  |
| C <sub>8</sub> H <sub>8</sub>                  | Styrene                                    | 100-42-5   | 104 | 22.03  | 0.003  |
| C <sub>8</sub> H <sub>9</sub> F                | 3-Fluoro-o-xylene                          | 443-82-3   | 124 | 22.43  | <0.001 |
| C <sub>8</sub> H <sub>9</sub> F                | p-Fluoroethylbenzene                       | 459-47-2   | 124 | 23.13  | 0.004  |
| C <sub>8</sub> H <sub>9</sub> F                | 5-Fluoro-m-xylene                          | 461-97-2   | 124 | 23.28  | 0.001  |
| C <sub>9</sub> H <sub>12</sub>                 | Propylbenzene                              | 103-65-1   | 120 | 24.87  | 0.003  |
| C <sub>10</sub> H <sub>12</sub>                | (2-methyl-2-propenyl)benzene               | 3290-53-7  | 132 | 27.37  | 0.005  |
| C <sub>10</sub> H <sub>14</sub>                | Butylbenzene                               | 104-51-8   | 134 | 28.86  | 0.008  |
| C <sub>10</sub> H <sub>12</sub>                | 2-Butenylbenzene                           | 1560-06-1  | 132 | 29.26  | 0.007  |
| C <sub>15</sub> H <sub>22</sub>                | 1-(1,5-Dimethyl-4-hexenyl)-4-methylbenzene | 644-30-4   | 202 | 52.05  | 0.010  |
| C <sub>11</sub> H <sub>14</sub> O <sub>2</sub> | (Z)-1,2-Dimethoxy-4-propenylbenzene        | 6380-24-1  | 178 | 53.63  | 0.030  |
| <i>Polycyclic aromatic hydrocarbons (PAH)</i>  |                                            |            |     |        |        |
| C <sub>14</sub> H <sub>10</sub>                | Phenanthrene                               | 85-01-8    | 178 | 88.53  | 0.004  |
| <b>Oxygenated hydrocarbons</b>                 |                                            |            |     |        |        |
| <i>Alcohols</i>                                |                                            |            |     |        |        |
| CH <sub>4</sub> O                              | Methanol                                   | 67-56-1    | 32  | 4.29   | 0.350  |
| C <sub>2</sub> H <sub>6</sub> O                | Ethanol                                    | 64-17-5    | 46  | 6.15   | 0.072  |
| C <sub>3</sub> H <sub>8</sub> O                | Isopropyl Alcohol                          | 67-63-0    | 60  | 7.90   | 0.010  |
| C <sub>3</sub> H <sub>8</sub> O                | 1-Propanol                                 | 71-23-8    | 60  | 8.91   | 0.006  |
| C <sub>4</sub> H <sub>10</sub> O               | 1-Butanol                                  | 71-36-3    | 74  | 12.70  | 0.023  |
| C <sub>5</sub> H <sub>6</sub> O <sub>2</sub>   | 2-Furanmethanol                            | 98-00-0    | 98  | 19.17  | 0.005  |
| C <sub>6</sub> H <sub>6</sub> O                | Phenol                                     | 108-95-2   | 94  | 24.61  | 0.045  |
| C <sub>7</sub> H <sub>8</sub> O                | 2-Methylphenol                             | 95-48-7    | 108 | 26.13  | 0.002  |
| C <sub>7</sub> H <sub>8</sub> O                | 3-Methylphenol                             | 108-39-4   | 108 | 27.37  | 0.003  |
| C <sub>7</sub> H <sub>8</sub> O                | 4-Methylphenol                             | 106-44-5   | 108 | 28.21  | 0.016  |
| C <sub>8</sub> H <sub>10</sub> O <sub>2</sub>  | 2-Phenoxyethanol                           | 122-99-6   | 138 | 32.97  | 0.015  |
| C <sub>12</sub> H <sub>24</sub> O              | 1-Methylcycloundecanol                     | 76154-15-9 | 184 | 57.17  | 0.227  |
| C <sub>11</sub> H <sub>16</sub> O <sub>2</sub> | 4-Pentylresorcinol                         | 533-24-4   | 180 | 83.89  | 0.038  |
| C <sub>11</sub> H <sub>16</sub> O <sub>2</sub> | 5-Pentylresorcinol                         | 500-66-3   | 180 | 92.12  | 0.093  |
| C <sub>12</sub> H <sub>18</sub> O <sub>2</sub> | 2-Hexylresorcinol                          | x          | 194 | 100.17 | 0.265  |
| C <sub>12</sub> H <sub>18</sub> O <sub>2</sub> | 4-Hexylresorcinol                          | 136-77-6   | 194 | 107.70 | 0.236  |
| C <sub>12</sub> H <sub>18</sub> O <sub>2</sub> | 5-Hexylresorcinol                          | x          | 194 | 117.92 | 0.082  |
| <i>Ethers and esters</i>                       |                                            |            |     |        |        |
| C <sub>5</sub> H <sub>8</sub> O <sub>2</sub>   | Methyl methacrylate                        | 80-62-6    | 100 | 14.43  | 0.005  |

|                                                |                                             |            |     |        |       |
|------------------------------------------------|---------------------------------------------|------------|-----|--------|-------|
| C <sub>5</sub> H <sub>8</sub> O                | 3,4-Dihydro-2H-pyran                        | 110-87-2   | 84  | 16.64  | 0.014 |
| C <sub>4</sub> H <sub>6</sub> O <sub>2</sub>   | Butyrolactone                               | 96-48-0    | 86  | 20.42  | 0.006 |
| C <sub>6</sub> H <sub>10</sub> O <sub>2</sub>  | γ-Hexalactone                               | 695-06-7   | 114 | 27.17  | 0.006 |
| C <sub>6</sub> H <sub>10</sub> O <sub>2</sub>  | δ-Hexalactone                               | 823-22-3   | 114 | 29.88  | 0.031 |
| C <sub>8</sub> H <sub>14</sub> O <sub>2</sub>  | γ-Octalactone                               | 104-50-7   | 142 | 34.36  | 0.010 |
| C <sub>9</sub> H <sub>16</sub> O <sub>2</sub>  | γ-Nonalactone                               | 104-61-0   | 156 | 38.92  | 0.014 |
| C <sub>10</sub> H <sub>18</sub> O <sub>2</sub> | γ-Decalactone                               | 706-14-9   | 170 | 45.87  | 0.009 |
| C <sub>12</sub> H <sub>14</sub> O <sub>4</sub> | Diethyl Phthalate                           | 84-66-2    | 222 | 69.53  | 0.032 |
| C <sub>12</sub> H <sub>22</sub> O <sub>2</sub> | γ-Dodecalactone                             | 2305-05-7  | 198 | 74.66  | 0.018 |
| C <sub>15</sub> H <sub>30</sub> O <sub>2</sub> | 3-Methylbutyl ester pentadecanoic acid      | 2306-91-4  | 242 | 86.90  | 1.434 |
| C <sub>16</sub> H <sub>30</sub> O <sub>4</sub> | Di(2-methylpent-3-yl) ester succinic acid   | (349400)   | 286 | 116.57 | 0.060 |
| C <sub>14</sub> H <sub>18</sub> O <sub>4</sub> | Dipropyl ester 1,2-benzenedicarboxylic acid | 131-16-8   | 250 | 127.73 | 1.051 |
| <i>Aldehydes</i>                               |                                             |            |     |        |       |
| C <sub>2</sub> H <sub>4</sub> O                | Acetaldehyde                                | 75-07-0    | 44  | 4.76   | 0.366 |
| C <sub>3</sub> H <sub>4</sub> O                | 2-Propenal                                  | 107-02-8   | 56  | 7.10   | 0.011 |
| C <sub>3</sub> H <sub>6</sub> O                | n-Propanal                                  | 123-38-6   | 58  | 7.37   | 0.036 |
| C <sub>4</sub> H <sub>6</sub> O                | 2-Methyl-2-propenal                         | 78-85-3    | 70  | 9.54   | 0.013 |
| C <sub>4</sub> H <sub>8</sub> O                | 2-Methylpropanal                            | 78-84-2    | 72  | 9.61   | 0.005 |
| C <sub>4</sub> H <sub>8</sub> O                | n-Butanal                                   | 123-72-8   | 72  | 10.39  | 0.003 |
| C <sub>5</sub> H <sub>10</sub> O               | 3-Methylbutanal                             | 590-86-3   | 86  | 13.57  | 0.026 |
| C <sub>5</sub> H <sub>10</sub> O               | n-Pentanal                                  | 110-62-3   | 86  | 14.58  | 0.017 |
| C <sub>5</sub> H <sub>4</sub> O <sub>2</sub>   | Furfural                                    | 98-01-1    | 96  | 17.16  | 0.002 |
| C <sub>5</sub> H <sub>4</sub> O <sub>2</sub>   | 3-Furaldehyde                               | 498-60-2   | 96  | 18.01  | 0.028 |
| C <sub>6</sub> H <sub>12</sub> O               | n-Hexanal                                   | 66-25-1    | 100 | 18.97  | 0.025 |
| C <sub>7</sub> H <sub>14</sub> O               | n-Heptanal                                  | 111-71-7   | 114 | 23.16  | 0.035 |
| C <sub>7</sub> H <sub>6</sub> O                | Benzaldehyde                                | 100-52-7   | 106 | 23.91  | 0.040 |
| C <sub>8</sub> H <sub>16</sub> O               | 2-Ethylhexanal                              | 123-05-7   | 128 | 25.69  | 0.014 |
| C <sub>8</sub> H <sub>16</sub> O               | n-Octanal                                   | 124-13-0   | 128 | 27.05  | 0.038 |
| C <sub>6</sub> H <sub>4</sub> O <sub>3</sub>   | 2,5-Furandicarboxaldehyde                   | 823-82-5   | 124 | 27.32  | 0.012 |
| C <sub>9</sub> H <sub>18</sub> O               | n-Nonanal                                   | 124-19-6   | 142 | 30.44  | 0.090 |
| C <sub>10</sub> H <sub>20</sub> O              | n-Decanal                                   | 112-31-2   | 156 | 33.90  | 0.109 |
| C <sub>11</sub> H <sub>22</sub> O              | n-Undecanal                                 | 112-44-7   | 170 | 37.99  | 0.249 |
| C <sub>12</sub> H <sub>24</sub> O              | n-Dodecanal                                 | 112-54-9   | 184 | 44.21  | 0.030 |
| C <sub>13</sub> H <sub>26</sub> O              | n-Tridecanal                                | 10486-19-8 | 198 | 54.01  | 0.042 |
| C <sub>14</sub> H <sub>28</sub> O              | n-Tetradecanal                              | 124-25-4   | 212 | 69.92  | 0.070 |
| C <sub>15</sub> H <sub>30</sub> O              | n-Pentadecanal                              | 2765-11-9  | 226 | 95.46  | 0.147 |
| <i>Ketones</i>                                 |                                             |            |     |        |       |
| C <sub>3</sub> H <sub>6</sub> O                | 2-Propanone                                 | 67-64-1    | 58  | 7.43   | 0.031 |
| C <sub>4</sub> H <sub>6</sub> O                | 2-Butenone                                  | 78-94-4    | 70  | 10.11  | 0.009 |
| C <sub>4</sub> H <sub>6</sub> O <sub>2</sub>   | 2,3-Butanedione                             | 431-03-8   | 86  | 10.49  | 0.096 |
| C <sub>4</sub> H <sub>8</sub> O                | 2-Butanone                                  | 78-93-3    | 72  | 10.52  | 0.004 |

|                                                |                                    |            |     |        |        |
|------------------------------------------------|------------------------------------|------------|-----|--------|--------|
| C <sub>5</sub> H <sub>10</sub> O               | 2-Pentanone                        | 107-87-9   | 86  | 14.33  | 0.013  |
| C <sub>3</sub> H <sub>6</sub> O <sub>2</sub>   | 1-Hydroxy- 2-propanone             | 116-09-6   | 74  | 16.03  | 0.008  |
| C <sub>5</sub> H <sub>8</sub> O                | Cyclopentanone                     | 120-92-3   | 84  | 16.89  | 0.011  |
| C <sub>6</sub> H <sub>12</sub> O               | 2-Hexanone                         | 591-78-6   | 100 | 18.70  | 0.015  |
| C <sub>7</sub> H <sub>14</sub> O               | 2-Heptanone                        | 110-43-0   | 114 | 22.86  | 0.017  |
| C <sub>5</sub> H <sub>8</sub> O <sub>2</sub>   | 3-Methyldihydro-2(3H)-furanone     | 1679-47-6  | 100 | 26.17  | 0.045  |
| C <sub>8</sub> H <sub>16</sub> O               | 2-Octanone                         | 111-13-7   | 128 | 26.72  | 0.048  |
| C <sub>8</sub> H <sub>14</sub> O <sub>2</sub>  | 6-Methyl-2,4-heptanedione          | 3002-23-1  | 142 | 29.78  | 0.005  |
| C <sub>9</sub> H <sub>18</sub> O               | 2-Nonanone                         | 821-55-6   | 142 | 30.27  | 0.044  |
| C <sub>8</sub> H <sub>14</sub> O <sub>2</sub>  | 2,4-Octanedione                    | 14090-87-0 | 142 | 30.86  | 0.014  |
| C <sub>9</sub> H <sub>10</sub> O               | 1-(2-Methylphenyl)-ethanone        | 577-16-2   | 134 | 32.07  | 0.008  |
| C <sub>10</sub> H <sub>20</sub> O              | 2-Decanone                         | 693-54-9   | 156 | 33.55  | 0.052  |
| C <sub>8</sub> H <sub>4</sub> O <sub>3</sub>   | 1,3-Isobenzofurandione             | 85-44-9    | 148 | 35.46  | 0.036  |
| C <sub>11</sub> H <sub>22</sub> O              | 2-Undecanone                       | 53452-70-3 | 170 | 37.46  | 0.050  |
| C <sub>12</sub> H <sub>24</sub> O              | 2-Dodecanone                       | 6175-49-1  | 184 | 43.39  | 0.036  |
| C <sub>13</sub> H <sub>22</sub> O              | 6,10-Dimethyl-5,9-undecadien-2-one | 689-67-8   | 194 | 47.93  | 0.031  |
| C <sub>13</sub> H <sub>26</sub> O              | 2-Tridecanone                      | 593-08-8   | 198 | 52.75  | 0.039  |
| C <sub>14</sub> H <sub>28</sub> O              | 2-Tetradecanone                    | 2345-27-9  | 212 | 67.53  | 0.044  |
| C <sub>15</sub> H <sub>30</sub> O              | 2-Pentadecanone                    | 2345-28-0  | 226 | 91.69  | 0.175  |
| <i>Carboxylic acids</i>                        |                                    |            |     |        |        |
| C <sub>2</sub> H <sub>4</sub> O <sub>2</sub>   | Acetic acid                        | 64-19-7    | 60  | 11.22  | 0.292  |
| C <sub>3</sub> H <sub>6</sub> O <sub>2</sub>   | n-Propanoic acid                   | 79-09-4    | 74  | 15.49  | 0.008  |
| C <sub>4</sub> H <sub>8</sub> O <sub>2</sub>   | n-Butanoic acid                    | 107-92-6   | 88  | 19.14  | 0.069  |
| C <sub>5</sub> H <sub>10</sub> O <sub>2</sub>  | 3-Methylbutanoic acid              | 503-74-2   | 102 | 22.19  | 0.027  |
| C <sub>5</sub> H <sub>10</sub> O <sub>2</sub>  | n-Pentanoic acid                   | 109-52-4   | 102 | 23.18  | 0.036  |
| C <sub>6</sub> H <sub>12</sub> O <sub>2</sub>  | n-Hexanoic acid                    | 142-62-1   | 116 | 26.70  | 0.149  |
| C <sub>7</sub> H <sub>14</sub> O <sub>2</sub>  | n-Heptanoic acid                   | 111-14-8   | 130 | 30.22  | 0.042  |
| C <sub>8</sub> H <sub>16</sub> O <sub>2</sub>  | n-Octanoic acid                    | 124-07-2   | 144 | 33.38  | 0.083  |
| C <sub>9</sub> H <sub>18</sub> O <sub>2</sub>  | n-Nonanoic acid                    | 112-05-0   | 158 | 37.09  | 0.125  |
| C <sub>10</sub> H <sub>20</sub> O <sub>2</sub> | n-Decanoic acid                    | 334-48-5   | 172 | 43.13  | 0.059  |
| C <sub>11</sub> H <sub>22</sub> O <sub>2</sub> | n-Undecanoic acid                  | 112-37-8   | 186 | 52.77  | <0.001 |
| C <sub>12</sub> H <sub>24</sub> O <sub>2</sub> | n-Dodecanoic acid                  | 143-07-7   | 200 | 67.30  | 0.078  |
| C <sub>14</sub> H <sub>28</sub> O <sub>2</sub> | n-Tetradecanoic acid               | 544-63-8   | 228 | 125.34 | 0.190  |
| <b>Heterocyclic compounds</b>                  |                                    |            |     |        |        |
| <i>Dioxanes</i>                                |                                    |            |     |        |        |
| C <sub>4</sub> H <sub>8</sub> O <sub>2</sub>   | 1,4-Dioxane                        | 123-91-1   | 88  | 13.50  | 0.001  |
| <i>Furans</i>                                  |                                    |            |     |        |        |
| C <sub>5</sub> H <sub>6</sub> O                | 2-Methylfuran                      | 534-22-5   | 82  | 10.27  | 0.001  |
| C <sub>6</sub> H <sub>6</sub> O                | 2-Vinylfuran                       | 1487-18-9  | 94  | 14.93  | 0.001  |
| C <sub>9</sub> H <sub>14</sub> O               | 2-Pentylfuran                      | 3777-69-3  | 138 | 26.30  | 0.005  |
| <b>Nitrogenated compounds</b>                  |                                    |            |     |        |        |

|                                               |                         |           |     |       |        |
|-----------------------------------------------|-------------------------|-----------|-----|-------|--------|
| N <sub>2</sub>                                | Nitrogen                | 7727-37-9 | 28  | 1.55  | 0.748  |
| H <sub>3</sub> N                              | Ammonia                 | 7664-41-7 | 17  | 2.61  | 0.091  |
| C <sub>2</sub> H <sub>3</sub> N               | Acetonitrile            | 75-05-8   | 41  | 6.50  | 0.054  |
| C <sub>3</sub> H <sub>5</sub> N               | Propargylamine          | 2450-71-7 | 55  | 9.19  | 0.001  |
| C <sub>4</sub> H <sub>5</sub> N               | Pyrrole                 | 109-97-7  | 67  | 14.38 | 0.022  |
| C <sub>5</sub> H <sub>7</sub> N               | 3-Methyl-1H-pyrrole     | 616-43-3  | 81  | 14.93 | 0.002  |
| C <sub>2</sub> H <sub>5</sub> NO              | Acetamide               | 60-35-5   | 59  | 15.06 | 0.066  |
| C <sub>5</sub> H <sub>5</sub> N               | Pyridine                | 110-86-1  | 79  | 15.11 | 0.005  |
| C <sub>3</sub> H <sub>5</sub> NO <sub>2</sub> | 2-Oxo-propionamide      | x         | 87  | 17.02 | 0.054  |
| C <sub>6</sub> H <sub>9</sub> N               | 2,3-Dimethyl-1H-pyrrole | 600-28-2  | 95  | 18.20 | 0.002  |
| C <sub>6</sub> H <sub>7</sub> N               | 2-Methylpyridine        | 109-06-8  | 93  | 18.54 | 0.002  |
| C <sub>6</sub> H <sub>7</sub> N               | 3-Methylpyridine        | 108-99-6  | 93  | 20.18 | 0.004  |
| C <sub>6</sub> H <sub>7</sub> N               | 4-Methylpyridine        | 108-89-4  | 93  | 20.93 | 0.002  |
| C <sub>3</sub> H <sub>4</sub> N <sub>2</sub>  | 1H-Pyrazole             | 288-13-1  | 68  | 22.48 | 0.017  |
| C <sub>5</sub> H <sub>11</sub> NO             | 3-Methylbutanamide      | 541-46-8  | 101 | 23.01 | 0.005  |
| C <sub>5</sub> H <sub>11</sub> NO             | Pentanamide             | 626-97-1  | 101 | 25.87 | 0.012  |
| C <sub>4</sub> H <sub>7</sub> NO              | 2-Pyrrolidinone         | 616-45-5  | 85  | 26.02 | 0.016  |
| C <sub>4</sub> H <sub>5</sub> NO <sub>2</sub> | Succinimide             | 123-56-8  | 99  | 28.30 | 0.021  |
| <b>Sulfonated compounds</b>                   |                         |           |     |       |        |
| H <sub>2</sub> S                              | Hydrogen sulfide        | 7783-06-4 | 34  | 3.03  | 0.004  |
| COS                                           | Carbonyl sulfide        | 463-58-1  | 60  | 3.56  | 0.002  |
| O <sub>2</sub> S                              | Sulfur dioxide          | 7446-09-5 | 64  | 5.02  | 0.047  |
| CH <sub>4</sub> S                             | Methanethiol            | 74-93-1   | 48  | 5.44  | 0.024  |
| C <sub>2</sub> H <sub>6</sub> S               | Dimethyl sulfide        | 75-18-3   | 62  | 7.71  | 0.001  |
| CS <sub>2</sub>                               | Carbon disulfide        | 75-15-0   | 76  | 7.78  | 0.001  |
| C <sub>2</sub> H <sub>6</sub> S <sub>2</sub>  | Dimethyl disulfide      | 624-92-0  | 94  | 15.26 | 0.002  |
| <b>Inorganic compounds</b>                    |                         |           |     |       |        |
| <i>Oxides</i>                                 |                         |           |     |       |        |
| CO <sub>2</sub>                               | Carbon dioxide          | 124-38-9  | 44  | 1.81  | 5.495  |
| H <sub>2</sub> O                              | Water                   | 7732-18-5 | 18  | 2.99  | 84.096 |
| <i>Noble gases</i>                            |                         |           |     |       |        |
| Ar                                            | Argon                   | 7440-37-1 | 40  | 1.55  | 0.005  |

Note: <sup>1</sup>CAS/(NIST) – unique numerical identifier of chemical compounds included in the register Chemical Abstracts Service (<https://www.cas.org>) or NIST number (a unique number given to each spectrum in the NIST archive); <sup>2</sup>MW – nominal mass; <sup>3</sup>RT – retention time; <sup>4</sup>A – normalized area (the area ratio of the individual gas mixture components to the sum of the areas of all the components in the chromatogram).
