# Supplementary material
Source: MDPI journal article supplement (https://www.mdpi.com/2075-163X/11/10/1090)
Supplement: s1 [file s1]

Table S1. Results of GC–MS analysis of volatiles extracted by mechanical shock crushing from quartz (Blagodatnoye deposit, Yenisei ridge).

| Formula                                    | Name                        | <sup>1</sup> CAS/(NIST) | <sup>2</sup> MW | Quartz 111/90.3      |                   |
|--------------------------------------------|-----------------------------|-------------------------|-----------------|----------------------|-------------------|
|                                            |                             |                         |                 | <sup>3</sup> RT, min | <sup>4</sup> A, % |
| Aliphatic hydrocarbons                     |                             |                         |                 |                      |                   |
| Paraffins                                  |                             |                         |                 |                      |                   |
| CH4                                        | Methane                     | 74-82-8                 | 16              | 1.58                 | 1.109             |
| C2H6                                       | Ethane                      | 74-84-0                 | 30              | 2.31                 | 0.028             |
| C5H12                                      | n-Pentane                   | 109-66-0                | 72              | 7.61                 | 0.001             |
| C6H14                                      | 2-Methylpentane             | 107-83-5                | 86              | 8.58                 | 0.002             |
| C6H14                                      | n-Hexane                    | 110-54-3                | 86              | 12.07                | 0.002             |
| C7H16                                      | n-Heptane                   | 142-82-5                | 100             | 16.18                | 0.003             |
| C8H18                                      | n-Octane                    | 111-65-9                | 114             | 20.33                | 0.007             |
| C9H20                                      | n-Nonane                    | 111-84-2                | 128             | 24.26                | 0.010             |
| C10H22                                     | n-Decane                    | 124-18-5                | 142             | 27.88                | 0.016             |
| C11H24                                     | n-Undecane                  | 1120-21-4               | 156             | 31.24                | 0.004             |
| C12H26                                     | n-Dodecane                  | 112-40-3                | 170             | 34.43                | 0.005             |
| C13H28                                     | n-Tridecane                 | 629-50-5                | 184             | 38.64                | 0.010             |
| C14H30                                     | n-Tetradecane               | 629-59-4                | 198             | 45.10                | 0.010             |
| C15H32                                     | 3-Methyltetradecane         | 18435-22-8              | 212             | 53.38                | 0.017             |
| C15H32                                     | n-Pentadecane               | 629-62-9                | 212             | 55.36                | 0.010             |
| C16H34                                     | n-Hexadecane                | 544-76-3                | 226             | 71.72                | 0.034             |
| Olefins                                    |                             |                         |                 |                      |                   |
| C2H4                                       | Ethylene                    | 74-85-1                 | 28              | 2.11                 | 0.003             |
| C4H8                                       | 2-Methyl-1-propene          | 115-11-7                | 56              | 5.70                 | 0.001             |
| C4H8                                       | 2-Butene                    | 107-01-7                | 56              | 5.87                 | 0.003             |
| C5H8                                       | 1,3-Pentadiene              | 1574-41-0               | 68              | 8.45                 | 0.004             |
| C5H8                                       | (E)-1,3-Pentadiene          | 2004-70-8               | 68              | 8.63                 | 0.001             |
| C5H8                                       | (Z)-1,3-Pentadiene          | 1574-41-0               | 68              | 8.94                 | 0.001             |
| C6H12                                      | 1-Hexene                    | 592-41-6                | 84              | 11.69                | 0.005             |
| C6H10                                      | (E)-2-Methyl-1,3-pentadiene | 926-54-5                | 82              | 12.74                | 0.001             |
| C7H14                                      | 1-Heptene                   | 592-76-7                | 98              | 15.79                | 0.004             |
| C8H16                                      | 1-Octene                    | 111-66-0                | 112             | 19.98                | 0.002             |
| C9H18                                      | 1-Nonene                    | 124-11-8                | 126             | 23.94                | 0.004             |
| C10H20                                     | 1-Decene                    | 872-05-9                | 140             | 27.61                | 0.005             |
| C11H22                                     | 1-Undecene                  | 821-95-4                | 154             | 31.01                | 0.004             |
| C12H24                                     | 1-Dodecene                  | 112-41-4                | 168             | 34.16                | 0.004             |
| C13H26                                     | 1-Tridecene                 | 2437-56-1               | 182             | 38.27                | 0.006             |
| C14H28                                     | 1-Tetradecene               | 1120-36-1               | 196             | 44.57                | 0.011             |
| C15H30                                     | 1-Pentadecene               | 13360-61-7              | 210             | 54.56                | 0.013             |
| Cyclic hydrocarbons                        |                             |                         |                 |                      |                   |
| Cycloalkanes (naphthenes) and cycloalkenes |                             |                         |                 |                      |                   |
| C5H10                                      | Cyclopentane                | 287-92-3                | 70              | 8.25                 | 0.003             |
| C10H16                                     | dl-Limonene                 | 138-86-3                | 136             | 28.00                | 0.002             |

|                                                |                                                     |           |     |        |        |
|------------------------------------------------|-----------------------------------------------------|-----------|-----|--------|--------|
| <i>Arenes</i>                                  |                                                     |           |     |        |        |
| C <sub>6</sub> H <sub>6</sub>                  | Benzene                                             | 71-43-2   | 78  | 12.40  | 0.004  |
| C <sub>7</sub> H <sub>8</sub>                  | Toluene                                             | 108-88-3  | 92  | 16.92  | 0.003  |
| C <sub>7</sub> H <sub>7</sub> F                | (Fluoromethyl)benzene                               | 350-50-5  | 110 | 20.73  | <0.001 |
| C <sub>8</sub> H <sub>10</sub>                 | Ethylbenzene                                        | 100-41-4  | 106 | 21.01  | 0.001  |
| C <sub>8</sub> H <sub>10</sub>                 | p-Xylene                                            | 106-42-3  | 106 | 21.30  | 0.002  |
| C <sub>8</sub> H <sub>10</sub>                 | o-Xylene                                            | 95-47-6   | 106 | 21.58  | 0.001  |
| C <sub>8</sub> H <sub>10</sub>                 | m-Xylene                                            | 108-38-3  | 106 | 21.86  | 0.001  |
| C <sub>8</sub> H <sub>8</sub>                  | Styrene                                             | 100-42-5  | 104 | 21.90  | 0.001  |
| C <sub>8</sub> H <sub>9</sub> F                | 3-Fluoro-o-xylene                                   | 443-82-3  | 124 | 22.28  | <0.001 |
| C <sub>8</sub> H <sub>9</sub> F                | 5-Fluoro-m-xylene                                   | 461-97-2  | 124 | 22.64  | <0.001 |
| C <sub>8</sub> H <sub>9</sub> F                | p-Fluoroethylbenzene                                | 459-47-2  | 124 | 22.91  | 0.001  |
| C <sub>9</sub> H <sub>12</sub>                 | Propylbenzene                                       | 103-65-1  | 120 | 24.87  | 0.002  |
| C <sub>10</sub> H <sub>12</sub>                | (2-Methyl-2-propenyl)benzene                        | 3290-53-7 | 132 | 27.17  | 0.004  |
| C <sub>10</sub> H <sub>14</sub>                | Butylbenzene                                        | 104-51-8  | 134 | 28.73  | 0.001  |
| C <sub>12</sub> H <sub>18</sub>                | Hexylbenzene                                        | 1077-16-3 | 162 | 36.26  | 0.006  |
| <b>Oxygenated hydrocarbons</b>                 |                                                     |           |     |        |        |
| <i>Alcohols</i>                                |                                                     |           |     |        |        |
| CH <sub>4</sub> O                              | Methanol                                            | 67-56-1   | 32  | 4.29   | 0.167  |
| C <sub>2</sub> H <sub>6</sub> O                | Ethanol                                             | 64-17-5   | 46  | 6.23   | 0.019  |
| C <sub>3</sub> H <sub>8</sub> O                | Isopropyl Alcohol                                   | 67-63-0   | 60  | 7.78   | 0.006  |
| C <sub>4</sub> H <sub>10</sub> O               | 1-Butanol                                           | 71-36-3   | 74  | 12.57  | 0.006  |
| C <sub>5</sub> H <sub>6</sub> O <sub>2</sub>   | 2-Furanmethanol                                     | 98-00-0   | 98  | 18.99  | 0.001  |
| C <sub>6</sub> H <sub>6</sub> O                | Phenol                                              | 108-95-2  | 94  | 24.44  | 0.009  |
| C <sub>7</sub> H <sub>8</sub> O                | 2-Methylphenol                                      | 95-48-7   | 108 | 25.95  | 0.001  |
| C <sub>7</sub> H <sub>8</sub> O                | 3-Methylphenol                                      | 108-39-4  | 108 | 27.20  | 0.001  |
| C <sub>7</sub> H <sub>8</sub> O                | 4-Methylphenol                                      | 106-44-5  | 108 | 28.03  | 0.003  |
| C <sub>8</sub> H <sub>10</sub> O <sub>2</sub>  | 2-Phenoxyethanol                                    | 122-99-6  | 138 | 32.80  | 0.001  |
| <i>Ethers and esters</i>                       |                                                     |           |     |        |        |
| C <sub>5</sub> H <sub>8</sub> O <sub>2</sub>   | Methyl methacrylate                                 | 80-62-6   | 100 | 14.28  | 0.002  |
| C <sub>5</sub> H <sub>8</sub> O                | 3,4-Dihydro-2H-pyran                                | 110-87-2  | 84  | 16.44  | 0.003  |
| C <sub>4</sub> H <sub>6</sub> O <sub>2</sub>   | Butyrolactone                                       | 96-48-0   | 86  | 20.13  | 0.003  |
| C <sub>6</sub> H <sub>10</sub> O <sub>2</sub>  | γ-Hexalactone                                       | 695-06-7  | 114 | 26.92  | 0.002  |
| C <sub>6</sub> H <sub>10</sub> O <sub>2</sub>  | Tetrahydro-6-methyl-2H-pyran-2-one                  | 823-22-3  | 114 | 29.61  | 0.010  |
| C <sub>7</sub> H <sub>12</sub> O <sub>2</sub>  | γ-Heptalactone                                      | 105-21-5  | 128 | 30.62  | 0.001  |
| C <sub>8</sub> H <sub>14</sub> O <sub>2</sub>  | γ-Octalactone                                       | 104-50-7  | 142 | 34.11  | 0.002  |
| C <sub>9</sub> H <sub>16</sub> O <sub>2</sub>  | γ-Nonalactone                                       | 104-61-0  | 156 | 38.54  | 0.004  |
| C <sub>10</sub> H <sub>18</sub> O <sub>2</sub> | γ-Decalactone                                       | 706-14-9  | 170 | 45.30  | 0.004  |
| C <sub>11</sub> H <sub>20</sub> O <sub>2</sub> | γ-Undecalatone                                      | 104-67-6  | 184 | 50.04  | 0.054  |
| C <sub>12</sub> H <sub>22</sub> O <sub>2</sub> | γ-Dodecalactone                                     | 2305-05-7 | 198 | 73.20  | 0.005  |
| C <sub>15</sub> H <sub>28</sub> O <sub>4</sub> | 3-Methylbut-2-yl 3-methylpentyl ester succinic acid | (390641)  | 272 | 101.06 | 0.003  |
| C <sub>14</sub> H <sub>18</sub> O <sub>4</sub> | Dipropyl phthalate                                  | 131-16-8  | 250 | 131.92 | 0.026  |

|                                               |                                 |            |     |       |        |
|-----------------------------------------------|---------------------------------|------------|-----|-------|--------|
| <i>Aldehydes</i>                              |                                 |            |     |       |        |
| C <sub>2</sub> H <sub>4</sub> O               | Acetaldehyde                    | 75-07-0    | 44  | 5.07  | 0.134  |
| C <sub>3</sub> H <sub>4</sub> O               | 2-Propenal                      | 107-02-8   | 56  | 6.98  | 0.003  |
| C <sub>3</sub> H <sub>6</sub> O               | n-Propanal                      | 123-38-6   | 58  | 7.28  | 0.007  |
| C <sub>4</sub> H <sub>6</sub> O               | 2-Methyl-2-propenal             | 78-85-3    | 70  | 9.39  | 0.001  |
| C <sub>4</sub> H <sub>8</sub> O               | 2-methylpropanal                | 78-84-2    | 72  | 9.49  | 0.002  |
| C <sub>4</sub> H <sub>8</sub> O               | n-Butanal                       | 123-72-8   | 72  | 10.26 | 0.001  |
| C <sub>5</sub> H <sub>10</sub> O              | 3-Methylbutanal                 | 590-86-3   | 86  | 13.42 | 0.007  |
| C <sub>5</sub> H <sub>10</sub> O              | n-Pentanal                      | 110-62-3   | 86  | 14.41 | 0.004  |
| C <sub>5</sub> H <sub>4</sub> O <sub>2</sub>  | Furfural                        | 98-01-1    | 96  | 16.96 | <0.001 |
| C <sub>5</sub> H <sub>4</sub> O <sub>2</sub>  | 3-Furaldehyde                   | 498-60-2   | 96  | 17.79 | 0.006  |
| C <sub>6</sub> H <sub>12</sub> O              | n-Hexanal                       | 66-25-1    | 100 | 18.80 | 0.007  |
| C <sub>7</sub> H <sub>14</sub> O              | n-Heptanal                      | 111-71-7   | 114 | 22.99 | 0.010  |
| C <sub>7</sub> H <sub>6</sub> O               | Benzaldehyde                    | 100-52-7   | 106 | 23.71 | 0.015  |
| C <sub>8</sub> H <sub>16</sub> O              | 2-Ethylhexanal                  | 123-05-7   | 128 | 25.54 | 0.004  |
| C <sub>8</sub> H <sub>16</sub> O              | n-Octanal                       | 124-13-0   | 128 | 26.88 | 0.215  |
| C <sub>9</sub> H <sub>18</sub> O              | n-Nonanal                       | 124-19-6   | 142 | 30.44 | 0.024  |
| C <sub>10</sub> H <sub>20</sub> O             | n-Decanal                       | 112-31-2   | 156 | 33.73 | 0.025  |
| C <sub>11</sub> H <sub>22</sub> O             | n-Undecanal                     | 112-44-7   | 170 | 37.77 | 0.010  |
| C <sub>12</sub> H <sub>24</sub> O             | n-Dodecanal                     | 112-54-9   | 184 | 43.86 | 0.006  |
| C <sub>13</sub> H <sub>26</sub> O             | n-Tridecanal                    | 10486-19-8 | 198 | 53.62 | 0.009  |
| C <sub>14</sub> H <sub>28</sub> O             | n-Tetradecanal                  | 124-25-4   | 212 | 68.79 | 0.010  |
| C <sub>15</sub> H <sub>30</sub> O             | n-Pentadecanal                  | 2765-11-9  | 226 | 93.85 | 0.018  |
| <i>Ketones</i>                                |                                 |            |     |       |        |
| C <sub>3</sub> H <sub>6</sub> O               | 2-Propanone                     | 67-64-1    | 58  | 7.32  | 0.012  |
| C <sub>4</sub> H <sub>6</sub> O               | 2-Butenone                      | 78-94-4    | 70  | 9.96  | 0.001  |
| C <sub>4</sub> H <sub>6</sub> O <sub>2</sub>  | 2,3-Butanedione                 | 431-03-8   | 86  | 10.34 | 0.001  |
| C <sub>4</sub> H <sub>8</sub> O               | 2-Butanone                      | 78-93-3    | 72  | 10.37 | 0.002  |
| C <sub>5</sub> H <sub>10</sub> O              | 2-Pentanone                     | 107-87-9   | 86  | 14.16 | 0.004  |
| C <sub>5</sub> H <sub>8</sub> O               | Cyclopentanone                  | 120-92-3   | 84  | 16.69 | 0.001  |
| C <sub>6</sub> H <sub>12</sub> O              | 2-Hexanone                      | 591-78-6   | 100 | 18.52 | 0.003  |
| C <sub>7</sub> H <sub>14</sub> O              | 2-Heptanone                     | 110-43-0   | 114 | 22.71 | 0.004  |
| C <sub>5</sub> H <sub>6</sub> O <sub>3</sub>  | Dihydro-3-methyl-2,5-furandione | 4100-80-5  | 114 | 25.90 | 0.014  |
| C <sub>8</sub> H <sub>16</sub> O              | 2-Octanone                      | 111-13-7   | 128 | 26.57 | 0.015  |
| C <sub>8</sub> H <sub>14</sub> O <sub>2</sub> | 6-methyl-2,4-heptanedione       | 3002-23-1  | 142 | 29.51 | 0.001  |
| C <sub>9</sub> H <sub>18</sub> O              | 2-Nonanone                      | 821-55-6   | 142 | 30.11 | 0.014  |
| C <sub>10</sub> H <sub>20</sub> O             | 2-Decanone                      | 693-54-9   | 156 | 33.38 | 0.006  |
| C <sub>8</sub> H <sub>4</sub> O <sub>3</sub>  | 1,3-Isobenzofurandione          | 85-44-9    | 148 | 35.13 | 0.068  |
| C <sub>11</sub> H <sub>22</sub> O             | 2-Undecanone                    | 53452-70-3 | 170 | 37.19 | 0.006  |
| C <sub>12</sub> H <sub>24</sub> O             | 2-Dodecanone                    | 6175-49-1  | 184 | 42.98 | 0.004  |
| C <sub>13</sub> H <sub>26</sub> O             | 3-Tridecanone                   | 1534-26-5  | 198 | 47.53 | 0.006  |
| C <sub>13</sub> H <sub>26</sub> O             | 2-Tridecanone                   | 593-08-8   | 198 | 52.02 | 0.013  |
| C <sub>14</sub> H <sub>28</sub> O             | 3-Tetradecanone                 | 629-23-2   | 212 | 62.91 | 0.043  |

|                                                |                            |           |     |        |        |
|------------------------------------------------|----------------------------|-----------|-----|--------|--------|
| C <sub>14</sub> H <sub>28</sub> O              | 2-Tetradecanone            | 2345-27-9 | 212 | 66.55  | 0.021  |
| C <sub>15</sub> H <sub>30</sub> O              | 2-Pentadecanone            | 2345-28-0 | 226 | 90.17  | 0.055  |
| <i>Carboxylic acids</i>                        |                            |           |     |        |        |
| C <sub>2</sub> H <sub>4</sub> O <sub>2</sub>   | Acetic acid                | 64-19-7   | 60  | 11.14  | 0.182  |
| C <sub>3</sub> H <sub>6</sub> O <sub>2</sub>   | n-Propanoic acid           | 79-09-4   | 74  | 15.46  | 0.004  |
| C <sub>4</sub> H <sub>8</sub> O <sub>2</sub>   | n-Butanoic acid            | 107-92-6  | 88  | 19.12  | 0.022  |
| C <sub>5</sub> H <sub>10</sub> O <sub>2</sub>  | 3-Methylbutanoic acid      | 503-74-2  | 102 | 22.16  | 0.006  |
| C <sub>5</sub> H <sub>10</sub> O <sub>2</sub>  | n-Pentanoic acid           | 109-52-4  | 102 | 23.11  | 0.014  |
| C <sub>6</sub> H <sub>12</sub> O <sub>2</sub>  | n-Hexanoic acid            | 142-62-1  | 116 | 26.60  | 0.048  |
| C <sub>7</sub> H <sub>14</sub> O <sub>2</sub>  | n-Heptanoic acid           | 111-14-8  | 130 | 30.13  | 0.020  |
| C <sub>8</sub> H <sub>16</sub> O <sub>2</sub>  | n-Octanoic acid            | 124-07-2  | 144 | 33.23  | 0.037  |
| C <sub>9</sub> H <sub>18</sub> O <sub>2</sub>  | n-Nonanoic acid            | 112-05-0  | 158 | 36.84  | 0.036  |
| C <sub>10</sub> H <sub>20</sub> O <sub>2</sub> | n-Decanoic acid            | 334-48-5  | 172 | 42.24  | 0.030  |
| C <sub>11</sub> H <sub>22</sub> O <sub>2</sub> | n-Undecanoic acid          | 112-37-8  | 186 | 51.50  | 0.006  |
| C <sub>12</sub> H <sub>24</sub> O <sub>2</sub> | n-Dodecanoic acid          | 143-07-7  | 200 | 64.70  | 0.177  |
| C <sub>14</sub> H <sub>28</sub> O <sub>2</sub> | n-Tetradecanoic acid       | 544-63-8  | 228 | 122.43 | 0.143  |
| <b>Heterocyclic compounds</b>                  |                            |           |     |        |        |
| <i>Dioxanes</i>                                |                            |           |     |        |        |
| C <sub>4</sub> H <sub>8</sub> O <sub>2</sub>   | 1,4-Dioxane                | 123-91-1  | 88  | 13.33  | <0.001 |
| <i>Furans</i>                                  |                            |           |     |        |        |
| C <sub>5</sub> H <sub>6</sub> O                | 2-Methylfuran              | 534-22-5  | 82  | 10.16  | <0.001 |
| C <sub>6</sub> H <sub>8</sub> O                | 2-Ethylfuran               | 3208-16-0 | 96  | 13.98  | <0.001 |
| C <sub>6</sub> H <sub>6</sub> O                | 2-Vinylfuran               | 1487-18-9 | 94  | 14.68  | <0.001 |
| C <sub>8</sub> H <sub>12</sub> O               | 2-Butylfuran               | 4466-24-4 | 124 | 23.31  | <0.001 |
| C <sub>9</sub> H <sub>14</sub> O               | 2-Pentylfuran              | 3777-69-3 | 138 | 26.17  | 0.002  |
| <b>Nitrogenated compounds</b>                  |                            |           |     |        |        |
| N <sub>2</sub>                                 | Nitrogen                   | 7727-37-9 | 28  | 1.53   | 0.639  |
| H <sub>3</sub> N                               | Ammonia                    | 7664-41-7 | 17  | 2.51   | 0.131  |
| C <sub>2</sub> H <sub>3</sub> N                | Acetonitrile               | 75-05-8   | 41  | 6.52   | 0.009  |
| C <sub>3</sub> H <sub>5</sub> N                | Propargylamine             | 2450-71-7 | 55  | 9.04   | <0.001 |
| C <sub>4</sub> H <sub>5</sub> N                | Pyrrole                    | 109-97-7  | 67  | 14.21  | 0.007  |
| C <sub>2</sub> H <sub>5</sub> NO               | Acetamide                  | 60-35-5   | 59  | 14.81  | 0.007  |
| C <sub>5</sub> H <sub>5</sub> N                | Pyridine                   | 110-86-1  | 79  | 14.91  | 0.001  |
| C <sub>5</sub> H <sub>7</sub> N                | 3-Methyl-1H-pyrrole        | 616-43-3  | 81  | 14.78  | <0.001 |
| C <sub>3</sub> H <sub>5</sub> NO <sub>2</sub>  | 2-Oxo-propionamide         | x         | 87  | 16.79  | 0.005  |
| C <sub>6</sub> H <sub>9</sub> N                | 2,3-Dimethyl-1H-pyrrole    | 600-28-2  | 95  | 18.01  | <0.001 |
| C <sub>6</sub> H <sub>7</sub> N                | 2-Methylpyridine           | 109-06-8  | 93  | 18.34  | <0.001 |
| C <sub>6</sub> H <sub>7</sub> N                | 3-Methylpyridine           | 108-99-6  | 93  | 19.97  | <0.001 |
| C <sub>6</sub> H <sub>7</sub> N                | 4-Methylpyridine           | 108-89-4  | 93  | 20.07  | <0.001 |
| C <sub>3</sub> H <sub>4</sub> N <sub>2</sub>   | 1H-Pyrazole                | 288-13-1  | 68  | 22.24  | 0.009  |
| C <sub>5</sub> H <sub>11</sub> NO              | Pentanamide                | 626-97-1  | 101 | 25.62  | 0.005  |
| C <sub>4</sub> H <sub>7</sub> NO               | 2-Pyrrolidinone            | 616-45-5  | 85  | 25.70  | 0.014  |
| C <sub>6</sub> H <sub>8</sub> N <sub>2</sub> O | 2-Methoxy-6-methylpyrazine | 2882-21-5 | 124 | 27.07  | 0.005  |
| C <sub>4</sub> H <sub>5</sub> NO <sub>2</sub>  | Succinimide                | 123-56-8  | 99  | 28.03  | 0.009  |

|                                              |                    |           |     |       |        |
|----------------------------------------------|--------------------|-----------|-----|-------|--------|
| C <sub>11</sub> H <sub>23</sub> NO           | Undecanamide       | x         | 185 | 97.76 | 0.008  |
| <b>Sulfonated compounds</b>                  |                    |           |     |       |        |
| H <sub>2</sub> S                             | Hydrogen sulfide   | 7783-06-4 | 34  | 2.88  | 0.008  |
| COS                                          | Carbonyl sulfide   | 463-58-1  | 60  | 3.29  | 0.004  |
| O <sub>2</sub> S                             | Sulfur dioxide     | 7446-09-5 | 64  | 5.37  | 0.024  |
| CH <sub>4</sub> S                            | Methanethiol       | 74-93-1   | 48  | 5.37  | 0.007  |
| C <sub>2</sub> H <sub>6</sub> S              | Dimethyl sulfide   | 75-18-3   | 62  | 7.61  | 0.005  |
| CS <sub>2</sub>                              | Carbon disulfide   | 75-15-0   | 76  | 7.68  | 0.006  |
| C <sub>3</sub> H <sub>8</sub> S              | (Methylthio)ethane | 624-89-5  | 76  | 10.74 | <0.001 |
| C <sub>2</sub> H <sub>6</sub> S <sub>2</sub> | Dimethyl disulfide | 624-92-0  | 94  | 15.11 | 0.001  |
| <b>Inorganic compounds</b>                   |                    |           |     |       |        |
| <i>Oxides</i>                                |                    |           |     |       |        |
| CO <sub>2</sub>                              | Carbon dioxide     | 124-38-9  | 44  | 1.75  | 14.765 |
| H <sub>2</sub> O                             | Water              | 7732-18-5 | 18  | 3.04  | 81.082 |
| <i>Noble gases</i>                           |                    |           |     |       |        |
| Ar                                           | Argon              | 7440-37-1 | 40  | 1.50  | 0.003  |

Note: <sup>1</sup>CAS/(NIST) – unique numerical identifier of chemical compounds included in the register Chemical Abstracts Service (<https://www.cas.org>) or NIST number (a unique number given to each spectrum in the NIST archive); <sup>2</sup>MW – nominal mass; <sup>3</sup>RT – retention time; <sup>4</sup>A – normalized area (the area ratio of the individual gas mixture components to the sum of the areas of all the components in the chromatogram).
