# Supplementary material
Source: MDPI journal article supplement (https://www.mdpi.com/2075-163X/11/10/1090)
Supplement: s1 [file s1]

Table S14. Results of GC–MS analysis of volatiles extracted by mechanical shock crushing from quartz (Blagodatnoye deposit, Yenisei ridge).

| Formula                                    | Name                        | <sup>1</sup> CAS | <sup>2</sup> MW | Quartz 111-129.5     |                   |
|--------------------------------------------|-----------------------------|------------------|-----------------|----------------------|-------------------|
|                                            |                             |                  |                 | <sup>3</sup> RT, min | <sup>4</sup> A, % |
| Aliphatic hydrocarbons                     |                             |                  |                 |                      |                   |
| Paraffins                                  |                             |                  |                 |                      |                   |
| CH4                                        | Methane                     | 74-82-8          | 16              | 1.58                 | 1.151             |
| C2H6                                       | Ethane                      | 74-84-0          | 30              | 2.33                 | 0.058             |
| C5H12                                      | n-Pentane                   | 109-66-0         | 72              | 7.60                 | 0.068             |
| C6H14                                      | n-Hexane                    | 110-54-3         | 86              | 12.05                | 0.011             |
| C7H16                                      | n-Heptane                   | 142-82-5         | 100             | 16.19                | 0.020             |
| C8H18                                      | n-Octane                    | 111-65-9         | 114             | 20.33                | 0.037             |
| C9H20                                      | n-Nonane                    | 111-84-2         | 128             | 24.26                | 0.046             |
| C10H22                                     | n-Decane                    | 124-18-5         | 142             | 27.86                | 0.079             |
| C11H24                                     | n-Undecane                  | 1120-21-4        | 156             | 31.24                | 0.015             |
| C12H26                                     | n-Dodecane                  | 112-40-3         | 170             | 34.41                | 0.023             |
| C13H28                                     | n-Tridecane                 | 629-50-5         | 184             | 38.60                | 0.021             |
| C14H30                                     | n-Tetradecane               | 629-59-4         | 198             | 45.14                | 0.043             |
| C15H32                                     | n-Pentadecane               | 629-62-9         | 212             | 55.28                | 0.026             |
| C16H34                                     | n-Hexadecane                | 544-76-3         | 226             | 71.90                | 0.050             |
| Olefins                                    |                             |                  |                 |                      |                   |
| C2H4                                       | Ethylene                    | 74-85-1          | 28              | 2.05                 | 0.004             |
| C4H8                                       | 2-Methyl-1-propene          | 115-07-1         | 56              | 5.70                 | 0.008             |
| C4H8                                       | 2-Butene                    | 107-01-7         | 56              | 5.87                 | 0.009             |
| C5H8                                       | 1,3-Pentadiene              | 1574-41-0        | 68              | 8.46                 | 0.024             |
| C5H8                                       | (E)-1,3-Pentadiene          | 2004-70-8        | 68              | 8.65                 | 0.007             |
| C6H12                                      | 1-Hexene                    | 592-41-6         | 84              | 11.69                | 0.019             |
| C6H10                                      | (E)-2-Methyl-1,3-pentadiene | 926-54-5         | 82              | 12.74                | 0.007             |
| C7H14                                      | 1-Heptene                   | 592-76-7         | 98              | 15.78                | 0.010             |
| C8H16                                      | 1-Octene                    | 111-66-0         | 112             | 19.97                | 0.006             |
| C9H18                                      | 1-Nonene                    | 124-11-8         | 126             | 23.94                | 0.009             |
| C10H20                                     | 1-Decene                    | 872-05-9         | 140             | 27.61                | 0.014             |
| C11H22                                     | 1-Undecene                  | 821-95-4         | 154             | 30.99                | 0.012             |
| C12H24                                     | 1-Dodecene                  | 112-41-4         | 168             | 34.20                | 0.010             |
| C13H26                                     | 1-Tridecene                 | 2437-56-1        | 182             | 38.29                | 0.016             |
| C14H28                                     | 1-Tetradecene               | 1120-36-1        | 196             | 44.56                | 0.019             |
| C15H30                                     | 1-Pentadecene               | 13360-61-7       | 210             | 54.51                | 0.086             |
| C16H32                                     | 1-Hexadecene                | 629-73-2         | 224             | 70.54                | 0.028             |
| Cyclic hydrocarbons                        |                             |                  |                 |                      |                   |
| Cycloalkanes (naphthenes) and cycloalkenes |                             |                  |                 |                      |                   |
| C5H10                                      | Cyclopentane                | 287-92-3         | 70              | 8.25                 | 0.009             |
| Arenes                                     |                             |                  |                 |                      |                   |
| C6H6                                       | Benzene                     | 71-43-2          | 78              | 12.42                | 0.018             |
| C7H8                                       | Toluene                     | 108-88-3         | 92              | 16.92                | 0.013             |

|                                                |                                    |           |     |       |        |
|------------------------------------------------|------------------------------------|-----------|-----|-------|--------|
| C <sub>7</sub> H <sub>7</sub> F                | (Fluoromethyl)benzene              | 350-50-5  | 110 | 20.73 | <0.001 |
| C <sub>8</sub> H <sub>10</sub>                 | Ethylbenzene                       | 100-41-4  | 106 | 21.01 | 0.001  |
| C <sub>8</sub> H <sub>10</sub>                 | p-Xylene                           | 106-42-3  | 106 | 21.30 | 0.004  |
| C <sub>8</sub> H <sub>10</sub>                 | o-Xylene                           | 95-47-6   | 106 | 21.40 | 0.001  |
| C <sub>8</sub> H <sub>10</sub>                 | m-Xylene                           | 108-38-3  | 106 | 21.66 | 0.001  |
| C <sub>8</sub> H <sub>8</sub>                  | Styrene                            | 100-42-5  | 104 | 21.90 | 0.004  |
| C <sub>8</sub> H <sub>9</sub> F                | 3-Fluoro-o-xylene                  | 443-82-3  | 124 | 22.62 | 0.007  |
| C <sub>8</sub> H <sub>9</sub> F                | p-Fluoroethylbenzene               | 459-47-2  | 124 | 22.88 | 0.004  |
| C <sub>8</sub> H <sub>9</sub> F                | 5-Fluoro-m-xylene                  | 461-97-2  | 124 | 24.27 | 0.002  |
| C <sub>9</sub> H <sub>12</sub>                 | Propylbenzene                      | 103-65-1  | 120 | 24.87 | 0.008  |
| C <sub>10</sub> H <sub>14</sub>                | Butylbenzene                       | 104-51-8  | 134 | 28.73 | 0.012  |
| C <sub>11</sub> H <sub>16</sub>                | Pentylbenzene                      | 538-68-1  | 148 | 32.14 | 0.010  |
| C <sub>12</sub> H <sub>18</sub>                | Hexylbenzene                       | 1077-16-3 | 162 | 35.61 | 0.008  |
| <b>Oxygenated hydrocarbons</b>                 |                                    |           |     |       |        |
| <i>Alcohols</i>                                |                                    |           |     |       |        |
| CH <sub>4</sub> O                              | Methanol                           | 67-56-1   | 32  | 4.29  | 0.687  |
| C <sub>2</sub> H <sub>6</sub> O                | Ethanol                            | 64-17-5   | 46  | 6.12  | 0.017  |
| C <sub>3</sub> H <sub>8</sub> O                | 1-Propanol                         | 71-23-8   | 60  | 8.80  | 0.007  |
| C <sub>4</sub> H <sub>10</sub> O               | 1-Butanol                          | 71-36-3   | 74  | 12.55 | 0.011  |
| C <sub>6</sub> H <sub>6</sub> O                | Phenol                             | 108-95-2  | 94  | 24.44 | 0.028  |
| C <sub>7</sub> H <sub>8</sub> O                | 4-Methylphenol                     | 106-44-5  | 108 | 28.11 | 0.001  |
| C <sub>8</sub> H <sub>10</sub> O <sub>2</sub>  | 2-Phenoxyethanol                   | 122-99-6  | 138 | 32.80 | 0.007  |
| <i>Ethers and esters</i>                       |                                    |           |     |       |        |
| C <sub>5</sub> H <sub>8</sub> O <sub>2</sub>   | Methyl methacrylate                | 80-62-6   | 100 | 14.28 | 0.005  |
| C <sub>5</sub> H <sub>8</sub> O                | 3,4-Dihydro-2H-pyran               | 110-87-2  | 84  | 16.43 | 0.012  |
| C <sub>4</sub> H <sub>6</sub> O <sub>2</sub>   | Butyrolactone                      | 96-48-0   | 86  | 20.13 | 0.004  |
| C <sub>6</sub> H <sub>10</sub> O <sub>2</sub>  | γ-Hexalactone                      | 695-06-7  | 114 | 26.90 | 0.007  |
| C <sub>6</sub> H <sub>10</sub> O <sub>2</sub>  | Tetrahydro-6-methyl-2H-pyran-2-one | 823-22-3  | 114 | 29.59 | 0.040  |
| C <sub>7</sub> H <sub>12</sub> O <sub>2</sub>  | γ-Heptalactone                     | 105-21-5  | 128 | 30.61 | 0.004  |
| C <sub>8</sub> H <sub>14</sub> O <sub>2</sub>  | γ-Octalactone                      | 104-50-7  | 142 | 34.11 | 0.007  |
| C <sub>9</sub> H <sub>16</sub> O <sub>2</sub>  | γ-Nonalactone                      | 104-61-0  | 156 | 38.52 | 0.010  |
| C <sub>10</sub> H <sub>18</sub> O <sub>2</sub> | γ-Decalactone                      | 706-14-9  | 170 | 45.24 | 0.012  |
| C <sub>11</sub> H <sub>20</sub> O <sub>2</sub> | γ-Undecalatone                     | 104-67-6  | 184 | 59.30 | 0.171  |
| C <sub>12</sub> H <sub>22</sub> O <sub>2</sub> | γ-Dodecalatone                     | 2305-05-7 | 198 | 73.25 | 0.034  |
| <i>Aldehydes</i>                               |                                    |           |     |       |        |
| C <sub>2</sub> H <sub>4</sub> O                | Acetaldehyde                       | 75-07-0   | 44  | 5.14  | 0.019  |
| C <sub>3</sub> H <sub>4</sub> O                | 2-Propenal                         | 107-02-8  | 56  | 6.98  | 0.009  |
| C <sub>3</sub> H <sub>6</sub> O                | n-Propanal                         | 123-38-6  | 58  | 7.27  | 0.023  |
| C <sub>4</sub> H <sub>6</sub> O                | 2-Methyl-2-propenal                | 78-85-3   | 70  | 9.41  | 0.017  |
| C <sub>4</sub> H <sub>8</sub> O                | 2-Methylpropanal                   | 78-84-2   | 72  | 9.48  | 0.004  |
| C <sub>4</sub> H <sub>8</sub> O                | n-Butanal                          | 123-72-8  | 72  | 10.24 | 0.005  |
| C <sub>5</sub> H <sub>10</sub> O               | 3-Methylbutanal                    | 590-86-3  | 86  | 13.40 | 0.018  |
| C <sub>5</sub> H <sub>10</sub> O               | n-Pentanal                         | 110-62-3  | 86  | 14.40 | 0.012  |
| C <sub>5</sub> H <sub>4</sub> O <sub>2</sub>   | Furfural                           | 98-01-1   | 96  | 16.96 | 0.001  |

|                                                |                                 |            |     |       |       |
|------------------------------------------------|---------------------------------|------------|-----|-------|-------|
| C <sub>5</sub> H <sub>4</sub> O <sub>2</sub>   | 3-Furaldehyde                   | 498-60-2   | 96  | 17.79 | 0.028 |
| C <sub>6</sub> H <sub>12</sub> O               | n-Hexanal                       | 66-25-1    | 100 | 18.79 | 0.029 |
| C <sub>7</sub> H <sub>14</sub> O               | n-Heptanal                      | 111-71-7   | 114 | 22.99 | 0.023 |
| C <sub>7</sub> H <sub>6</sub> O                | Benzaldehyde                    | 100-52-7   | 106 | 23.69 | 0.050 |
| C <sub>8</sub> H <sub>16</sub> O               | 2-Ethylhexanal                  | 123-05-7   | 128 | 25.52 | 0.009 |
| C <sub>8</sub> H <sub>16</sub> O               | n-Octanal                       | 124-13-0   | 128 | 26.88 | 0.050 |
| C <sub>9</sub> H <sub>18</sub> O               | n-Nonanal                       | 124-19-6   | 142 | 30.42 | 0.086 |
| C <sub>10</sub> H <sub>20</sub> O              | n-Decanal                       | 112-31-2   | 156 | 33.72 | 0.117 |
| C <sub>11</sub> H <sub>22</sub> O              | n-Undecanal                     | 112-44-7   | 170 | 37.71 | 0.020 |
| C <sub>8</sub> H <sub>6</sub> O <sub>3</sub>   | Piperonal                       | 120-57-0   | 150 | 41.03 | 0.066 |
| C <sub>12</sub> H <sub>24</sub> O              | n-Dodecanal                     | 112-54-9   | 184 | 43.77 | 0.031 |
| C <sub>13</sub> H <sub>26</sub> O              | n-Tridecanal                    | 10486-19-8 | 198 | 53.40 | 0.067 |
| C <sub>14</sub> H <sub>28</sub> O              | Tertadecanal                    | 124-25-4   | 212 | 68.81 | 0.052 |
| C <sub>15</sub> H <sub>30</sub> O              | n-Pentadecanal                  | 2765-11-9  | 226 | 93.83 | 0.052 |
| <i>Ketones</i>                                 |                                 |            |     |       |       |
| C <sub>3</sub> H <sub>6</sub> O                | 2-Propanone                     | 67-64-1    | 58  | 7.33  | 0.029 |
| C <sub>4</sub> H <sub>6</sub> O                | 2-Butenone                      | 78-94-4    | 70  | 9.96  | 0.002 |
| C <sub>4</sub> H <sub>6</sub> O <sub>2</sub>   | 2,3-Butanedione                 | 431-03-8   | 86  | 10.32 | 0.003 |
| C <sub>4</sub> H <sub>8</sub> O                | 2-Butanone                      | 78-93-3    | 72  | 10.37 | 0.005 |
| C <sub>5</sub> H <sub>10</sub> O               | 2-Pentanone                     | 107-87-9   | 86  | 14.15 | 0.010 |
| C <sub>5</sub> H <sub>8</sub> O                | Cyclopentanone                  | 120-92-3   | 84  | 16.69 | 0.004 |
| C <sub>6</sub> H <sub>12</sub> O               | 2-Hexanone                      | 591-78-6   | 100 | 18.52 | 0.007 |
| C <sub>7</sub> H <sub>14</sub> O               | 2-Heptanone                     | 110-43-0   | 114 | 22.69 | 0.014 |
| C <sub>5</sub> H <sub>6</sub> O <sub>3</sub>   | Dihydro-3-methyl-2,5-furandione | 4100-80-5  | 114 | 25.89 | 0.033 |
| C <sub>8</sub> H <sub>16</sub> O               | 2-Octanone                      | 111-13-7   | 128 | 26.53 | 0.020 |
| C <sub>9</sub> H <sub>18</sub> O               | 2-Nonanone                      | 821-55-6   | 142 | 30.11 | 0.024 |
| C <sub>10</sub> H <sub>20</sub> O              | 2-Decanone                      | 693-54-9   | 156 | 33.37 | 0.015 |
| C <sub>8</sub> H <sub>4</sub> O <sub>3</sub>   | 1,3-Isobenzofurandione          | 85-44-9    | 148 | 35.15 | 0.032 |
| C <sub>11</sub> H <sub>22</sub> O              | 2-Undecanone                    | 53452-70-3 | 170 | 37.21 | 0.016 |
| C <sub>12</sub> H <sub>24</sub> O              | 2-Dodecanone                    | 6175-49-1  | 184 | 42.96 | 0.010 |
| C <sub>13</sub> H <sub>26</sub> O              | 2-Tridecanone                   | 593-08-8   | 198 | 52.00 | 0.033 |
| C <sub>14</sub> H <sub>28</sub> O              | 2-Tetradecanone                 | 2345-27-9  | 212 | 66.38 | 0.043 |
| C <sub>15</sub> H <sub>30</sub> O              | 2-Pentadecanone                 | 2345-28-0  | 226 | 90.21 | 0.096 |
| <i>Carboxylic acids</i>                        |                                 |            |     |       |       |
| C <sub>2</sub> H <sub>4</sub> O <sub>2</sub>   | Acetic acid                     | 64-19-7    | 60  | 11.17 | 1.899 |
| C <sub>4</sub> H <sub>8</sub> O <sub>2</sub>   | n-Butanoic acid                 | 107-92-6   | 88  | 19.10 | 0.137 |
| C <sub>5</sub> H <sub>10</sub> O <sub>2</sub>  | 3-Methylbutanoic acid           | 503-74-2   | 102 | 22.19 | 0.013 |
| C <sub>5</sub> H <sub>10</sub> O <sub>2</sub>  | n-Pentanoic acid                | 109-52-4   | 102 | 23.14 | 0.037 |
| C <sub>6</sub> H <sub>12</sub> O <sub>2</sub>  | n-Hexanoic acid                 | 142-62-1   | 116 | 26.62 | 0.158 |
| C <sub>7</sub> H <sub>14</sub> O <sub>2</sub>  | n-Heptanoic acid                | 111-14-8   | 130 | 30.13 | 0.043 |
| C <sub>8</sub> H <sub>16</sub> O <sub>2</sub>  | n-Octanoic acid                 | 124-07-2   | 144 | 33.25 | 0.089 |
| C <sub>9</sub> H <sub>18</sub> O <sub>2</sub>  | n-Nonanoic acid                 | 112-05-0   | 158 | 36.92 | 0.085 |
| C <sub>10</sub> H <sub>20</sub> O <sub>2</sub> | n-Decanoic acid                 | 334-48-5   | 172 | 42.36 | 0.128 |
| C <sub>11</sub> H <sub>22</sub> O <sub>2</sub> | n-Undecanoic acid               | 112-37-8   | 186 | 51.49 | 0.011 |

|                                                 |                                    |            |     |        |        |
|-------------------------------------------------|------------------------------------|------------|-----|--------|--------|
| C <sub>12</sub> H <sub>24</sub> O <sub>2</sub>  | n-Dodecanoic acid                  | 143-07-7   | 200 | 64.85  | 0.143  |
| C <sub>14</sub> H <sub>28</sub> O <sub>2</sub>  | 3-Methyltridecanoic acid           | x          | 228 | 110.42 | 0.412  |
| C <sub>14</sub> H <sub>28</sub> O <sub>2</sub>  | n-Tetradecanoic acid               | 544-63-8   | 228 | 123.74 | 0.128  |
| <b>Heterocyclic compounds</b>                   |                                    |            |     |        |        |
| <i>Dioxanes</i>                                 |                                    |            |     |        |        |
| C <sub>4</sub> H <sub>8</sub> O <sub>2</sub>    | 1,4-Dioxane                        | 123-91-1   | 88  | 13.32  | 0.001  |
| C <sub>10</sub> H <sub>16</sub>                 | dl-Limonene                        | 138-86-3   | 136 | 27.96  | 0.009  |
| <i>Furans</i>                                   |                                    |            |     |        |        |
| C <sub>5</sub> H <sub>6</sub> O                 | 2-Methylfuran                      | 534-22-5   | 82  | 10.14  | 0.001  |
| C <sub>6</sub> H <sub>8</sub> O                 | 2-Ethylfuran                       | 3208-16-0  | 96  | 13.95  | <0.001 |
| C <sub>6</sub> H <sub>6</sub> O                 | 2-Vinylfuran                       | 1487-18-9  | 94  | 14.70  | <0.001 |
| C <sub>7</sub> H <sub>10</sub> O                | 2-Propylfuran                      | 4229-91-8  | 110 | 17.61  | 0.028  |
| C <sub>8</sub> H <sub>12</sub> O                | 2-Butylfuran                       | 4466-24-4  | 124 | 23.26  | 0.001  |
| C <sub>9</sub> H <sub>14</sub> O                | 2-Pentylfuran                      | 3777-69-3  | 138 | 26.15  | 0.004  |
| <i>Pyrans</i>                                   |                                    |            |     |        |        |
| C <sub>6</sub> H <sub>11</sub> BrO              | 2-(Bromomethyl)tetrahydro-2H-pyran | 34723-82-5 | 178 | 29.49  | 0.004  |
| <b>Nitrogenated compounds</b>                   |                                    |            |     |        |        |
| N <sub>2</sub>                                  | Nitrogen                           | 7727-37-9  | 28  | 1.51   | 0.512  |
| C <sub>2</sub> H <sub>3</sub> N                 | Acetonitrile                       | 75-05-8    | 41  | 6.53   | 0.031  |
| C <sub>3</sub> H <sub>5</sub> N                 | Propargylamine                     | 2450-71-7  | 55  | 9.03   | 0.001  |
| C <sub>4</sub> H <sub>5</sub> N                 | Pyrrole                            | 109-97-7   | 67  | 14.20  | 0.011  |
| C <sub>2</sub> H <sub>5</sub> NO                | Acetamide                          | 60-35-5    | 59  | 14.78  | 0.259  |
| C <sub>5</sub> H <sub>5</sub> N                 | Pyridine                           | 110-86-1   | 79  | 14.91  | 0.003  |
| C <sub>3</sub> H <sub>5</sub> NO <sub>2</sub>   | 2-Oxo-propionamide                 | x          | 87  | 17.72  | 0.022  |
| C <sub>6</sub> H <sub>9</sub> N                 | 2,3-Dimethyl-1H-pyrrole            | 600-28-2   | 95  | 18.82  | 0.002  |
| C <sub>6</sub> H <sub>7</sub> N                 | 2-Methylpyridine                   | 109-06-8   | 93  | 18.32  | 0.001  |
| C <sub>6</sub> H <sub>13</sub> N                | 1-Methylpiperidine                 | 626-67-5   | 99  | 19.00  | 0.004  |
| C <sub>3</sub> H <sub>4</sub> N <sub>2</sub>    | 1H-Pyrazole                        | 288-13-1   | 68  | 22.23  | 0.013  |
| C <sub>4</sub> H <sub>7</sub> NO                | 2-Pyrrolidinone                    | 616-45-5   | 85  | 25.70  | 0.017  |
| C <sub>4</sub> H <sub>7</sub> NO <sub>2</sub>   | N-Acetyl-acetamide                 | x          | 101 | 25.74  | 0.006  |
| C <sub>10</sub> H <sub>11</sub> NO <sub>4</sub> | 3-Nitrobenzeneethanol acetate      | 68527-46-8 | 209 | 102.71 | 0.704  |
| <b>Sulfonated compounds</b>                     |                                    |            |     |        |        |
| H <sub>2</sub> S                                | Hydrogen sulfide                   | 7783-06-4  | 34  | 2.93   | 0.008  |
| COS                                             | Carbonyl sulfide                   | 463-58-1   | 60  | 3.43   | 0.001  |
| O <sub>2</sub> S                                | Sulfur dioxide                     | 7446-09-5  | 64  | 5.14   | 0.128  |
| CH <sub>4</sub> S                               | Methanethiol                       | 74-93-1    | 48  | 5.37   | 0.009  |
| CS <sub>2</sub>                                 | Carbon disulfide                   | 75-15-0    | 76  | 7.70   | 0.005  |
| C <sub>2</sub> H <sub>6</sub> S <sub>2</sub>    | Dimethyl disulfide                 | 624-92-0   | 94  | 15.11  | 0.004  |
| C <sub>5</sub> H <sub>4</sub> OS                | 3-Thiophenecarboxaldehyde          | 498-62-4   | 112 | 25.95  | 0.001  |
| <b>Inorganic compounds</b>                      |                                    |            |     |        |        |
| <i>Oxides</i>                                   |                                    |            |     |        |        |

|                    |                |           |    |      |        |
|--------------------|----------------|-----------|----|------|--------|
| CO <sub>2</sub>    | Carbon dioxide | 124-38-9  | 44 | 1.75 | 3.598  |
| H <sub>2</sub> O   | Water          | 7732-18-5 | 18 | 2.93 | 87.032 |
| <i>Noble gases</i> |                |           |    |      |        |
| Ar                 | Argon          | 7440-37-1 | 40 | 1.50 | 0.018  |

Note: <sup>1</sup>CAS – unique numerical identifier of chemical compounds included in the register Chemical Abstracts Service (<https://www.cas.org>); <sup>2</sup>MW – nominal mass; <sup>3</sup>RT – retention time; <sup>4</sup>A – normalized area (the area ratio of the individual gas mixture components to the sum of the areas of all the components in the chromatogram).
