# Supplementary material
Source: MDPI journal article supplement (https://www.mdpi.com/2075-163X/11/10/1090)
Supplement: s1 [file s1]

Table S13. Results of GC–MS analysis of volatiles extracted by mechanical shock crushing from quartz (Blagodatnoye deposit, Yenisei ridge).

| Formula                                    | Name                        | <sup>1</sup> CAS/(NIST) | <sup>2</sup> MW | Quartz 111/120.6        |                   |
|--------------------------------------------|-----------------------------|-------------------------|-----------------|-------------------------|-------------------|
|                                            |                             |                         |                 | <sup>3</sup> RT,<br>min | <sup>4</sup> A, % |
| Aliphatic hydrocarbons                     |                             |                         |                 |                         |                   |
| Paraffins                                  |                             |                         |                 |                         |                   |
| CH4                                        | Methane                     | 74-82-8                 | 16              | 1.60                    | 0.746             |
| C2H6                                       | Ethane                      | 74-84-0                 | 30              | 2.34                    | 0.015             |
| C3H8                                       | n-Propane                   | 74-98-6                 | 44              | 3.99                    | 0.004             |
| C5H12                                      | n-Pentane                   | 109-66-0                | 72              | 7.60                    | 0.038             |
| C6H14                                      | n-Hexane                    | 110-54-3                | 86              | 12.05                   | 0.001             |
| C7H16                                      | n-Heptane                   | 142-82-5                | 100             | 16.19                   | 0.011             |
| C8H18                                      | n-Octane                    | 111-65-9                | 114             | 20.33                   | 0.021             |
| C9H20                                      | n-Nonane                    | 111-84-2                | 128             | 24.26                   | 0.022             |
| C10H22                                     | n-Decane                    | 124-18-5                | 142             | 27.81                   | 0.124             |
| C11H24                                     | n-Undecane                  | 1120-21-4               | 156             | 31.24                   | 0.012             |
| C12H26                                     | n-Dodecane                  | 112-40-3                | 170             | 34.95                   | 0.080             |
| C13H28                                     | n-Tridecane                 | 629-50-5                | 184             | 38.64                   | 0.026             |
| C14H30                                     | n-Tetradecane               | 629-59-4                | 198             | 45.14                   | 0.044             |
| C15H32                                     | n-Pentadecane               | 629-62-9                | 212             | 55.40                   | 0.032             |
| C16H34                                     | n-Hexadecane                | 544-76-3                | 226             | 71.94                   | 0.073             |
| C17H36                                     | 7-Methylhexadecane          | 26730-20-1              | 240             | 78.85                   | 0.103             |
| C17H36                                     | n-Heptadecane               | 629-78-7                | 240             | 98.72                   | 0.004             |
| Olefins                                    |                             |                         |                 |                         |                   |
| C2H4                                       | Ethylene                    | 74-85-1                 | 28              | 2.03                    | 0.004             |
| C4H8                                       | 2-Methyl-1-propene          | 115-11-7                | 56              | 5.74                    | 0.003             |
| C4H8                                       | 2-Butene                    | 107-01-7                | 56              | 5.87                    | 0.010             |
| C5H8                                       | 1,3-Pentadiene              | 1574-41-0               | 68              | 8.45                    | 0.020             |
| C6H12                                      | 1-Hexene                    | 592-41-6                | 84              | 11.69                   | 0.001             |
| C6H10                                      | (E)-2-Methyl-1,3-pentadiene | 926-54-5                | 82              | 12.77                   | 0.004             |
| C7H14                                      | 1-Heptene                   | 592-76-7                | 98              | 15.79                   | 0.014             |
| C8H16                                      | 1-Octene                    | 111-66-0                | 112             | 19.60                   | 0.013             |
| C9H18                                      | 1-Nonene                    | 124-11-8                | 126             | 23.94                   | 0.009             |
| C10H20                                     | 1-Decene                    | 872-05-9                | 140             | 27.61                   | 0.010             |
| C11H22                                     | 1-Undecene                  | 821-95-4                | 154             | 31.01                   | 0.010             |
| C12H24                                     | 1-Dodecene                  | 112-41-4                | 168             | 34.20                   | 0.021             |
| C13H26                                     | 1-Tridecene                 | 2437-56-1               | 182             | 38.32                   | 0.009             |
| C14H28                                     | 1-Tetradecene               | 1120-36-1               | 196             | 44.67                   | 0.029             |
| C15H30                                     | 1-Pentadecene               | 13360-61-7              | 210             | 54.60                   | 0.068             |
| Cyclic hydrocarbons                        |                             |                         |                 |                         |                   |
| Cycloalkanes (naphthenes) and cycloalkenes |                             |                         |                 |                         |                   |
| C5H10                                      | Cyclopentane                | 287-92-3                | 70              | 8.23                    | 0.002             |
| C10H16                                     | dl-Limonene                 | 138-86-3                | 136             | 28.00                   | 0.004             |
| Arenes                                     |                             |                         |                 |                         |                   |

|                                                |                                             |            |     |        |        |
|------------------------------------------------|---------------------------------------------|------------|-----|--------|--------|
| C <sub>6</sub> H <sub>6</sub>                  | Benzene                                     | 71-43-2    | 78  | 12.40  | 0.014  |
| C <sub>7</sub> H <sub>8</sub>                  | Toluene                                     | 108-88-3   | 92  | 16.91  | 0.007  |
| C <sub>7</sub> H <sub>7</sub> F                | (Fluoromethyl)benzene                       | 350-50-5   | 110 | 20.72  | 0.001  |
| C <sub>8</sub> H <sub>10</sub>                 | Ethylbenzene                                | 100-41-4   | 106 | 21.01  | 0.003  |
| C <sub>8</sub> H <sub>10</sub>                 | p-Xylene                                    | 106-42-3   | 106 | 21.30  | 0.008  |
| C <sub>8</sub> H <sub>10</sub>                 | o-Xylene                                    | 95-47-6    | 106 | 21.48  | 0.002  |
| C <sub>8</sub> H <sub>8</sub>                  | Styrene                                     | 100-42-5   | 104 | 21.86  | 0.005  |
| C <sub>8</sub> H <sub>10</sub>                 | m-Xylene                                    | 108-38-3   | 106 | 21.90  | 0.003  |
| C <sub>8</sub> H <sub>9</sub> F                | 3-Fluoro-o-xylene                           | 443-82-3   | 124 | 22.23  | <0.001 |
| C <sub>8</sub> H <sub>9</sub> F                | 5-Fluoro-m-xylene                           | 461-97-2   | 124 | 23.71  | <0.001 |
| C <sub>8</sub> H <sub>9</sub> F                | p-Fluoroethylbenzene                        | 459-47-2   | 124 | 22.89  | 0.002  |
| C <sub>9</sub> H <sub>12</sub>                 | Propylbenzene                               | 103-65-1   | 120 | 24.89  | 0.002  |
| C <sub>10</sub> H <sub>12</sub>                | (2-Methyl-2-propenyl)-benzene               | 3290-53-7  | 132 | 27.15  | 0.005  |
| C <sub>10</sub> H <sub>14</sub>                | Butylbenzene                                | 104-51-8   | 134 | 28.71  | 0.004  |
| C <sub>11</sub> H <sub>16</sub>                | Pentylbenzene                               | 538-68-1   | 148 | 32.14  | <0.001 |
| C <sub>11</sub> H <sub>14</sub>                | (1-Ethyl-2-propenyl)-benzene                | 19947-22-9 | 146 | 34.41  | 0.012  |
| C <sub>12</sub> H <sub>18</sub>                | Hexylbenzene                                | 1077-16-3  | 162 | 36.41  | 0.004  |
| C <sub>13</sub> H <sub>20</sub>                | Heptylbenzene                               | 1078-71-3  | 176 | 41.68  | 0.004  |
| <b>Oxygenated hydrocarbons</b>                 |                                             |            |     |        |        |
| <i>Alcohols</i>                                |                                             |            |     |        |        |
| CH <sub>4</sub> O                              | Methanol                                    | 67-56-1    | 32  | 4.24   | 0.128  |
| C <sub>2</sub> H <sub>6</sub> O                | Ethanol                                     | 64-17-5    | 46  | 6.10   | 0.036  |
| C <sub>3</sub> H <sub>8</sub> O                | Isopropyl Alcohol                           | 67-63-0    | 60  | 7.73   | 0.015  |
| C <sub>3</sub> H <sub>8</sub> O                | 1-Propanol                                  | 71-23-8    | 60  | 8.80   | 0.005  |
| C <sub>4</sub> H <sub>10</sub> O               | 1-Butanol                                   | 71-36-3    | 74  | 12.55  | 0.026  |
| C <sub>5</sub> H <sub>6</sub> O <sub>2</sub>   | 2-Furanmethanol                             | 98-00-0    | 98  | 18.97  | 0.005  |
| C <sub>6</sub> H <sub>6</sub> O                | Phenol                                      | 108-95-2   | 94  | 24.42  | 0.018  |
| C <sub>7</sub> H <sub>8</sub> O                | 4-Methylphenol                              | 106-44-5   | 108 | 28.03  | 0.007  |
| <i>Ethers and esters</i>                       |                                             |            |     |        |        |
| C <sub>5</sub> H <sub>8</sub> O <sub>2</sub>   | Methyl methacrylate                         | 80-62-6    | 100 | 14.26  | 0.007  |
| C <sub>5</sub> H <sub>8</sub> O                | 3,4-Dihydro-2H-pyran                        | 110-87-2   | 84  | 16.41  | 0.008  |
| C <sub>4</sub> H <sub>6</sub> O <sub>2</sub>   | Butyrolactone                               | 96-48-0    | 86  | 20.10  | 0.003  |
| C <sub>4</sub> H <sub>4</sub> O <sub>2</sub>   | α-Crotonolactone                            | 20825-71-2 | 84  | 20.35  | 0.004  |
| C <sub>6</sub> H <sub>10</sub> O <sub>2</sub>  | γ-Hexalactone                               | 695-06-7   | 114 | 26.90  | 0.005  |
| C <sub>6</sub> H <sub>10</sub> O <sub>2</sub>  | δ-Hexalactone                               | 823-22-3   | 114 | 29.58  | 0.035  |
| C <sub>7</sub> H <sub>12</sub> O <sub>2</sub>  | γ-Heptalactone                              | 105-21-5   | 128 | 30.62  | 0.003  |
| C <sub>10</sub> H <sub>18</sub> O <sub>3</sub> | Ethyl ester 2-acetyl-4-methylpentanoic acid | 1522-34-5  | 186 | 32.65  | 0.054  |
| C <sub>8</sub> H <sub>14</sub> O <sub>2</sub>  | γ-Octalactone                               | 104-50-7   | 142 | 34.10  | 0.006  |
| C <sub>9</sub> H <sub>16</sub> O <sub>2</sub>  | γ-Nonalactone                               | 104-61-0   | 156 | 38.52  | 0.011  |
| C <sub>10</sub> H <sub>18</sub> O <sub>2</sub> | γ-Decalactone                               | 706-14-9   | 170 | 45.25  | 0.013  |
| C <sub>11</sub> H <sub>20</sub> O <sub>2</sub> | γ-Undecalatone                              | 104-67-6   | 184 | 55.89  | 0.002  |
| C <sub>12</sub> H <sub>22</sub> O <sub>2</sub> | γ-Dodecalactone                             | 2305-05-7  | 198 | 73.08  | 0.016  |
| C <sub>15</sub> H <sub>28</sub> O <sub>4</sub> | 3-Methylbut-2-yl 3-                         | (390641)   | 272 | 101.05 | 0.009  |

|                                              |                                     |            |     |       |       |
|----------------------------------------------|-------------------------------------|------------|-----|-------|-------|
|                                              | methylpentyl ester<br>succinic acid |            |     |       |       |
| <i>Aldehydes</i>                             |                                     |            |     |       |       |
| C <sub>2</sub> H <sub>4</sub> O              | Acetaldehyde                        | 75-07-0    | 44  | 5.04  | 0.252 |
| C <sub>3</sub> H <sub>4</sub> O              | 2-Propenal                          | 107-02-8   | 56  | 6.98  | 0.006 |
| C <sub>3</sub> H <sub>6</sub> O              | n-Propanal                          | 123-38-6   | 58  | 7.25  | 0.072 |
| C <sub>4</sub> H <sub>6</sub> O              | 2-Methyl-2-propenal                 | 78-85-3    | 70  | 9.39  | 0.004 |
| C <sub>4</sub> H <sub>8</sub> O              | 2-Methylpropanal                    | 78-84-2    | 72  | 9.48  | 0.005 |
| C <sub>4</sub> H <sub>8</sub> O              | n-Butanal                           | 123-72-8   | 72  | 10.34 | 0.053 |
| C <sub>5</sub> H <sub>10</sub> O             | 3-Methylbutanal                     | 590-86-3   | 86  | 13.38 | 0.001 |
| C <sub>5</sub> H <sub>10</sub> O             | n-Pentanal                          | 110-62-3   | 86  | 14.40 | 0.010 |
| C <sub>5</sub> H <sub>4</sub> O <sub>2</sub> | 2-Furaldehyde                       | 98-01-1    | 96  | 16.96 | 0.002 |
| C <sub>5</sub> H <sub>4</sub> O <sub>2</sub> | 3-Furaldehyde                       | 498-60-2   | 96  | 17.77 | 0.012 |
| C <sub>6</sub> H <sub>12</sub> O             | n-Hexanal                           | 66-25-1    | 100 | 18.79 | 0.016 |
| C <sub>7</sub> H <sub>14</sub> O             | n-Heptanal                          | 111-71-7   | 114 | 22.99 | 0.018 |
| C <sub>7</sub> H <sub>6</sub> O              | Benzaldehyde                        | 100-52-7   | 106 | 23.69 | 0.034 |
| C <sub>8</sub> H <sub>16</sub> O             | 2-Ethylhexanal                      | 123-05-7   | 128 | 25.52 | 0.024 |
| C <sub>8</sub> H <sub>16</sub> O             | n-Octanal                           | 124-13-0   | 128 | 26.88 | 0.034 |
| C <sub>9</sub> H <sub>18</sub> O             | n-Nonanal                           | 124-19-6   | 142 | 30.42 | 0.043 |
| C <sub>10</sub> H <sub>20</sub> O            | n-Decanal                           | 112-31-2   | 156 | 33.72 | 0.075 |
| C <sub>11</sub> H <sub>22</sub> O            | n-Undecanal                         | 112-44-7   | 170 | 37.72 | 0.025 |
| C <sub>12</sub> H <sub>24</sub> O            | n-Dodecanal                         | 112-54-9   | 184 | 43.79 | 0.022 |
| C <sub>13</sub> H <sub>26</sub> O            | n-Tridecanal                        | 10486-19-8 | 198 | 53.42 | 0.033 |
| C <sub>14</sub> H <sub>28</sub> O            | n-Tetradecanal                      | 124-25-4   | 212 | 68.84 | 0.049 |
| C <sub>15</sub> H <sub>30</sub> O            | n-Pentadecanal                      | 2765-11-9  | 226 | 94.01 | 0.060 |
| <i>Ketones</i>                               |                                     |            |     |       |       |
| C <sub>3</sub> H <sub>6</sub> O              | 2-Propanone                         | 67-64-1    | 58  | 7.32  | 0.118 |
| C <sub>4</sub> H <sub>6</sub> O              | 2-Butenone                          | 78-94-4    | 70  | 9.94  | 0.002 |
| C <sub>4</sub> H <sub>6</sub> O <sub>2</sub> | 2,3-Butanedione                     | 431-03-8   | 86  | 10.32 | 0.002 |
| C <sub>4</sub> H <sub>8</sub> O              | 2-Butanone                          | 78-93-3    | 72  | 10.36 | 0.005 |
| C <sub>5</sub> H <sub>10</sub> O             | 2-Pentanone                         | 107-87-9   | 86  | 14.15 | 0.001 |
| C <sub>5</sub> H <sub>8</sub> O              | Cyclopentanone                      | 120-92-3   | 84  | 16.68 | 0.004 |
| C <sub>6</sub> H <sub>12</sub> O             | 2-Hexanone                          | 591-78-6   | 100 | 18.52 | 0.008 |
| C <sub>7</sub> H <sub>14</sub> O             | 2-Heptanone                         | 110-43-0   | 114 | 22.69 | 0.014 |
| C <sub>5</sub> H <sub>6</sub> O <sub>3</sub> | Dihydro-3-methyl-2,5-furandione     | 4100-80-5  | 114 | 25.87 | 0.021 |
| C <sub>8</sub> H <sub>16</sub> O             | 2-Octanone                          | 111-13-7   | 128 | 26.55 | 0.024 |
| C <sub>9</sub> H <sub>18</sub> O             | 2-Nonanone                          | 821-55-6   | 142 | 30.09 | 0.018 |
| C <sub>10</sub> H <sub>20</sub> O            | 2-Decanone                          | 693-54-9   | 156 | 33.38 | 0.018 |
| C <sub>8</sub> H <sub>4</sub> O <sub>3</sub> | 1,3-Isobenzofurandione              | 85-44-9    | 148 | 35.13 | 0.083 |
| C <sub>11</sub> H <sub>22</sub> O            | 2-Undecanone                        | 53452-70-3 | 170 | 37.19 | 0.019 |
| C <sub>12</sub> H <sub>24</sub> O            | 2-Dodecanone                        | 6175-49-1  | 184 | 42.96 | 0.007 |
| C <sub>13</sub> H <sub>26</sub> O            | 3-Tridecanone                       | 1534-26-5  | 198 | 46.40 | 0.038 |
| C <sub>13</sub> H <sub>26</sub> O            | 2-Tridecanone                       | 593-08-8   | 198 | 51.89 | 0.087 |
| C <sub>14</sub> H <sub>28</sub> O            | 2-Tetradecanone                     | 2345-27-9  | 212 | 66.60 | 0.038 |

|                                                |                            |           |     |        |        |
|------------------------------------------------|----------------------------|-----------|-----|--------|--------|
| C <sub>15</sub> H <sub>30</sub> O              | 2-Pentadecanone            | 2345-28-0 | 226 | 90.09  | 0.110  |
| <i>Carboxylic acids</i>                        |                            |           |     |        |        |
| C <sub>2</sub> H <sub>4</sub> O <sub>2</sub>   | Acetic acid                | 64-19-7   | 60  | 11.14  | 1.755  |
| C <sub>3</sub> H <sub>6</sub> O <sub>2</sub>   | n-Propanoic acid           | 79-09-4   | 74  | 15.38  | 0.003  |
| C <sub>4</sub> H <sub>8</sub> O <sub>2</sub>   | n-Butanoic acid            | 107-92-6  | 88  | 19.07  | 0.051  |
| C <sub>5</sub> H <sub>10</sub> O <sub>2</sub>  | 3-Methylbutanoic acid      | 503-74-2  | 102 | 22.10  | 0.020  |
| C <sub>5</sub> H <sub>10</sub> O <sub>2</sub>  | n-Pentanoic acid           | 109-52-4  | 102 | 23.09  | 0.343  |
| C <sub>6</sub> H <sub>12</sub> O <sub>2</sub>  | n-Hexanoic acid            | 142-62-1  | 116 | 26.60  | 0.103  |
| C <sub>7</sub> H <sub>14</sub> O <sub>2</sub>  | n-Heptanoic acid           | 111-14-8  | 130 | 30.09  | 0.068  |
| C <sub>8</sub> H <sub>16</sub> O <sub>2</sub>  | n-Octanoic acid            | 124-07-2  | 144 | 33.17  | 0.125  |
| C <sub>9</sub> H <sub>18</sub> O <sub>2</sub>  | n-Nonanoic acid            | 112-05-0  | 158 | 36.74  | 0.125  |
| C <sub>10</sub> H <sub>20</sub> O <sub>2</sub> | n-Decanoic acid            | 334-48-5  | 172 | 42.13  | 0.097  |
| C <sub>11</sub> H <sub>22</sub> O <sub>2</sub> | n-Undecanoic acid          | 112-37-8  | 186 | 51.31  | 0.032  |
| C <sub>12</sub> H <sub>24</sub> O <sub>2</sub> | n-Dodecanoic acid          | 143-07-7  | 200 | 64.17  | 0.208  |
| C <sub>13</sub> H <sub>26</sub> O <sub>2</sub> | n-Tridecanoic acid         | 638-53-9  | 214 | 88.78  | 0.024  |
| C <sub>14</sub> H <sub>28</sub> O <sub>2</sub> | n-Tetradecanoic acid       | 544-63-8  | 228 | 120.15 | 0.614  |
| <b>Heterocyclic compounds</b>                  |                            |           |     |        |        |
| <i>Dioxanes</i>                                |                            |           |     |        |        |
| C <sub>4</sub> H <sub>8</sub> O <sub>2</sub>   | 1,4-Dioxane                | 123-91-1  | 88  | 13.33  | 0.001  |
| <i>Furans</i>                                  |                            |           |     |        |        |
| C <sub>5</sub> H <sub>6</sub> O                | 2-Methylfuran              | 534-22-5  | 82  | 10.14  | 0.001  |
| C <sub>5</sub> H <sub>6</sub> O                | 3-Methylfuran              | 930-27-8  | 82  | 10.42  | <0.001 |
| C <sub>6</sub> H <sub>8</sub> O                | 2-Ethylfuran               | 3208-16-0 | 96  | 13.95  | <0.001 |
| C <sub>6</sub> H <sub>6</sub> O                | 2-Vinylfuran               | 1487-18-9 | 94  | 14.80  | <0.001 |
| C <sub>8</sub> H <sub>12</sub> O               | 2-Butylfuran               | 4466-24-4 | 124 | 22.29  | <0.001 |
| C <sub>9</sub> H <sub>14</sub> O               | 2-Pentylfuran              | 3777-69-3 | 138 | 26.17  | 0.003  |
| <b>Nitrogenated compounds</b>                  |                            |           |     |        |        |
| N <sub>2</sub>                                 | Nitrogen                   | 7727-37-9 | 28  | 1.48   | 0.940  |
| C <sub>2</sub> H <sub>3</sub> N                | Acetonitrile               | 75-05-8   | 41  | 6.52   | 0.011  |
| C <sub>3</sub> H <sub>5</sub> N                | Propargylamine             | 2450-71-7 | 55  | 9.03   | 0.001  |
| C <sub>4</sub> H <sub>5</sub> N                | Pyrrole                    | 109-97-7  | 67  | 14.18  | 0.012  |
| C <sub>2</sub> H <sub>5</sub> NO               | Acetamide                  | 60-35-5   | 59  | 14.73  | 0.022  |
| C <sub>5</sub> H <sub>5</sub> N                | Pyridine                   | 110-86-1  | 79  | 14.90  | 0.003  |
| C <sub>5</sub> H <sub>7</sub> N                | 3-Methyl-1H-pyrrole        | 616-43-3  | 81  | 14.76  | 0.001  |
| C <sub>3</sub> H <sub>5</sub> NO <sub>2</sub>  | 2-Oxo-propionamide         | x         | 87  | 16.78  | 0.019  |
| C <sub>6</sub> H <sub>9</sub> N                | 2,3-Dimethyl-1H-pyrrole    | 600-28-2  | 95  | 18.01  | 0.001  |
| C <sub>6</sub> H <sub>7</sub> N                | 2-Methylpyridine           | 109-06-8  | 93  | 18.34  | 0.002  |
| C <sub>3</sub> H <sub>4</sub> N <sub>2</sub>   | 1H-Pyrazole                | 288-13-1  | 68  | 22.20  | 0.011  |
| C <sub>4</sub> H <sub>7</sub> NO               | 2-Pyrrolidinone            | 616-45-5  | 85  | 25.60  | 0.101  |
| C <sub>6</sub> H <sub>8</sub> N <sub>2</sub> O | 2-Methoxy-6-methylpyrazine | 2882-21-5 | 124 | 27.03  | 0.009  |
| C <sub>4</sub> H <sub>5</sub> NO <sub>2</sub>  | Succinimide                | 123-56-8  | 99  | 27.98  | 0.061  |
| <b>Sulfonated compounds</b>                    |                            |           |     |        |        |
| H <sub>2</sub> S                               | Hydrogen sulfide           | 7783-06-4 | 34  | 2.89   | 0.010  |
| COS                                            | Carbonyl sulfide           | 463-58-1  | 60  | 3.31   | 0.007  |

|                                              |                    |           |     |       |        |
|----------------------------------------------|--------------------|-----------|-----|-------|--------|
| O <sub>2</sub> S                             | Sulfur dioxide     | 7446-09-5 | 64  | 4.94  | 0.126  |
| CH <sub>4</sub> S                            | Methanethiol       | 74-93-1   | 48  | 5.35  | 0.005  |
| CS <sub>2</sub>                              | Carbon disulfide   | 75-15-0   | 76  | 7.68  | 0.003  |
| C <sub>3</sub> H <sub>8</sub> S              | (Methylthio)ethane | 624-89-5  | 76  | 10.84 | 0.002  |
| C <sub>2</sub> H <sub>6</sub> S <sub>2</sub> | Dimethyl disulfide | 624-92-0  | 94  | 15.11 | 0.003  |
| C <sub>5</sub> H <sub>6</sub> S              | 2-Methylthiophene  | 554-14-3  | 98  | 16.38 | 0.001  |
| C <sub>5</sub> H <sub>6</sub> S              | 3-Methylthiophene  | 616-44-4  | 98  | 17.82 | 0.002  |
| C <sub>6</sub> H <sub>8</sub> S              | 2-Ethylthiophene   | 872-55-9  | 112 | 21.26 | 0.002  |
| <b>Inorganic compounds</b>                   |                    |           |     |       |        |
| <i>Oxides</i>                                |                    |           |     |       |        |
| CO <sub>2</sub>                              | Carbon dioxide     | 124-38-9  | 44  | 1.76  | 11.221 |
| H <sub>2</sub> O                             | Water              | 7732-18-5 | 18  | 2.89  | 80.193 |
| <i>Noble gases</i>                           |                    |           |     |       |        |
| Ar                                           | Argon              | 7440-37-1 | 40  | 1.45  | 0.002  |
| <i>Unknown compounds</i>                     |                    |           |     |       |        |
|                                              | Unknown            |           |     | 70.34 | 0.080  |
|                                              | Unknown            |           |     | 97.36 | 0.027  |

Note: <sup>1</sup>CAS/(NIST) – unique numerical identifier of chemical compounds included in the register Chemical Abstracts Service (<https://www.cas.org>) or NIST number (a unique number given to each spectrum in the NIST archive); <sup>2</sup>MW – nominal mass; <sup>3</sup>RT – retention time; <sup>4</sup>A – normalized area (the area ratio of the individual gas mixture components to the sum of the areas of all the components in the chromatogram).
