# Supplementary material
Source: MDPI journal article supplement (https://www.mdpi.com/2075-163X/11/10/1090)
Supplement: s1 [file s1]

Table S4. Results of GC–MS analysis of volatiles extracted by mechanical shock crushing from arsenopyrite (Blagodatnoye deposit, Yenisei ridge).

| Formula                                    | Name                       | <sup>1</sup> CAS/(NIST) | <sup>2</sup> MW | Arsenopyrite BKS-10  |                   |
|--------------------------------------------|----------------------------|-------------------------|-----------------|----------------------|-------------------|
|                                            |                            |                         |                 | <sup>3</sup> RT, min | <sup>4</sup> A, % |
| Aliphatic hydrocarbons                     |                            |                         |                 |                      |                   |
| Paraffins                                  |                            |                         |                 |                      |                   |
| CH4                                        | Methane                    | 74-82-8                 | 16              | 1.73                 | 3.503             |
| C3H8                                       | n-Propane                  | 74-98-6                 | 44              | 4.30                 | 0.003             |
| C4H10                                      | n-Butane                   | 106-97-8                | 58              | 5.88                 | 0.003             |
| C5H12                                      | n-Pentane                  | 109-66-0                | 72              | 7.73                 | 0.006             |
| C6H14                                      | n-Hexane                   | 110-54-3                | 86              | 11.21                | 0.066             |
| C7H16                                      | n-Heptane                  | 142-82-5                | 100             | 15.04                | 0.003             |
| C8H18                                      | n-Octane                   | 111-65-9                | 114             | 18.97                | 0.006             |
| C9H20                                      | n-Nonane                   | 111-84-2                | 128             | 22.75                | 0.008             |
| C10H22                                     | n-Decane                   | 124-18-5                | 142             | 26.24                | 0.004             |
| C11H24                                     | n-Undecane                 | 1120-21-4               | 156             | 29.51                | 0.003             |
| C12H26                                     | n-Dodecane                 | 112-40-3                | 170             | 32.52                | 0.002             |
| C13H28                                     | n-Tridecane                | 629-50-5                | 184             | 35.69                | 0.008             |
| C14H30                                     | n-Tetradecane              | 629-59-4                | 198             | 40.32                | 0.011             |
| C15H32                                     | n-Pentadecane              | 629-62-9                | 212             | 47.38                | 0.013             |
| Olefins                                    |                            |                         |                 |                      |                   |
| C4H8                                       | 2-Methyl-1-propene         | 115-11-7                | 56              | 5.58                 | 0.001             |
| C4H8                                       | 1-Butene                   | 106-98-9                | 56              | 5.71                 | 0.001             |
| C4H8                                       | 2-Butene                   | 107-01-7                | 56              | 5.76                 | 0.001             |
| C5H8                                       | (E)-1,3-Pentadiene         | 2004-70-8               | 68              | 7.98                 | <0.001            |
| C5H8                                       | 1,3-Pentadiene             | 504-60-9                | 68              | 8.09                 | <0.001            |
| C5H8                                       | (Z)-1,3-Pentadiene         | 1574-41-0               | 68              | 8.28                 | <0.001            |
| C6H12                                      | 1-Hexene                   | 592-41-6                | 84              | 10.96                | 0.052             |
| C6H12                                      | 2-Hexene                   | 592-43-8                | 84              | 11.12                | 0.017             |
| C6H12                                      | 3-Hexene                   | 592-47-2                | 84              | 11.29                | 0.004             |
| C6H10                                      | 2,3-Dimethyl-1,3-butadiene | 513-81-5                | 82              | 12.06                | 0.001             |
| C6H10                                      | 3-Hexyne                   | 928-49-4                | 82              | 12.32                | <0.001            |
| C6H10                                      | 1(E)-2-Methyl-3-pentadiene | 926-54-5                | 82              | 12.61                | <0.001            |
| C7H14                                      | 1-Heptene                  | 592-76-7                | 98              | 14.74                | 0.002             |
| C8H16                                      | 1-Octene                   | 111-66-0                | 112             | 18.70                | 0.001             |
| C9H18                                      | 1-Nonene                   | 124-11-8                | 126             | 22.50                | 0.002             |
| C10H20                                     | 1-Decene                   | 872-05-9                | 140             | 26.06                | 0.001             |
| C13H26                                     | 1-Tridecene                | 2437-56-1               | 182             | 35.55                | 0.005             |
| C14H28                                     | 1-Tetradecene              | 1120-36-1               | 196             | 40.05                | 0.007             |
| C15H30                                     | 1-Pentadecene              | 13360-61-7              | 210             | 47.01                | 0.014             |
| Cyclic hydrocarbons                        |                            |                         |                 |                      |                   |
| Cycloalkanes (naphthenes) and cycloalkenes |                            |                         |                 |                      |                   |
| C6H10                                      | 3-Methylcyclopentene       | 1120-62-3               | 82              | 11.44                | <0.001            |

|                                                |                                         |           |     |        |        |
|------------------------------------------------|-----------------------------------------|-----------|-----|--------|--------|
| C <sub>6</sub> H <sub>10</sub>                 | 4-Methylcyclopentene                    | 1759-81-5 | 82  | 11.76  | <0.001 |
| C <sub>6</sub> H <sub>12</sub>                 | Cyclohexane                             | 110-82-7  | 84  | 12.87  | 0.001  |
| <i>Arenes</i>                                  |                                         |           |     |        |        |
| C <sub>6</sub> H <sub>6</sub>                  | Benzene                                 | 71-43-2   | 78  | 11.92  | 0.070  |
| C <sub>7</sub> H <sub>8</sub>                  | Toluene                                 | 108-88-3  | 92  | 16.19  | 0.005  |
| C <sub>7</sub> H <sub>7</sub> F                | (Fluoromethyl)benzene                   | 350-50-5  | 110 | 19.63  | <0.001 |
| C <sub>8</sub> H <sub>10</sub>                 | Ethylbenzene                            | 100-41-4  | 106 | 20.08  | 0.003  |
| C <sub>8</sub> H <sub>10</sub>                 | p-Xylene                                | 106-42-3  | 106 | 20.37  | 0.011  |
| C <sub>8</sub> H <sub>10</sub>                 | o-Xylene                                | 95-47-6   | 106 | 20.58  | 0.002  |
| C <sub>8</sub> H <sub>10</sub>                 | m-Xylene                                | 108-38-3  | 106 | 20.65  | 0.002  |
| C <sub>8</sub> H <sub>8</sub>                  | Styrene                                 | 100-42-5  | 104 | 21.07  | 0.001  |
| C <sub>8</sub> H <sub>9</sub> F                | p-Fluoroethylbenzene                    | 459-47-2  | 124 | 22.81  | <0.001 |
| C <sub>9</sub> H <sub>12</sub>                 | Propylbenzene                           | 103-65-1  | 120 | 23.80  | 0.005  |
| C <sub>10</sub> H <sub>14</sub>                | Butylbenzene                            | 104-51-8  | 134 | 27.46  | 0.005  |
| C <sub>11</sub> H <sub>16</sub>                | Pentylbenzene                           | 538-68-1  | 148 | 30.76  | 0.006  |
| C <sub>12</sub> H <sub>18</sub>                | Hexylbenzene                            | 1077-16-3 | 162 | 33.89  | 0.004  |
| C <sub>13</sub> H <sub>20</sub>                | Heptylbenzene                           | 1078-71-3 | 176 | 37.77  | 0.006  |
| C <sub>14</sub> H <sub>22</sub>                | Octylbenzene                            | 2189-60-8 | 190 | 43.55  | 0.007  |
| C <sub>15</sub> H <sub>24</sub>                | Nonylbenzene                            | 1081-77-2 | 204 | 52.52  | 0.006  |
| C <sub>16</sub> H <sub>26</sub>                | Decylbenzene                            | 104-72-3  | 218 | 66.58  | 0.008  |
| <i>PAH (Polycyclic aromatic hydrocarbons)</i>  |                                         |           |     |        |        |
| C <sub>10</sub> H <sub>8</sub>                 | Naphthalene                             | 91-20-3   | 128 | 31.16  | 0.001  |
| C <sub>14</sub> H <sub>10</sub>                | Phenanthrene                            | 85-01-8   | 178 | 78.04  | 0.001  |
| <b>Oxygenated hydrocarbons</b>                 |                                         |           |     |        |        |
| <i>Alcohols</i>                                |                                         |           |     |        |        |
| CH <sub>4</sub> O                              | Methanol                                | 67-56-1   | 32  | 4.48   | 0.226  |
| C <sub>2</sub> H <sub>6</sub> O                | Ethanol                                 | 64-17-5   | 46  | 6.31   | 0.038  |
| C <sub>4</sub> H <sub>10</sub> O               | 1-Butanol                               | 71-36-3   | 74  | 12.57  | 0.004  |
| C <sub>6</sub> H <sub>6</sub> O                | Phenol                                  | 108-95-2  | 94  | 24.01  | 0.002  |
| <i>Ethers and esters</i>                       |                                         |           |     |        |        |
| C <sub>5</sub> H <sub>8</sub> O <sub>2</sub>   | Methyl methacrylate                     | 80-62-6   | 100 | 13.79  | 0.001  |
| C <sub>4</sub> H <sub>6</sub> O <sub>2</sub>   | Butyrolactone                           | 96-48-0   | 86  | 20.86  | 0.001  |
| C <sub>6</sub> H <sub>10</sub> O <sub>2</sub>  | γ-Hexalactone                           | 695-06-7  | 114 | 26.88  | 0.001  |
| C <sub>7</sub> H <sub>12</sub> O <sub>2</sub>  | γ-Heptalactone                          | 105-21-5  | 128 | 30.32  | 0.001  |
| C <sub>8</sub> H <sub>14</sub> O <sub>2</sub>  | γ-Octalactone                           | 104-50-7  | 142 | 33.57  | 0.001  |
| C <sub>9</sub> H <sub>16</sub> O <sub>2</sub>  | γ-Nonalactone                           | 104-61-0  | 156 | 37.39  | 0.001  |
| C <sub>10</sub> H <sub>18</sub> O <sub>2</sub> | γ-Decalactone                           | 706-14-9  | 170 | 42.97  | 0.002  |
| C <sub>11</sub> H <sub>20</sub> O <sub>2</sub> | γ-Undecalatone                          | 104-67-6  | 184 | 51.56  | 0.001  |
| C <sub>12</sub> H <sub>14</sub> O <sub>4</sub> | Diethyl Phthalate                       | 84-66-2   | 222 | 62.22  | 0.013  |
| C <sub>12</sub> H <sub>22</sub> O <sub>2</sub> | γ-Dodecalactone                         | 2305-05-7 | 198 | 65.02  | 0.003  |
| C <sub>16</sub> H <sub>22</sub> O <sub>4</sub> | Di-sec-butyl phthalate                  | (373654)  | 278 | 79.05  | 1.725  |
| C <sub>13</sub> H <sub>24</sub> O <sub>2</sub> | γ-Tridecalactone                        | x         | 212 | 86.11  | 0.002  |
| C <sub>14</sub> H <sub>26</sub> O <sub>2</sub> | γ-Tetradecalactone                      | x         | 226 | 119.89 | 0.012  |
| C <sub>16</sub> H <sub>22</sub> O <sub>4</sub> | Dibutyl phthalate                       | 84-74-2   | 278 | 124.69 | 0.008  |
| C <sub>17</sub> H <sub>30</sub> O <sub>4</sub> | 2-Heptyl isohexyl ester<br>fumaric acid | (348625)  | 298 | 130.35 | 0.006  |

|                                              |                           |            |     |        |        |
|----------------------------------------------|---------------------------|------------|-----|--------|--------|
| <i>Aldehydes</i>                             |                           |            |     |        |        |
| C <sub>2</sub> H <sub>4</sub> O              | Acetaldehyde              | 75-07-0    | 44  | 4.91   | 0.028  |
| C <sub>3</sub> H <sub>4</sub> O              | 2-Propenal                | 107-02-8   | 56  | 7.11   | 0.003  |
| C <sub>3</sub> H <sub>6</sub> O              | n-Propanal                | 123-38-6   | 58  | 7.31   | 0.002  |
| C <sub>4</sub> H <sub>6</sub> O              | 2-Methyl-2-propenal       | 78-85-3    | 70  | 9.38   | <0.001 |
| C <sub>4</sub> H <sub>8</sub> O              | 2-Methylpropanal          | 78-84-2    | 72  | 9.39   | 0.001  |
| C <sub>4</sub> H <sub>8</sub> O              | n-Butanal                 | 123-72-8   | 72  | 10.16  | 0.004  |
| C <sub>5</sub> H <sub>10</sub> O             | 3-Methylbutanal           | 590-86-3   | 86  | 13.11  | 0.002  |
| C <sub>5</sub> H <sub>10</sub> O             | n-Pentanal                | 110-62-3   | 86  | 14.07  | 0.004  |
| C <sub>5</sub> H <sub>4</sub> O <sub>2</sub> | Furfural                  | 98-01-1    | 96  | 17.00  | <0.001 |
| C <sub>5</sub> H <sub>4</sub> O <sub>2</sub> | 3-Furaldehyde             | 498-60-2   | 96  | 17.90  | 0.003  |
| C <sub>6</sub> H <sub>12</sub> O             | n-Hexanal                 | 66-25-1    | 100 | 18.22  | 0.011  |
| C <sub>7</sub> H <sub>14</sub> O             | n-Heptanal                | 111-71-7   | 114 | 22.21  | 0.004  |
| C <sub>7</sub> H <sub>6</sub> O              | Benzaldehyde              | 100-52-7   | 106 | 23.41  | 0.005  |
| C <sub>8</sub> H <sub>16</sub> O             | 2-Ethylhexanal            | 123-05-7   | 128 | 24.56  | 0.004  |
| C <sub>8</sub> H <sub>16</sub> O             | n-Octanal                 | 124-13-0   | 128 | 25.90  | 0.006  |
| C <sub>6</sub> H <sub>4</sub> O <sub>3</sub> | 2,5-Furandicarboxaldehyde | 823-82-5   | 124 | 27.33  | 0.002  |
| C <sub>9</sub> H <sub>18</sub> O             | n-Nonanal                 | 124-19-6   | 142 | 29.29  | 0.012  |
| C <sub>10</sub> H <sub>20</sub> O            | n-Decanal                 | 112-31-2   | 156 | 33.42  | 0.013  |
| C <sub>8</sub> H <sub>6</sub> O <sub>3</sub> | Piperonal                 | 120-57-0   | 150 | 37.19  | 0.976  |
| C <sub>14</sub> H <sub>28</sub> O            | n-Tetradecanal            | 124-25-4   | 212 | 58.42  | 0.017  |
| C <sub>15</sub> H <sub>30</sub> O            | n-Pentadecanal            | 2765-11-9  | 226 | 76.01  | 0.040  |
| C <sub>16</sub> H <sub>32</sub> O            | n-Hexadecanal             | 629-80-1   | 240 | 103.92 | 0.032  |
| <i>Ketones</i>                               |                           |            |     |        |        |
| C <sub>3</sub> H <sub>6</sub> O              | 2-Propanone               | 67-64-1    | 58  | 7.51   | 0.026  |
| C <sub>4</sub> H <sub>6</sub> O <sub>2</sub> | 2,3-Butanedione           | 431-03-8   | 86  | 10.24  | 0.003  |
| C <sub>4</sub> H <sub>8</sub> O              | 2-Butanone                | 78-93-3    | 72  | 10.36  | 0.006  |
| C <sub>5</sub> H <sub>10</sub> O             | 2-Pentanone               | 107-87-9   | 86  | 13.89  | 0.002  |
| C <sub>5</sub> H <sub>8</sub> O              | Cyclopentanone            | 120-92-3   | 84  | 16.69  | <0.001 |
| C <sub>6</sub> H <sub>12</sub> O             | 2-Hexanone                | 591-78-6   | 100 | 18.02  | 0.003  |
| C <sub>7</sub> H <sub>14</sub> O             | 2-Heptanone               | 110-43-0   | 114 | 21.95  | 0.003  |
| C <sub>8</sub> H <sub>16</sub> O             | 3-Octanone                | 106-68-3   | 128 | 24.81  | 0.002  |
| C <sub>8</sub> H <sub>16</sub> O             | 2-Octanone                | 111-13-7   | 128 | 25.60  | 0.006  |
| C <sub>9</sub> H <sub>18</sub> O             | 2-Nonanone                | 821-55-6   | 142 | 28.99  | 0.001  |
| C <sub>10</sub> H <sub>20</sub> O            | 2-Decanone                | 693-54-9   | 156 | 32.14  | 0.003  |
| C <sub>8</sub> H <sub>4</sub> O <sub>3</sub> | 1,3-Isobenzofurandione    | 85-44-9    | 148 | 35.14  | 0.009  |
| C <sub>11</sub> H <sub>22</sub> O            | 2-Undecanone              | 53452-70-3 | 170 | 35.24  | 0.004  |
| C <sub>12</sub> H <sub>24</sub> O            | 2-Dodecanone              | 6175-49-1  | 184 | 39.65  | 0.001  |
| C <sub>13</sub> H <sub>26</sub> O            | 2-Tridecanone             | 593-08-8   | 198 | 46.36  | 0.010  |
| C <sub>14</sub> H <sub>28</sub> O            | 2-Tetradecanone           | 2345-27-9  | 212 | 56.29  | 0.011  |
| C <sub>15</sub> H <sub>30</sub> O            | 2-Pentadecanone           | 2345-28-0  | 226 | 73.32  | 0.027  |
| C <sub>16</sub> H <sub>32</sub> O            | 2-Hexadecanone            | 18787-63-8 | 240 | 99.47  | 0.010  |
| <i>Carboxylic acids</i>                      |                           |            |     |        |        |
| CH <sub>2</sub> O <sub>2</sub>               | Formic acid               | 64-18-6    | 46  | 6.33   | 0.006  |

|                                                |                                        |           |     |       |        |
|------------------------------------------------|----------------------------------------|-----------|-----|-------|--------|
| C <sub>2</sub> H <sub>4</sub> O <sub>2</sub>   | Acetic acid                            | 64-19-7   | 60  | 10.94 | 0.053  |
| C <sub>3</sub> H <sub>6</sub> O <sub>2</sub>   | n-Propanoic acid                       | 79-09-4   | 74  | 14.69 | 0.001  |
| C <sub>4</sub> H <sub>8</sub> O <sub>2</sub>   | n-Butanoic acid                        | 107-92-6  | 88  | 18.18 | 0.036  |
| C <sub>5</sub> H <sub>10</sub> O <sub>2</sub>  | 3-Methylbutanoic acid                  | 503-74-2  | 102 | 21.05 | 0.003  |
| C <sub>5</sub> H <sub>10</sub> O <sub>2</sub>  | n-Pentanoic acid                       | 109-52-4  | 102 | 22.06 | 0.013  |
| C <sub>6</sub> H <sub>12</sub> O <sub>2</sub>  | n-Hexanoic acid                        | 142-62-1  | 116 | 25.48 | 0.043  |
| C <sub>7</sub> H <sub>14</sub> O <sub>2</sub>  | n-Heptanoic acid                       | 111-14-8  | 130 | 28.79 | 0.010  |
| C <sub>8</sub> H <sub>16</sub> O <sub>2</sub>  | n-Octanoic acid                        | 124-07-2  | 144 | 31.79 | 0.028  |
| C <sub>9</sub> H <sub>18</sub> O <sub>2</sub>  | n-Nonanoic acid                        | 112-05-0  | 158 | 34.77 | 0.029  |
| C <sub>10</sub> H <sub>20</sub> O <sub>2</sub> | n-Decanoic acid                        | 334-48-5  | 172 | 38.85 | 0.021  |
| C <sub>11</sub> H <sub>22</sub> O <sub>2</sub> | n-Undecanoic acid                      | 112-37-8  | 186 | 45.10 | 0.004  |
| C <sub>12</sub> H <sub>24</sub> O <sub>2</sub> | n-Dodecanoic acid                      | 143-07-7  | 200 | 54.89 | 0.021  |
| C <sub>14</sub> H <sub>28</sub> O <sub>2</sub> | n-Tetradecanoic acid                   | 544-63-8  | 228 | 94.86 | 0.030  |
| <b>Heterocyclic compounds</b>                  |                                        |           |     |       |        |
| <i>Dioxanes</i>                                |                                        |           |     |       |        |
| C <sub>4</sub> H <sub>8</sub> O <sub>2</sub>   | 1,4-Dioxane                            | 123-91-1  | 88  | 13.19 | <0.001 |
| <i>Furans</i>                                  |                                        |           |     |       |        |
| C <sub>5</sub> H <sub>6</sub> O                | 2-Methylfuran                          | 534-22-5  | 82  | 9.81  | <0.001 |
| C <sub>5</sub> H <sub>6</sub> O                | 3-Methylfuran                          | 930-27-8  | 82  | 9.86  | <0.001 |
| C <sub>6</sub> H <sub>8</sub> O                | 2,5-Dimethylfuran                      | 625-86-5  | 96  | 13.37 | <0.001 |
| C <sub>9</sub> H <sub>14</sub> O               | 2-Pentylfuran                          | 3777-69-3 | 138 | 24.93 | <0.001 |
| <b>Nitrogenated compounds</b>                  |                                        |           |     |       |        |
| N <sub>2</sub>                                 | Nitrogen                               | 7727-37-9 | 28  | 1.77  | 1.140  |
| H <sub>3</sub> N                               | Ammonia                                | 7664-41-7 | 17  | 2.96  | 0.046  |
| C <sub>2</sub> H <sub>3</sub> N                | Acetonitrile                           | 75-05-8   | 41  | 6.84  | 0.010  |
| C <sub>3</sub> H <sub>5</sub> N                | Propargylamine                         | 2450-71-7 | 55  | 9.26  | <0.001 |
| C <sub>4</sub> H <sub>5</sub> N                | Pyrrole                                | 109-97-7  | 67  | 14.14 | 0.001  |
| C <sub>5</sub> H <sub>5</sub> N                | Pyridine                               | 110-86-1  | 79  | 15.27 | <0.001 |
| C <sub>2</sub> H <sub>5</sub> NO               | Acetamide                              | 60-35-5   | 59  | 16.39 | 0.004  |
| C <sub>3</sub> H <sub>5</sub> NO <sub>2</sub>  | 2-Oxo-propionamide                     | x         | 87  | 17.19 | 0.002  |
| C <sub>6</sub> H <sub>9</sub> N                | 2,3-Dimethyl-1H-pyrrole                | 600-28-2  | 95  | 17.94 | <0.001 |
| C <sub>6</sub> H <sub>7</sub> N                | 2-Methylpyridine                       | 109-06-8  | 93  | 18.42 | <0.001 |
| C <sub>6</sub> H <sub>7</sub> N                | 3-Methylpyridine                       | 108-99-6  | 93  | 20.15 | <0.001 |
| C <sub>4</sub> H <sub>5</sub> NO <sub>2</sub>  | Succinimide                            | 123-56-8  | 99  | 28.58 | 0.002  |
| C <sub>6</sub> H <sub>13</sub> NO              | Hexanamide                             | 628-02-4  | 115 | 30.47 | 0.001  |
| C <sub>7</sub> H <sub>15</sub> NO              | Heptanamide                            | 628-62-6  | 129 | 33.57 | <0.001 |
| C <sub>8</sub> H <sub>17</sub> NO              | Octanamide                             | 629-01-6  | 143 | 37.29 | 0.001  |
| C <sub>9</sub> H <sub>19</sub> NO              | Nonanamide                             | 1120-07-6 | 157 | 42.63 | 0.001  |
| C <sub>8</sub> H <sub>13</sub> NO              | 4-Cyclopropyl-4-methylpyrrolidin-2-one | (461078)  | 139 | 49.89 | 0.002  |
| C <sub>10</sub> H <sub>21</sub> NO             | Decanamide                             | 2319-29-1 | 171 | 50.89 | 0.002  |
| C <sub>12</sub> H <sub>25</sub> NO             | Dodecanamide                           | 1120-16-7 | 199 | 84.18 | 0.001  |
| <b>Sulfonated compounds</b>                    |                                        |           |     |       |        |
| H <sub>2</sub> S                               | Hydrogen sulfide                       | 7783-06-4 | 34  | 2.76  | 0.014  |
| COS                                            | Carbonyl sulfide                       | 463-58-1  | 60  | 3.31  | 0.002  |

|                                              |                    |            |     |       |        |
|----------------------------------------------|--------------------|------------|-----|-------|--------|
| O <sub>2</sub> S                             | Sulfur dioxide     | 7446-09-5  | 64  | 4.61  | 0.217  |
| CH <sub>4</sub> S                            | Methanethiol       | 74-93-1    | 48  | 5.38  | 0.002  |
| CS <sub>2</sub>                              | Carbon disulfide   | 75-15-0    | 76  | 7.51  | 0.004  |
| C <sub>4</sub> H <sub>4</sub> S              | Thiophene          | 110-02-1   | 84  | 11.74 | <0.001 |
| C <sub>2</sub> H <sub>6</sub> S <sub>2</sub> | Dimethyl disulfide | 624-92-0   | 94  | 14.67 | <0.001 |
| C <sub>5</sub> H <sub>6</sub> S              | 2-Methylthiophene  | 554-14-3   | 98  | 15.74 | 0.001  |
| C <sub>5</sub> H <sub>6</sub> S              | 3-Methylthiophene  | 616-44-4   | 98  | 16.09 | 0.001  |
| C <sub>10</sub> H <sub>16</sub> S            | 2-Hexylthiophene   | 18794-77-9 | 168 | 33.74 | 0.001  |
| <b>Inorganic compounds</b>                   |                    |            |     |       |        |
| <i>Oxides</i>                                |                    |            |     |       |        |
| CO <sub>2</sub>                              | Carbon dioxide     | 124-38-9   | 44  | 1.95  | 1.484  |
| H <sub>2</sub> O                             | Water              | 7732-18-5  | 18  | 3.16  | 89.515 |
| <i>Noble gases</i>                           |                    |            |     |       |        |
| Ar                                           | Argon              | 7440-37-1  | 40  | 1.72  | 0.006  |

Note: <sup>1</sup>CAS/(NIST) – unique numerical identifier of chemical compounds included in the register Chemical Abstracts Service (<https://www.cas.org>) or NIST number (a unique number given to each spectrum in the NIST archive); <sup>2</sup>MW – nominal mass; <sup>3</sup>RT – retention time; <sup>4</sup>A – normalized area (the area ratio of the individual gas mixture components to the sum of the areas of all the components in the chromatogram).
