# Supplementary material
Source: MDPI journal article supplement (https://www.mdpi.com/2075-163X/11/10/1090)
Supplement: s1 [file s1]

Table S10. Results of GC–MS analysis of volatiles extracted by mechanical shock crushing from pyrite (Blagodatnoye deposit, Yenisei ridge).

| Formula                                    | Name               | <sup>1</sup> CAS | <sup>2</sup> MW | Pyrite 100/216.5     |                   |
|--------------------------------------------|--------------------|------------------|-----------------|----------------------|-------------------|
|                                            |                    |                  |                 | <sup>3</sup> RT, min | <sup>4</sup> A, % |
| Aliphatic hydrocarbons                     |                    |                  |                 |                      |                   |
| Paraffins                                  |                    |                  |                 |                      |                   |
| CH4                                        | Methane            | 74-82-8          | 16              | 1.72                 | 1.207             |
| C2H6                                       | Ethane             | 74-84-0          | 30              | 2.70                 | 0.001             |
| C6H14                                      | n-Hexane           | 110-54-3         | 86              | 12.02                | 0.011             |
| C7H16                                      | n-Heptane          | 142-82-5         | 100             | 16.05                | 0.005             |
| C8H18                                      | n-Octane           | 111-65-9         | 114             | 20.15                | 0.008             |
| C9H20                                      | n-Nonane           | 111-84-2         | 128             | 24.03                | 0.008             |
| C10H22                                     | n-Decane           | 124-18-5         | 142             | 27.61                | 0.006             |
| C11H24                                     | n-Undecane         | 1120-21-4        | 156             | 30.94                | 0.007             |
| C12H26                                     | n-Dodecane         | 112-40-3         | 170             | 34.05                | 0.004             |
| C13H28                                     | n-Tridecane        | 629-50-5         | 184             | 38.03                | 0.006             |
| C14H30                                     | n-Tetradecane      | 629-59-4         | 198             | 44.10                | 0.007             |
| C15H32                                     | n-Pentadecane      | 629-62-9         | 212             | 53.57                | 0.014             |
| Halogenated paraffins                      |                    |                  |                 |                      |                   |
| C4H9Cl                                     | 1-Chlorobutane     | 109-69-3         | 92              | 12.64                | 0.003             |
| Olefins                                    |                    |                  |                 |                      |                   |
| C2H2                                       | Acetylene          | 74-86-2          | 26              | 2.22                 | 0.002             |
| C2H4                                       | Ethylene           | 74-85-1          | 28              | 2.43                 | 0.006             |
| C4H8                                       | 2-Methyl-1-propene | 115-11-7         | 56              | 5.93                 | 0.017             |
| C4H8                                       | 2-Butene           | 107-01-7         | 56              | 6.15                 | 0.004             |
| C5H10                                      | 2-Methyl-2-butene  | 513-35-9         | 70              | 8.29                 | 0.004             |
| C5H8                                       | 1,3-Pentadiene     | 1574-41-0        | 68              | 8.54                 | 0.007             |
| C5H8                                       | (E)-1,3-Pentadiene | 2004-70-8        | 68              | 8.64                 | 0.001             |
| C5H8                                       | (Z)-1,3-Pentadiene | 1574-41-0        | 68              | 9.04                 | <0.001            |
| C6H12                                      | 1-Hexene           | 592-41-6         | 84              | 11.67                | 0.004             |
| C7H14                                      | 1-Heptene          | 592-76-7         | 98              | 15.70                | 0.003             |
| C8H16                                      | (Z)-3-Octene       | 14850-22-7       | 112             | 19.55                | 0.001             |
| C8H16                                      | (E)-2-Octene       | 13389-42-9       | 112             | 19.72                | 0.001             |
| C8H16                                      | (Z)-2-Octene       | 7642-04-8        | 112             | 19.83                | 0.002             |
| C8H16                                      | 1-Octene           | 111-66-0         | 112             | 19.95                | 0.002             |
| C9H18                                      | 1-Nonene           | 124-11-8         | 126             | 23.75                | 0.001             |
| C10H20                                     | 1-Decene           | 872-05-9         | 140             | 27.39                | 0.002             |
| C11H22                                     | 1-Undecene         | 821-95-4         | 154             | 30.74                | 0.002             |
| C12H24                                     | 1-Dodecene         | 112-41-4         | 168             | 33.89                | 0.001             |
| C13H26                                     | 1-Tridecene        | 2437-56-1        | 182             | 37.79                | 0.004             |
| C14H28                                     | 1-Tetradecene      | 1120-36-1        | 196             | 43.68                | 0.004             |
| C15H30                                     | 1-Pentadecene      | 13360-61-7       | 210             | 52.97                | 0.025             |
| Cyclic hydrocarbons                        |                    |                  |                 |                      |                   |
| Cycloalkanes (naphthenes) and cycloalkenes |                    |                  |                 |                      |                   |
| C5H10                                      | Cyclopentane       | 287-92-3         | 70              | 8.66                 | 0.003             |

|                                                |                                             |           |     |        |        |
|------------------------------------------------|---------------------------------------------|-----------|-----|--------|--------|
| C <sub>6</sub> H <sub>12</sub>                 | Cyclohexane                                 | 110-82-7  | 84  | 15.74  | 0.002  |
| <i>Arenes</i>                                  |                                             |           |     |        |        |
| C <sub>6</sub> H <sub>6</sub>                  | Benzene                                     | 71-43-2   | 78  | 12.59  | 0.017  |
| C <sub>7</sub> H <sub>8</sub>                  | Toluene)                                    | 108-88-3  | 92  | 17.04  | 0.003  |
| C <sub>7</sub> H <sub>7</sub> F                | (Fluoromethyl)benzene                       | 350-50-5  | 110 | 20.70  | <0.001 |
| C <sub>8</sub> H <sub>10</sub>                 | Ethylbenzene                                | 100-41-4  | 106 | 21.08  | 0.002  |
| C <sub>8</sub> H <sub>10</sub>                 | p-Xylene                                    | 106-42-3  | 106 | 21.35  | 0.004  |
| C <sub>8</sub> H <sub>10</sub>                 | o-Xylene                                    | 95-47-6   | 106 | 21.53  | <0.001 |
| C <sub>8</sub> H <sub>10</sub>                 | m-Xylene                                    | 108-38-3  | 106 | 21.60  | <0.001 |
| C <sub>8</sub> H <sub>8</sub>                  | Styrene                                     | 100-42-5  | 104 | 22.00  | 0.001  |
| C <sub>9</sub> H <sub>12</sub>                 | Propylbenzene                               | 103-65-1  | 120 | 24.90  | 0.005  |
| C <sub>10</sub> H <sub>14</sub>                | Butylbenzene                                | 104-51-8  | 134 | 28.66  | 0.010  |
| C <sub>11</sub> H <sub>16</sub>                | Pentylbenzene                               | 538-68-1  | 148 | 32.06  | 0.011  |
| C <sub>12</sub> H <sub>18</sub>                | Hexylbenzene                                | 1077-16-3 | 162 | 35.52  | 0.003  |
| C <sub>13</sub> H <sub>20</sub>                | Heptylbenzene                               | 1078-71-3 | 176 | 40.40  | 0.003  |
| C <sub>14</sub> H <sub>22</sub>                | Octylbenzene                                | 2189-60-8 | 190 | 59.58  | 0.002  |
| <b>Oxygenated hydrocarbons</b>                 |                                             |           |     |        |        |
| <i>Alcohols</i>                                |                                             |           |     |        |        |
| CH <sub>4</sub> O                              | Methanol                                    | 67-56-1   | 32  | 4.48   | 0.088  |
| C <sub>2</sub> H <sub>6</sub> O                | Ethanol                                     | 64-17-5   | 46  | 6.35   | 0.003  |
| C <sub>3</sub> H <sub>8</sub> O                | Isopropyl Alcohol                           | 67-63-0   | 60  | 8.04   | <0.001 |
| C <sub>3</sub> H <sub>8</sub> O                | 1-Propanol                                  | 71-23-8   | 60  | 9.11   | 0.002  |
| C <sub>4</sub> H <sub>10</sub> O               | 1-Butanol                                   | 71-36-3   | 74  | 12.91  | 0.018  |
| C <sub>6</sub> H <sub>6</sub> O                | Phenol                                      | 108-95-2  | 94  | 24.73  | 0.003  |
| C <sub>7</sub> H <sub>8</sub> O                | 3-Methylphenol                              | 108-39-4  | 108 | 27.44  | <0.001 |
| C <sub>7</sub> H <sub>8</sub> O                | 4-Methylphenol                              | 106-44-5  | 108 | 28.28  | 0.001  |
| <i>Ethers and esters</i>                       |                                             |           |     |        |        |
| C <sub>5</sub> H <sub>8</sub> O <sub>2</sub>   | Methyl methacrylate                         | 80-62-6   | 100 | 14.45  | <0.001 |
| C <sub>7</sub> H <sub>12</sub> O <sub>2</sub>  | γ-Heptalactone                              | 105-21-5  | 128 | 31.07  | <0.001 |
| C <sub>8</sub> H <sub>14</sub> O <sub>2</sub>  | γ-Octalactone                               | 104-50-7  | 142 | 34.54  | 0.004  |
| C <sub>9</sub> H <sub>16</sub> O <sub>2</sub>  | γ-Nonalactone                               | 104-61-0  | 156 | 39.05  | 0.002  |
| C <sub>10</sub> H <sub>18</sub> O <sub>2</sub> | γ-Decalactone                               | 706-14-9  | 170 | 45.86  | 0.004  |
| C <sub>12</sub> H <sub>16</sub> O <sub>2</sub> | Pentyl ester benzoic acid                   | 2049-96-9 | 192 | 49.48  | 0.014  |
| C <sub>13</sub> H <sub>18</sub> O <sub>2</sub> | Hexyl ester benzoic acid                    | 6789-88-4 | 206 | 59.18  | 0.007  |
| C <sub>12</sub> H <sub>14</sub> O <sub>4</sub> | Diethyl phthalate                           | 84-66-2   | 222 | 69.49  | 0.038  |
| C <sub>12</sub> H <sub>22</sub> O <sub>2</sub> | γ-Dodecalactone                             | 2305-05-7 | 198 | 73.60  | 0.011  |
| C <sub>14</sub> H <sub>18</sub> O <sub>4</sub> | Dipropyl ester 1,2-benzenedicarboxylic acid | 131-16-8  | 250 | 111.32 | 0.080  |
| <i>Aldehydes</i>                               |                                             |           |     |        |        |
| C <sub>2</sub> H <sub>4</sub> O                | Acetaldehyde                                | 75-07-0   | 44  | 5.26   | 0.030  |
| C <sub>3</sub> H <sub>4</sub> O                | 2-Propenal                                  | 107-02-8  | 56  | 7.24   | 0.007  |
| C <sub>3</sub> H <sub>6</sub> O                | n-Propanal                                  | 123-38-6  | 58  | 7.46   | 0.020  |
| C <sub>4</sub> H <sub>6</sub> O                | 2-Methyl-2-propenal                         | 78-85-3   | 70  | 9.73   | 0.003  |

|                                               |                                |            |     |       |        |
|-----------------------------------------------|--------------------------------|------------|-----|-------|--------|
| C <sub>4</sub> H <sub>8</sub> O               | 2-Methylpropanal               | 78-84-2    | 72  | 9.74  | 0.001  |
| C <sub>4</sub> H <sub>8</sub> O               | n-Butanal                      | 123-72-8   | 72  | 10.54 | 0.003  |
| C <sub>5</sub> H <sub>10</sub> O              | 3-Methylbutanal                | 590-86-3   | 86  | 13.67 | 0.004  |
| C <sub>5</sub> H <sub>10</sub> O              | n-Pentanal                     | 110-62-3   | 86  | 14.65 | 0.001  |
| C <sub>5</sub> H <sub>4</sub> O <sub>2</sub>  | Furfural                       | 98-01-1    | 96  | 17.45 | <0.001 |
| C <sub>6</sub> H <sub>10</sub> O              | 2-Methyl-2-pentenal            | 623-36-9   | 98  | 18.10 | <0.001 |
| C <sub>5</sub> H <sub>4</sub> O <sub>2</sub>  | 3-Furaldehyde                  | 498-60-2   | 96  | 18.32 | 0.003  |
| C <sub>6</sub> H <sub>12</sub> O              | n-Hexanal                      | 66-25-1    | 100 | 19.00 | 0.008  |
| C <sub>7</sub> H <sub>14</sub> O              | n-Heptanal                     | 111-71-7   | 114 | 23.13 | 0.004  |
| C <sub>6</sub> H <sub>6</sub> O <sub>2</sub>  | 5-Methyl-2-furancarboxaldehyde | 620-02-0   | 110 | 23.38 | 0.001  |
| C <sub>6</sub> H <sub>4</sub> O <sub>3</sub>  | 2,5-Furandicarboxaldehyde      | 823-82-5   | 124 | 27.74 | 0.002  |
| C <sub>7</sub> H <sub>6</sub> O               | Benzaldehyde                   | 100-52-7   | 106 | 24.10 | 0.011  |
| C <sub>8</sub> H <sub>16</sub> O              | 2-Ethylhexanal                 | 123-05-7   | 128 | 25.61 | 0.038  |
| C <sub>8</sub> H <sub>16</sub> O              | n-Octanal                      | 124-13-0   | 128 | 26.94 | 0.010  |
| C <sub>9</sub> H <sub>18</sub> O              | n-Nonanal                      | 124-19-6   | 142 | 30.44 | 0.013  |
| C <sub>10</sub> H <sub>20</sub> O             | n-Decanal                      | 112-31-2   | 156 | 33.67 | 0.018  |
| C <sub>11</sub> H <sub>22</sub> O             | n-Undecanal                    | 112-44-7   | 170 | 37.60 | 0.006  |
| C <sub>12</sub> H <sub>24</sub> O             | n-Dodecanal                    | 112-54-9   | 184 | 43.45 | 0.007  |
| C <sub>11</sub> H <sub>14</sub> O             | Benzenepentanal                | 36884-28-3 | 162 | 45.60 | 0.002  |
| C <sub>14</sub> H <sub>28</sub> O             | n-Tetradecanal                 | 124-25-4   | 212 | 67.13 | 0.016  |
| C <sub>15</sub> H <sub>30</sub> O             | n-Pentadecanal                 | 2765-11-9  | 226 | 90.84 | 0.020  |
| <i>Ketones</i>                                |                                |            |     |       |        |
| C <sub>3</sub> H <sub>6</sub> O               | 2-Propanone                    | 67-64-1    | 58  | 7.63  | 0.015  |
| C <sub>4</sub> H <sub>6</sub> O <sub>2</sub>  | 2,3-Butanedione                | 431-03-8   | 86  | 10.62 | 0.001  |
| C <sub>4</sub> H <sub>8</sub> O               | 2-Butanone                     | 78-93-3    | 72  | 10.69 | 0.001  |
| C <sub>5</sub> H <sub>10</sub> O              | 2-Pentanone                    | 107-87-9   | 86  | 14.45 | 0.002  |
| C <sub>6</sub> H <sub>12</sub> O              | 2-Hexanone                     | 591-78-6   | 100 | 18.73 | 0.001  |
| C <sub>7</sub> H <sub>14</sub> O              | 2-Heptanone                    | 110-43-0   | 114 | 22.83 | 0.003  |
| C <sub>8</sub> H <sub>16</sub> O              | 2-Octanone                     | 111-13-7   | 128 | 26.64 | 0.002  |
| C <sub>9</sub> H <sub>18</sub> O              | 2-Nonanone                     | 821-55-6   | 142 | 30.13 | 0.001  |
| C <sub>10</sub> H <sub>20</sub> O             | 2-Decanone                     | 693-54-9   | 156 | 33.34 | 0.002  |
| C <sub>8</sub> H <sub>4</sub> O <sub>3</sub>  | 1,3-Isobenzofurandione         | 85-44-9    | 148 | 35.94 | 0.022  |
| C <sub>11</sub> H <sub>22</sub> O             | 2-Undecanone                   | 53452-70-3 | 170 | 37.09 | 0.006  |
| C <sub>12</sub> H <sub>24</sub> O             | 2-Dodecanone                   | 6175-49-1  | 184 | 42.68 | 0.003  |
| C <sub>13</sub> H <sub>26</sub> O             | 2-Tridecanone                  | 593-08-8   | 198 | 51.37 | 0.010  |
| C <sub>14</sub> H <sub>28</sub> O             | 2-Tetradecanone                | 2345-27-9  | 212 | 64.96 | 0.010  |
| C <sub>15</sub> H <sub>30</sub> O             | 2-Pentadecanone                | 2345-28-0  | 226 | 87.03 | 0.030  |
| <i>Carboxylic acids</i>                       |                                |            |     |       |        |
| C <sub>2</sub> H <sub>4</sub> O <sub>2</sub>  | Acetic acid                    | 64-19-7    | 60  | 11.36 | 0.052  |
| C <sub>3</sub> H <sub>6</sub> O <sub>2</sub>  | n-Propanoic acid               | 79-09-4    | 74  | 15.39 | 0.001  |
| C <sub>4</sub> H <sub>8</sub> O <sub>2</sub>  | n-Butanoic acid                | 107-92-6   | 88  | 19.03 | 0.022  |
| C <sub>5</sub> H <sub>10</sub> O <sub>2</sub> | 3-Methylbutanoic acid          | 503-74-2   | 102 | 22.07 | 0.002  |
| C <sub>5</sub> H <sub>10</sub> O <sub>2</sub> | n-Pentanoic acid               | 109-52-4   | 102 | 23.06 | 0.006  |

|                                                |                         |            |     |        |        |
|------------------------------------------------|-------------------------|------------|-----|--------|--------|
| C <sub>6</sub> H <sub>12</sub> O <sub>2</sub>  | n-Hexanoic acid         | 142-62-1   | 116 | 26.49  | 0.045  |
| C <sub>7</sub> H <sub>14</sub> O <sub>2</sub>  | n-Heptanoic acid        | 111-14-8   | 130 | 29.98  | 0.009  |
| C <sub>8</sub> H <sub>16</sub> O <sub>2</sub>  | n-Octanoic acid         | 124-07-2   | 144 | 32.89  | 0.178  |
| C <sub>9</sub> H <sub>18</sub> O <sub>2</sub>  | n-Nonanoic acid         | 112-05-0   | 158 | 36.60  | 0.011  |
| C <sub>10</sub> H <sub>20</sub> O <sub>2</sub> | n-Decanoic acid         | 334-48-5   | 172 | 41.65  | 0.094  |
| C <sub>12</sub> H <sub>24</sub> O <sub>2</sub> | n-Dodecanoic acid       | 143-07-7   | 200 | 62.06  | 0.204  |
| C <sub>14</sub> H <sub>28</sub> O <sub>2</sub> | n-Tetradecanoic acid    | 544-63-8   | 228 | 118.88 | 0.043  |
| <b>Heterocyclic compounds</b>                  |                         |            |     |        |        |
| <i>Dioxanes</i>                                |                         |            |     |        |        |
| C <sub>4</sub> H <sub>8</sub> O <sub>2</sub>   | 1,4-Dioxane             | 123-91-1   | 88  | 13.69  | 0.001  |
| <i>Furans</i>                                  |                         |            |     |        |        |
| C <sub>5</sub> H <sub>6</sub> O                | 2-Methylfuran           | 534-22-5   | 82  | 10.31  | 0.001  |
| C <sub>5</sub> H <sub>6</sub> O                | 3-Methylfuran           | 930-27-8   | 82  | 10.57  | <0.001 |
| C <sub>6</sub> H <sub>8</sub> O                | 2-Ethylfuran            | 3208-16-0  | 96  | 14.14  | <0.001 |
| C <sub>9</sub> H <sub>14</sub> O               | 2-Pentylfuran           | 3777-69-3  | 138 | 26.10  | 0.001  |
| <b>Nitrogenated compounds</b>                  |                         |            |     |        |        |
| N <sub>2</sub>                                 | Nitrogen                | 7727-37-9  | 28  | 1.62   | 0.608  |
| H <sub>3</sub> N                               | Ammonia                 | 7664-41-7  | 17  | 2.86   | 0.025  |
| C <sub>2</sub> H <sub>3</sub> N                | Acetonitrile            | 75-05-8    | 41  | 6.88   | 0.003  |
| C <sub>3</sub> H <sub>5</sub> N                | Propargylamine          | 2450-71-7  | 55  | 9.43   | <0.001 |
| C <sub>4</sub> H <sub>5</sub> N                | Pyrrole                 | 109-97-7   | 67  | 14.62  | 0.001  |
| C <sub>5</sub> H <sub>5</sub> N                | Pyridine                | 110-86-1   | 79  | 15.52  | 0.001  |
| C <sub>3</sub> H <sub>5</sub> NO <sub>2</sub>  | 2-Oxo-propionamide      | x          | 87  | 17.44  | 0.004  |
| C <sub>6</sub> H <sub>9</sub> N                | 2,3-Dimethyl-1H-pyrrole | 600-28-2   | 95  | 18.45  | <0.001 |
| C <sub>6</sub> H <sub>7</sub> N                | 2-Methylpyridine        | 109-06-8   | 93  | 18.83  | <0.001 |
| C <sub>6</sub> H <sub>7</sub> N                | 3-Methylpyridine        | 108-99-6   | 93  | 20.55  | <0.001 |
| C <sub>6</sub> H <sub>7</sub> N                | 4-Methylpyridine        | 108-89-4   | 93  | 20.67  | <0.001 |
| C <sub>8</sub> H <sub>19</sub> N               | 3-Octanamine            | 24552-04-3 | 129 | 25.81  | 0.001  |
| C <sub>4</sub> H <sub>5</sub> NO <sub>2</sub>  | Succinimide             | 123-56-8   | 99  | 28.86  | 0.003  |
| C <sub>6</sub> H <sub>13</sub> NO              | Hexanamide              | 628-02-4   | 115 | 38.70  | 0.005  |
| C <sub>9</sub> H <sub>19</sub> NO              | Nonanamide              | x          | 157 | 55.42  | 0.004  |
| C <sub>11</sub> H <sub>23</sub> NO             | Undecanamide            | x          | 185 | 97.62  | 0.009  |
| <b>Sulfonated compounds</b>                    |                         |            |     |        |        |
| H <sub>2</sub> S                               | Hydrogen sulfide        | 7783-06-4  | 34  | 2.86   | 0.022  |
| COS                                            | Carbonyl sulfide        | 463-58-1   | 60  | 3.51   | 0.004  |
| O <sub>2</sub> S                               | Sulfur dioxide          | 7446-09-5  | 64  | 5.06   | 0.576  |
| CH <sub>4</sub> S                              | Methanethiol            | 74-93-1    | 48  | 5.06   | 0.144  |
| CS <sub>2</sub>                                | Carbon disulfide        | 75-15-0    | 76  | 7.84   | 0.008  |
| C <sub>2</sub> H <sub>6</sub> S <sub>2</sub>   | Dimethyl disulfide      | 624-92-0   | 94  | 15.35  | <0.001 |
| C <sub>5</sub> H <sub>6</sub> S                | 2-Methylthiophene       | 554-14-3   | 98  | 16.54  | 0.001  |
| C <sub>5</sub> H <sub>6</sub> S                | 3-Methylthiophene       | 616-44-4   | 98  | 16.89  | 0.018  |
| <b>Inorganic compounds</b>                     |                         |            |     |        |        |
| <i>Oxides</i>                                  |                         |            |     |        |        |
| CO <sub>2</sub>                                | Carbon dioxide          | 124-38-9   | 44  | 1.88   | 1.533  |
| H <sub>2</sub> O                               | Water                   | 7732-18-5  | 18  | 3.21   | 94.294 |
| <i>Noble gases</i>                             |                         |            |     |        |        |

|    |       |           |    |      |       |
|----|-------|-----------|----|------|-------|
| Ar | Argon | 7440-37-1 | 40 | 1.60 | 0.009 |
|----|-------|-----------|----|------|-------|

Note: <sup>1</sup>CAS – unique numerical identifier of chemical compounds included in the register Chemical Abstracts Service (<https://www.cas.org>); <sup>2</sup>MW – nominal mass; <sup>3</sup>RT – retention time; <sup>4</sup>A – normalized area (the area ratio of the individual gas mixture components to the sum of the areas of all the components in the chromatogram).
