# Supplementary material
Source: MDPI journal article supplement (https://www.mdpi.com/2075-163X/11/10/1090)
Supplement: s1 [file s1]

Table S3. Results of GC–MS analysis of volatiles extracted by mechanical shock crushing from arsenopyrite (Blagodatnoye deposit, Yenisei ridge).

| Formula                | Name                       | <sup>1</sup> CAS | <sup>2</sup> MW | Arsenopyrite 7/96.0  |                   |
|------------------------|----------------------------|------------------|-----------------|----------------------|-------------------|
|                        |                            |                  |                 | <sup>3</sup> RT, min | <sup>4</sup> A, % |
| Aliphatic hydrocarbons |                            |                  |                 |                      |                   |
| Paraffins              |                            |                  |                 |                      |                   |
| CH4                    | Methane                    | 74-82-8          | 16              | 1.72                 | 1.513             |
| C2H6                   | Ethane                     | 74-84-0          | 30              | 2.45                 | 0.020             |
| C6H14                  | n-Hexane                   | 110-54-3         | 86              | 12.02                | 0.009             |
| C7H16                  | n-Heptane                  | 142-82-5         | 100             | 16.07                | 0.008             |
| C8H18                  | n-Octane                   | 111-65-9         | 114             | 20.17                | 0.009             |
| C9H20                  | n-Nonane                   | 111-84-2         | 128             | 24.03                | 0.011             |
| C10H22                 | n-Decane                   | 124-18-5         | 142             | 27.63                | 0.007             |
| C11H24                 | n-Undecane                 | 1120-21-4        | 156             | 30.96                | 0.011             |
| C12H26                 | n-Dodecane                 | 112-40-3         | 170             | 34.09                | 0.006             |
| C13H28                 | n-Tridecane                | 629-50-5         | 184             | 38.09                | 0.013             |
| C13H28                 | 6-Methyldodecane           | 6044-71-9        | 184             | 35.45                | 0.020             |
| C14H30                 | n-Tetradecane              | 629-59-4         | 198             | 44.23                | 0.318             |
| C15H32                 | n-Pentadecane              | 629-62-9         | 212             | 50.77                | 0.036             |
| C16H34                 | 7-Methylpentadecane        | 6165-40-8        | 226             | 53.62                | 0.025             |
| C16H34                 | n-Hexadecane               | 544-76-3         | 226             | 68.59                | 0.030             |
| C17H36                 | 7-Methylhexadecane         | 26730-20-1       | 240             | 75.34                | 0.078             |
| C17H36                 | n-Heptadecane              | 629-78-7         | 240             | 93.19                | 0.040             |
| C18H38                 | 3-Methylheptadecane        | 6418-44-6        | 254             | 114.97               | 0.083             |
| Olefins                |                            |                  |                 |                      |                   |
| C4H8                   | 2-Methyl-1-propene         | 115-11-7         | 56              | 5.93                 | 0.500             |
| C4H8                   | 2-Butene                   | 107-01-7         | 56              | 6.15                 | 0.371             |
| C5H10                  | 2-Methyl-2-butene          | 513-35-9         | 70              | 8.31                 | 0.002             |
| C5H8                   | 1,3-Pentadiene             | 1574-41-0        | 68              | 8.54                 | 0.091             |
| C5H8                   | (E)-1,3-Pentadiene         | 2004-70-8        | 68              | 8.66                 | 0.010             |
| C5H8                   | (Z)-1,3-Pentadiene         | 1574-41-0        | 68              | 8.96                 | <0.001            |
| C6H12                  | 1-Hexene                   | 592-41-6         | 84              | 11.69                | 0.004             |
| C6H12                  | 2,3-Dimethyl-2-butene      | 563-79-1         | 84              | 13.57                | 0.002             |
| C7H14                  | 1-Heptene                  | 592-76-7         | 98              | 15.70                | 0.004             |
| C8H16                  | 3-Ethyl-2-methyl-2-pentene | 19780-67-7       | 112             | 19.38                | 0.006             |
| C8H16                  | 2,3-Dimethyl-2-hexene      | 7145-20-2        | 112             | 19.52                | 0.014             |
| C8H16                  | 1-Octene                   | 111-66-0         | 112             | 19.82                | 0.028             |
| C8H16                  | (Z)-3-Octene               | 14850-22-7       | 112             | 19.93                | 0.022             |
| C8H16                  | (E)-2-Octene               | 13389-42-9       | 112             | 20.03                | 0.010             |
| C8H16                  | (Z)-2-Octene               | 7642-04-8        | 112             | 20.28                | 0.006             |
| C9H18                  | 1-Nonene                   | 124-11-8         | 126             | 23.70                | 0.004             |
| C10H20                 | 1-Decene                   | 872-05-9         | 140             | 27.36                | 0.003             |
| C11H22                 | 1-Undecene                 | 821-95-4         | 154             | 30.74                | 0.001             |

|                                                   |                              |            |     |       |        |
|---------------------------------------------------|------------------------------|------------|-----|-------|--------|
| C <sub>12</sub> H <sub>24</sub>                   | 1-Dodecene                   | 112-41-4   | 168 | 33.96 | 0.002  |
| C <sub>13</sub> H <sub>26</sub>                   | 1-Tridecene                  | 2437-56-1  | 182 | 37.79 | 0.001  |
| <b>Cyclic hydrocarbons</b>                        |                              |            |     |       |        |
| <i>Cycloalkanes (naphthenes) and cycloalkenes</i> |                              |            |     |       |        |
| C <sub>5</sub> H <sub>10</sub>                    | Cyclopentane                 | 287-92-3   | 70  | 8.68  | 0.051  |
| C <sub>6</sub> H <sub>12</sub>                    | Cyclohexane                  | 110-82-7   | 84  | 15.74 | 0.006  |
| <i>Arenes</i>                                     |                              |            |     |       |        |
| C <sub>6</sub> H <sub>6</sub>                     | Benzene                      | 71-43-2    | 78  | 12.59 | 0.046  |
| C <sub>7</sub> H <sub>8</sub>                     | Toluene                      | 108-88-3   | 92  | 17.04 | 0.025  |
| C <sub>7</sub> H <sub>7</sub> F                   | (Fluoromethyl)benzene        | 350-50-5   | 110 | 20.72 | 0.001  |
| C <sub>8</sub> H <sub>10</sub>                    | Ethylbenzene                 | 100-41-4   | 106 | 21.08 | 0.013  |
| C <sub>8</sub> H <sub>10</sub>                    | p-Xylene                     | 106-42-3   | 106 | 21.35 | 0.050  |
| C <sub>8</sub> H <sub>10</sub>                    | o-Xylene                     | 95-47-6    | 106 | 21.55 | 0.006  |
| C <sub>8</sub> H <sub>8</sub>                     | Styrene                      | 100-42-5   | 104 | 22.00 | 0.001  |
| C <sub>8</sub> H <sub>10</sub>                    | m-Xylene                     | 108-38-3   | 106 | 22.02 | 0.010  |
| C <sub>9</sub> H <sub>12</sub>                    | Propylbenzene                | 103-65-1   | 120 | 24.91 | 0.029  |
| C <sub>9</sub> H <sub>12</sub>                    | 1-Ethyl-3-methylbenzene      | 620-14-4   | 120 | 25.11 | 0.003  |
| C <sub>9</sub> H <sub>12</sub>                    | 1-Ethyl-4-methylbenzene      | 622-96-8   | 120 | 25.90 | 0.015  |
| C <sub>9</sub> H <sub>12</sub>                    | 1-Ethyl-2-methylbenzene      | 611-14-3   | 120 | 26.69 | 0.020  |
| C <sub>10</sub> H <sub>14</sub>                   | o-Cymene                     | 527-84-4   | 134 | 27.74 | 0.002  |
| C <sub>10</sub> H <sub>14</sub>                   | Butylbenzene                 | 104-51-8   | 134 | 28.68 | 0.048  |
| C <sub>11</sub> H <sub>16</sub>                   | Pentylbenzene                | 538-68-1   | 148 | 32.09 | 0.045  |
| C <sub>12</sub> H <sub>18</sub>                   | Hexylbenzene                 | 1077-16-3  | 162 | 35.52 | 0.023  |
| C <sub>13</sub> H <sub>20</sub>                   | Heptylbenzene                | 1078-71-3  | 176 | 40.40 | 0.011  |
| C <sub>14</sub> H <sub>22</sub>                   | Octylbenzene                 | 2189-60-8  | 190 | 47.93 | 0.015  |
| C <sub>15</sub> H <sub>24</sub>                   | Nonylbenzene                 | 1081-77-2  | 204 | 59.65 | 0.014  |
| <i>Polycyclic aromatic hydrocarbons (PAH)</i>     |                              |            |     |       |        |
| C <sub>10</sub> H <sub>8</sub>                    | Naphthalene                  | 91-20-3    | 128 | 32.24 | 0.004  |
| C <sub>11</sub> H <sub>10</sub>                   | 1-Methylnaphthalene          | 90-12-0    | 142 | 36.09 | 0.003  |
| C <sub>11</sub> H <sub>10</sub>                   | 2-Methylnaphthalene          | 91-57-6    | 142 | 36.59 | 0.003  |
| <b>Oxygenated hydrocarbons</b>                    |                              |            |     |       |        |
| <i>Alcohols</i>                                   |                              |            |     |       |        |
| CH <sub>4</sub> O                                 | Methanol                     | 67-56-1    | 32  | 4.90  | 0.136  |
| C <sub>2</sub> H <sub>6</sub> O                   | Ethanol                      | 64-17-5    | 46  | 6.48  | 0.006  |
| C <sub>3</sub> H <sub>8</sub> O                   | Isopropyl Alcohol            | 67-63-0    | 60  | 8.06  | 0.001  |
| C <sub>3</sub> H <sub>8</sub> O                   | 1-Propanol                   | 71-23-8    | 60  | 9.11  | 0.002  |
| C <sub>4</sub> H <sub>10</sub> O                  | 1-Butanol                    | 71-36-3    | 74  | 12.86 | 0.085  |
| C <sub>6</sub> H <sub>6</sub> O                   | Phenol                       | 108-95-2   | 94  | 24.75 | 0.003  |
| C <sub>8</sub> H <sub>16</sub> O                  | 4-Ethylcyclohexanol          | 4534-74-1  | 128 | 28.03 | 0.002  |
| <i>Ethers and esters</i>                          |                              |            |     |       |        |
| C <sub>5</sub> H <sub>8</sub> O <sub>2</sub>      | Methyl methacrylate          | 80-62-6    | 100 | 14.49 | <0.001 |
| C <sub>6</sub> H <sub>12</sub> O                  | Tetrahydro-3-methyl-2H-pyran | 26093-63-0 | 100 | 17.67 | 0.002  |
| C <sub>8</sub> H <sub>14</sub> O <sub>2</sub>     | γ-Octalactone                | 104-50-7   | 142 | 34.55 | 0.001  |

|                                                |                                   |            |     |       |        |
|------------------------------------------------|-----------------------------------|------------|-----|-------|--------|
| C <sub>9</sub> H <sub>16</sub> O <sub>2</sub>  | γ-Nonalactone                     | 104-61-0   | 156 | 38.34 | 0.001  |
| C <sub>13</sub> H <sub>26</sub> O <sub>2</sub> | 1-Methylethyl ester decanoic acid | 2311-59-3  | 214 | 44.71 | 0.283  |
| <i>Aldehydes</i>                               |                                   |            |     |       |        |
| C <sub>2</sub> H <sub>4</sub> O                | Acetaldehyde                      | 75-07-0    | 44  | 5.26  | 0.121  |
| C <sub>3</sub> H <sub>4</sub> O                | 2-Propenal                        | 107-02-8   | 56  | 7.29  | 0.003  |
| C <sub>3</sub> H <sub>6</sub> O                | n-Propanal                        | 123-38-6   | 58  | 7.46  | 0.018  |
| C <sub>4</sub> H <sub>6</sub> O                | 2-Methyl-2-propenal               | 78-85-3    | 70  | 9.74  | 0.014  |
| C <sub>4</sub> H <sub>8</sub> O                | 2-Methyl-propanal                 | 78-84-2    | 72  | 9.76  | 0.002  |
| C <sub>4</sub> H <sub>8</sub> O                | n-Butanal                         | 123-72-8   | 72  | 10.54 | 0.025  |
| C <sub>5</sub> H <sub>8</sub> O                | (E)-2-Methyl-2-butenal            | 497-03-0   | 84  | 13.42 | 0.007  |
| C <sub>5</sub> H <sub>10</sub> O               | 3-Methylbutanal                   | 590-86-3   | 86  | 13.67 | 0.055  |
| C <sub>5</sub> H <sub>10</sub> O               | n-Pentanal                        | 110-62-3   | 86  | 14.69 | 0.005  |
| C <sub>5</sub> H <sub>4</sub> O <sub>2</sub>   | Furfural                          | 98-01-1    | 96  | 17.45 | <0.001 |
| C <sub>6</sub> H <sub>10</sub> O               | 2-Methyl-2-pentenal               | 623-36-9   | 98  | 18.12 | 0.001  |
| C <sub>5</sub> H <sub>4</sub> O <sub>2</sub>   | 3-Furaldehyde                     | 498-60-2   | 96  | 18.32 | 0.002  |
| C <sub>6</sub> H <sub>12</sub> O               | n-Hexanal                         | 66-25-1    | 100 | 19.00 | 0.035  |
| C <sub>7</sub> H <sub>14</sub> O               | n-Heptanal                        | 111-71-7   | 114 | 23.26 | 0.005  |
| C <sub>6</sub> H <sub>6</sub> O <sub>2</sub>   | 5-Methyl-2-furancarboxaldehyde    | 620-02-0   | 110 | 23.38 | <0.001 |
| C <sub>7</sub> H <sub>6</sub> O                | Benzaldehyde                      | 100-52-7   | 106 | 24.11 | 0.008  |
| C <sub>8</sub> H <sub>16</sub> O               | 2-Ethylhexanal                    | 123-05-7   | 128 | 25.60 | 0.007  |
| C <sub>8</sub> H <sub>16</sub> O               | n-Octanal                         | 124-13-0   | 128 | 26.96 | 0.005  |
| C <sub>9</sub> H <sub>18</sub> O               | n-Nonanal                         | 124-19-6   | 142 | 30.46 | 0.005  |
| C <sub>10</sub> H <sub>20</sub> O              | n-Decanal                         | 112-31-2   | 156 | 33.71 | 0.006  |
| C <sub>11</sub> H <sub>22</sub> O              | n-Undecanal                       | 112-44-7   | 170 | 37.65 | 0.003  |
| C <sub>12</sub> H <sub>24</sub> O              | n-Dodecanal                       | 112-54-9   | 184 | 43.53 | <0.001 |
| <i>Ketones</i>                                 |                                   |            |     |       |        |
| C <sub>3</sub> H <sub>6</sub> O                | 2-Propanone                       | 67-64-1    | 58  | 7.63  | 0.022  |
| C <sub>4</sub> H <sub>6</sub> O <sub>2</sub>   | 2,3-Butanedione                   | 431-03-8   | 86  | 10.63 | <0.001 |
| C <sub>4</sub> H <sub>8</sub> O                | 2-Butanone                        | 78-93-3    | 72  | 10.71 | 0.004  |
| C <sub>5</sub> H <sub>10</sub> O               | 2-Pentanone                       | 107-87-9   | 86  | 14.45 | <0.001 |
| C <sub>6</sub> H <sub>12</sub> O               | 2-Hexanone                        | 591-78-6   | 100 | 18.75 | 0.002  |
| C <sub>7</sub> H <sub>14</sub> O               | 2-Heptanone                       | 110-43-0   | 114 | 22.85 | 0.005  |
| C <sub>9</sub> H <sub>18</sub> O               | 2-Nonanone                        | 821-55-6   | 142 | 30.14 | 0.002  |
| C <sub>10</sub> H <sub>20</sub> O              | 2-Decanone                        | 693-54-9   | 156 | 33.36 | 0.004  |
| C <sub>8</sub> H <sub>4</sub> O <sub>3</sub>   | 1,3-Isobenzofurandione            | 85-44-9    | 148 | 35.97 | 0.014  |
| C <sub>11</sub> H <sub>22</sub> O              | 2-Undecanone                      | 53452-70-3 | 170 | 37.09 | 0.005  |
| C <sub>15</sub> H <sub>30</sub> O              | 2-Pentadecanone                   | 2345-28-0  | 226 | 87.49 | 0.022  |
| <i>Carboxylic acids</i>                        |                                   |            |     |       |        |
| C <sub>2</sub> H <sub>4</sub> O <sub>2</sub>   | Acetic acid                       | 64-19-7    | 60  | 11.44 | 0.027  |
| C <sub>3</sub> H <sub>6</sub> O <sub>2</sub>   | n-Propanoic acid                  | 79-09-4    | 74  | 15.49 | 0.001  |
| C <sub>4</sub> H <sub>8</sub> O <sub>2</sub>   | n-Butanoic acid                   | 107-92-6   | 88  | 19.13 | 0.010  |
| C <sub>5</sub> H <sub>10</sub> O <sub>2</sub>  | 3-Methylbutanoic acid             | 503-74-2   | 102 | 22.10 | 0.003  |
| C <sub>5</sub> H <sub>10</sub> O <sub>2</sub>  | n-Pentanoic acid                  | 109-52-4   | 102 | 23.06 | 0.002  |

|                                                |                                 |           |     |        |        |
|------------------------------------------------|---------------------------------|-----------|-----|--------|--------|
| C <sub>6</sub> H <sub>12</sub> O <sub>2</sub>  | n-Hexanoic acid                 | 142-62-1  | 116 | 26.54  | 0.025  |
| C <sub>7</sub> H <sub>14</sub> O <sub>2</sub>  | n-Heptanoic acid                | 111-14-8  | 130 | 30.01  | 0.004  |
| C <sub>8</sub> H <sub>16</sub> O <sub>2</sub>  | n-Octanoic acid                 | 124-07-2  | 144 | 32.96  | 0.120  |
| C <sub>9</sub> H <sub>18</sub> O <sub>2</sub>  | n-Nonanoic acid                 | 112-05-0  | 158 | 36.60  | 0.009  |
| C <sub>10</sub> H <sub>20</sub> O <sub>2</sub> | n-Decanoic acid                 | 334-48-5  | 172 | 41.73  | 0.078  |
| C <sub>12</sub> H <sub>24</sub> O <sub>2</sub> | n-Dodecanoic acid               | 143-07-7  | 200 | 62.12  | 0.312  |
| C <sub>14</sub> H <sub>28</sub> O <sub>2</sub> | n-Tetradecanoic acid            | 544-63-8  | 228 | 117.63 | 0.087  |
| <b>Heterocyclic compounds</b>                  |                                 |           |     |        |        |
| <i>Furans</i>                                  |                                 |           |     |        |        |
| C <sub>5</sub> H <sub>6</sub> O                | 2-Methylfuran                   | 534-22-5  | 82  | 10.31  | 0.001  |
| C <sub>5</sub> H <sub>6</sub> O                | 3-Methylfuran                   | 930-27-8  | 82  | 10.59  | <0.001 |
| C <sub>6</sub> H <sub>8</sub> O                | 2-Ethylfuran                    | 3208-16-0 | 96  | 14.57  | <0.001 |
| C <sub>9</sub> H <sub>14</sub> O               | 2-Pentylfuran                   | 3777-69-3 | 138 | 26.10  | 0.001  |
| <b>Nitrogenated compounds</b>                  |                                 |           |     |        |        |
| N <sub>2</sub>                                 | Nitrogen                        | 7727-37-9 | 28  | 1.62   | 0.367  |
| C <sub>2</sub> H <sub>3</sub> N                | Acetonitrile                    | 75-05-8   | 41  | 6.88   | 0.007  |
| C <sub>4</sub> H <sub>5</sub> NO <sub>2</sub>  | Succinimide                     | 123-56-8  | 99  | 28.86  | 0.002  |
| <b>Sulfonated compounds</b>                    |                                 |           |     |        |        |
| H <sub>2</sub> S                               | Hydrogen sulfide                | 7783-06-4 | 34  | 2.90   | 0.005  |
| COS                                            | Carbonyl sulfide                | 463-58-1  | 60  | 3.45   | 0.011  |
| O <sub>2</sub> S                               | Sulfur dioxide                  | 7446-09-5 | 64  | 4.46   | 2.371  |
| CS <sub>2</sub>                                | Carbon disulfide                | 75-15-0   | 76  | 7.76   | 0.048  |
| C <sub>4</sub> H <sub>4</sub> S                | Thiophene                       | 110-02-1  | 84  | 12.32  | 0.021  |
| C <sub>2</sub> H <sub>6</sub> S <sub>2</sub>   | Dimethyl disulfide              | 624-92-0  | 94  | 15.37  | <0.001 |
| C <sub>5</sub> H <sub>6</sub> S                | 2-Methylthiophene               | 554-14-3  | 98  | 16.54  | 0.007  |
| C <sub>5</sub> H <sub>6</sub> S                | 3-Methylthiophene               | 616-44-4  | 98  | 16.89  | 0.117  |
| C <sub>8</sub> H <sub>12</sub> S               | 2-(1,1-Dimethylethyl)-thiophene | 1689-78-7 | 140 | 27.13  | 0.001  |
| C <sub>8</sub> H <sub>12</sub> S               | 3-(1,1-Dimethylethyl)-thiophene | 1689-79-8 | 140 | 28.24  | 0.004  |
| <b>Inorganic compounds</b>                     |                                 |           |     |        |        |
| <i>Oxides</i>                                  |                                 |           |     |        |        |
| CO <sub>2</sub>                                | Carbon dioxide                  | 124-38-9  | 44  | 1.93   | 1.529  |
| H <sub>2</sub> O                               | Water                           | 7732-18-5 | 18  | 3.21   | 90.140 |
| <i>Noble gases</i>                             |                                 |           |     |        |        |
| Ar                                             | Argon                           | 7440-37-1 | 40  | 1.58   | 0.001  |

Note: <sup>1</sup>CAS – unique numerical identifier of chemical compounds included in the register Chemical Abstracts Service (<https://www.cas.org>); <sup>2</sup>MW – nominal mass; <sup>3</sup>RT – retention time; <sup>4</sup>A – normalized area (the area ratio of the individual gas mixture components to the sum of the areas of all the components in the chromatogram).
