# Supplementary material
Source: MDPI journal article supplement (https://www.mdpi.com/2075-163X/11/10/1090)
Supplement: s1 [file s1]

Table S2. Results of GC–MS analysis of volatiles extracted by mechanical shock crushing from quartz (Blagodatnoye deposit, Yenisei ridge).

| Formula                | Name                | <sup>1</sup> CAS/(NIST) | <sup>2</sup> MW | Quartz 7/96.0           |                   |
|------------------------|---------------------|-------------------------|-----------------|-------------------------|-------------------|
|                        |                     |                         |                 | <sup>3</sup> RT,<br>min | <sup>4</sup> A, % |
| Aliphatic hydrocarbons |                     |                         |                 |                         |                   |
| Paraffins              |                     |                         |                 |                         |                   |
| CH4                    | Methane             | 74-82-8                 | 16              | 1.72                    | 6.086             |
| C2H6                   | Ethane              | 74-84-0                 | 30              | 2.47                    | 0.082             |
| C3H8                   | n-Propane           | 74-98-6                 | 44              | 4.23                    | 0.019             |
| C4H10                  | Isobutane           | 75-28-5                 | 58              | 5.76                    | 0.015             |
| C4H10                  | n-Butane            | 106-97-8                | 58              | 6.16                    | 0.018             |
| C5H12                  | n-Pentane           | 109-66-0                | 72              | 8.63                    | 0.003             |
| C6H14                  | n-Hexane            | 110-54-3                | 86              | 12.07                   | 0.013             |
| C7H16                  | n-Heptane           | 142-82-5                | 100             | 16.12                   | 0.007             |
| C8H16                  | 3-Methyleneheptane  | 1632-16-2               | 112             | 19.60                   | 0.003             |
| C8H18                  | n-Octane            | 111-65-9                | 114             | 20.22                   | 0.008             |
| C9H20                  | n-Nonane            | 111-84-2                | 128             | 24.10                   | 0.010             |
| C10H22                 | n-Decane            | 124-18-5                | 142             | 27.69                   | 0.012             |
| C11H24                 | n-Undecane          | 1120-21-4               | 156             | 31.01                   | 0.009             |
| C12H26                 | n-Dodecane          | 112-40-3                | 170             | 34.15                   | 0.007             |
| C13H28                 | 6-Methyldodecane    | 6044-71-9               | 184             | 35.14                   | 0.014             |
| C13H28                 | n-Tridecane         | 629-50-5                | 184             | 38.15                   | 0.009             |
| C14H30                 | n-Tetradecane       | 629-59-4                | 198             | 44.98                   | 0.023             |
| C15H32                 | n-Pentadecane       | 629-62-9                | 212             | 54.22                   | 0.067             |
| C16H34                 | 5,8-Diethyldodecane | 24251-86-3              | 226             | 60.55                   | 0.021             |
| C16H34                 | n-Hexadecane        | 544-76-3                | 226             | 68.96                   | 0.021             |
| C18H38                 | 3-Methylheptadecane | 6418-44-6               | 254             | 112.52                  | 1.035             |
| Olefins                |                     |                         |                 |                         |                   |
| C2H4                   | Ethylene            | 74-85-1                 | 28              | 2.23                    | 0.004             |
| C4H8                   | 2-Methyl-1-propene  | 115-11-7                | 56              | 5.96                    | 0.008             |
| C4H8                   | 2-Butene            | 107-01-7                | 56              | 6.28                    | <0.001            |
| C5H10                  | 2-methyl-2-butene   | 513-35-9                | 70              | 8.19                    | 0.003             |
| C5H10                  | 1-Pentene           | 109-67-1                | 70              | 8.33                    | 0.001             |
| C5H8                   | 1,3-Pentadiene      | 1574-41-0               | 68              | 8.58                    | 0.003             |
| C5H8                   | (E)-1,3-Pentadiene  | 2004-70-8               | 68              | 8.68                    | <0.001            |
| C5H8                   | (Z)-1,3-Pentadiene  | 1574-41-0               | 68              | 8.81                    | <0.001            |
| C6H12                  | 1-Hexene            | 592-41-6                | 84              | 11.72                   | 0.008             |
| C7H14                  | 1-Heptene           | 592-76-7                | 98              | 15.77                   | 0.004             |
| C8H16                  | 1-Octene            | 111-66-0                | 112             | 19.88                   | 0.002             |
| C9H18                  | 1-Nonene            | 124-11-8                | 126             | 23.81                   | 0.002             |
| C10H20                 | 1-Decene            | 872-05-9                | 140             | 27.44                   | 0.003             |
| C11H22                 | 1-Undecene          | 821-95-4                | 154             | 30.51                   | 0.005             |
| C12H24                 | 1-Dodecene          | 112-41-4                | 168             | 33.94                   | 0.005             |
| C13H26                 | 1-Tridecene         | 2437-56-1               | 182             | 37.90                   | 0.006             |

|                                                   |                                   |            |     |       |        |
|---------------------------------------------------|-----------------------------------|------------|-----|-------|--------|
| C <sub>14</sub> H <sub>28</sub>                   | 1-Tetradecene                     | 1120-36-1  | 196 | 44.36 | 0.022  |
| C <sub>15</sub> H <sub>30</sub>                   | 1-Pentadecene                     | 13360-61-7 | 210 | 53.14 | 0.021  |
| C <sub>16</sub> H <sub>32</sub>                   | 1-Hexadecene                      | 629-73-2   | 224 | 67.59 | 0.026  |
| <b>Cyclic hydrocarbons</b>                        |                                   |            |     |       |        |
| <i>Cycloalkanes (naphthenes) and cycloalkenes</i> |                                   |            |     |       |        |
| C <sub>6</sub> H <sub>10</sub>                    | 1-Methylcyclopentene              | 693-89-0   | 82  | 12.86 | 0.001  |
| <i>Arenes</i>                                     |                                   |            |     |       |        |
| C <sub>6</sub> H <sub>6</sub>                     | Benzene                           | 71-43-2    | 78  | 12.71 | 0.011  |
| C <sub>7</sub> H <sub>8</sub>                     | Toluene                           | 108-88-3   | 92  | 17.09 | 0.006  |
| C <sub>7</sub> H <sub>7</sub> F                   | (Fluoromethyl)benzene             | 350-50-5   | 110 | 20.73 | <0.001 |
| C <sub>8</sub> H <sub>10</sub>                    | Ethylbenzene                      | 100-41-4   | 106 | 21.13 | 0.002  |
| C <sub>8</sub> H <sub>10</sub>                    | p-Xylene                          | 106-42-3   | 106 | 21.40 | 0.005  |
| C <sub>8</sub> H <sub>10</sub>                    | o-Xylene                          | 95-47-6    | 106 | 21.70 | 0.001  |
| C <sub>8</sub> H <sub>10</sub>                    | m-Xylene                          | 108-38-3   | 106 | 22.03 | 0.001  |
| C <sub>8</sub> H <sub>8</sub>                     | Styrene                           | 100-42-5   | 104 | 22.05 | 0.016  |
| C <sub>9</sub> H <sub>12</sub>                    | Propylbenzene                     | 103-65-1   | 120 | 24.96 | 0.005  |
| C <sub>10</sub> H <sub>14</sub>                   | Butylbenzene                      | 104-51-8   | 134 | 28.73 | 0.011  |
| C <sub>11</sub> H <sub>16</sub>                   | Pentylbenzene                     | 538-68-1   | 148 | 32.12 | 0.013  |
| C <sub>12</sub> H <sub>18</sub>                   | Hexylbenzene                      | 1077-16-3  | 162 | 35.57 | 0.007  |
| C <sub>13</sub> H <sub>20</sub>                   | Heptylbenzene                     | 1078-71-3  | 176 | 40.47 | 0.006  |
| <b>Oxygenated hydrocarbons</b>                    |                                   |            |     |       |        |
| <i>Alcohols</i>                                   |                                   |            |     |       |        |
| CH <sub>4</sub> O                                 | Methanol                          | 67-56-1    | 32  | 4.93  | 0.010  |
| C <sub>2</sub> H <sub>6</sub> O                   | Ethanol                           | 64-17-5    | 46  | 6.51  | 0.001  |
| C <sub>3</sub> H <sub>8</sub> O                   | Isopropyl Alcohol                 | 67-63-0    | 60  | 8.08  | 0.001  |
| C <sub>3</sub> H <sub>8</sub> O                   | 1-Propanol                        | 71-23-8    | 60  | 9.13  | 0.001  |
| C <sub>4</sub> H <sub>10</sub> O                  | 1-Butanol                         | 71-36-3    | 74  | 12.97 | 0.015  |
| C <sub>6</sub> H <sub>6</sub> O                   | Phenol                            | 108-95-2   | 94  | 24.80 | 0.004  |
| <i>Ethers and esters</i>                          |                                   |            |     |       |        |
| C <sub>5</sub> H <sub>8</sub> O <sub>2</sub>      | Methyl methacrylate               | 80-62-6    | 100 | 14.49 | 0.002  |
| C <sub>4</sub> H <sub>6</sub> O <sub>2</sub>      | Butyrolactone                     | 96-48-0    | 86  | 20.98 | 0.002  |
| C <sub>8</sub> H <sub>14</sub> O <sub>2</sub>     | γ-Octalactone                     | 104-50-7   | 142 | 34.60 | 0.004  |
| C <sub>9</sub> H <sub>16</sub> O <sub>2</sub>     | γ-Nonalactone                     | 104-61-0   | 156 | 39.15 | 0.003  |
| C <sub>10</sub> H <sub>18</sub> O <sub>2</sub>    | γ-Decalactone                     | 706-14-9   | 170 | 46.09 | 0.005  |
| C <sub>13</sub> H <sub>18</sub> O <sub>2</sub>    | Benzoic acid n-hexyl ester        | 6789-88-4  | 206 | 56.02 | 0.009  |
| C <sub>14</sub> H <sub>20</sub> O <sub>2</sub>    | Benzoic acid hept-2-yl ester      | (368694)   | 220 | 58.88 | 0.007  |
| C <sub>14</sub> H <sub>20</sub> O <sub>2</sub>    | Benzoic acid hept-3-yl ester      | (368767)   | 220 | 63.50 | 0.015  |
| C <sub>13</sub> H <sub>16</sub> O <sub>2</sub>    | Benzoic acid cyclohexyl ester     | 2412-73-9  | 204 | 70.99 | 0.033  |
| C <sub>12</sub> H <sub>22</sub> O <sub>2</sub>    | γ-Dodecalactone                   | 2305-05-7  | 198 | 74.22 | 0.155  |
| C <sub>14</sub> H <sub>20</sub> O <sub>2</sub>    | Benzoic acid heptyl ester         | 7155-12-6  | 220 | 78.08 | 0.030  |
| C <sub>14</sub> H <sub>20</sub> O <sub>2</sub>    | Butyl ester 4-propyl-benzoic acid | (439058)   | 220 | 88.01 | 0.014  |

|                                                |                                |            |     |       |        |
|------------------------------------------------|--------------------------------|------------|-----|-------|--------|
| C <sub>14</sub> H <sub>18</sub> O <sub>4</sub> | Dipropyl phthalate             | 131-16-8   | 250 | 98.67 | 0.295  |
| <i>Aldehydes</i>                               |                                |            |     |       |        |
| C <sub>2</sub> H <sub>4</sub> O                | Acetaldehyde                   | 75-07-0    | 44  | 5.28  | 0.041  |
| C <sub>3</sub> H <sub>4</sub> O                | 2-Propenal                     | 107-02-8   | 56  | 7.29  | 0.004  |
| C <sub>3</sub> H <sub>6</sub> O                | n-Propanal                     | 123-38-6   | 58  | 7.46  | 0.008  |
| C <sub>4</sub> H <sub>6</sub> O                | 2-Methyl-2-propenal            | 78-85-3    | 70  | 9.76  | 0.005  |
| C <sub>4</sub> H <sub>8</sub> O                | 2-Methyl-propanal              | 78-84-2    | 72  | 9.79  | 0.007  |
| C <sub>4</sub> H <sub>8</sub> O                | n-Butanal                      | 123-72-8   | 72  | 10.54 | 0.005  |
| C <sub>5</sub> H <sub>8</sub> O                | 2-Methyl-2-butenal             | 1115-11-3  | 84  | 13.47 | 0.001  |
| C <sub>5</sub> H <sub>10</sub> O               | 3-methyl-butanal               | 590-86-3   | 86  | 13.77 | 0.003  |
| C <sub>5</sub> H <sub>10</sub> O               | n-Pentanal                     | 110-62-3   | 86  | 14.72 | 0.003  |
| C <sub>5</sub> H <sub>4</sub> O <sub>2</sub>   | Furfural                       | 98-01-1    | 96  | 17.50 | 0.005  |
| C <sub>6</sub> H <sub>10</sub> O               | 2-Methyl-2-pentenal            | 623-36-9   | 98  | 18.15 | <0.001 |
| C <sub>5</sub> H <sub>4</sub> O <sub>2</sub>   | 3-Furaldehyde                  | 498-60-2   | 96  | 18.37 | 0.003  |
| C <sub>6</sub> H <sub>12</sub> O               | n-Hexanal                      | 66-25-1    | 100 | 19.07 | 0.013  |
| C <sub>7</sub> H <sub>14</sub> O               | n-Heptanal                     | 111-71-7   | 114 | 23.20 | 0.008  |
| C <sub>6</sub> H <sub>6</sub> O <sub>2</sub>   | 5-Methyl-2-furancarboxaldehyde | 620-02-0   | 110 | 23.41 | 0.001  |
| C <sub>7</sub> H <sub>6</sub> O                | Benzaldehyde                   | 100-52-7   | 106 | 24.16 | 0.018  |
| C <sub>8</sub> H <sub>16</sub> O               | 2-Ethylhexanal                 | 123-05-7   | 128 | 25.66 | 0.005  |
| C <sub>8</sub> H <sub>16</sub> O               | n-Octanal                      | 124-13-0   | 128 | 27.01 | 0.014  |
| C <sub>9</sub> H <sub>18</sub> O               | n-Nonanal                      | 124-19-6   | 142 | 30.51 | 0.025  |
| C <sub>10</sub> H <sub>20</sub> O              | n-Decanal                      | 112-31-2   | 156 | 33.74 | 0.023  |
| C <sub>11</sub> H <sub>22</sub> O              | n-Undecanal                    | 112-44-7   | 170 | 37.70 | 0.009  |
| C <sub>12</sub> H <sub>24</sub> O              | n-Dodecanal                    | 112-54-9   | 184 | 43.83 | 0.012  |
| C <sub>14</sub> H <sub>28</sub> O              | n-Tetradecanal                 | 124-25-4   | 212 | 65.56 | 0.048  |
| C <sub>15</sub> H <sub>30</sub> O              | n-Pentadecanal                 | 2765-11-9  | 226 | 91.57 | 0.036  |
| <i>Ketones</i>                                 |                                |            |     |       |        |
| C <sub>3</sub> H <sub>6</sub> O                | 2-Propanone                    | 67-64-1    | 58  | 7.66  | 0.014  |
| C <sub>4</sub> H <sub>6</sub> O <sub>2</sub>   | 2,3-Butanedione                | 431-03-8   | 86  | 10.66 | 0.007  |
| C <sub>4</sub> H <sub>8</sub> O                | 2-Butanone                     | 78-93-3    | 72  | 10.74 | 0.008  |
| C <sub>5</sub> H <sub>8</sub> O                | Cyclopentanone                 | 120-92-3   | 84  | 16.97 | 0.003  |
| C <sub>6</sub> H <sub>12</sub> O               | 2-Hexanone                     | 591-78-6   | 100 | 18.78 | 0.003  |
| C <sub>7</sub> H <sub>14</sub> O               | 2-Heptanone                    | 110-43-0   | 114 | 22.90 | 0.003  |
| C <sub>8</sub> H <sub>16</sub> O               | 2-Octanone                     | 111-13-7   | 128 | 25.90 | 0.003  |
| C <sub>9</sub> H <sub>18</sub> O               | 2-Nonanone                     | 821-55-6   | 142 | 30.19 | 0.003  |
| C <sub>10</sub> H <sub>20</sub> O              | 2-Decanone                     | 693-54-9   | 156 | 33.41 | 0.013  |
| C <sub>8</sub> H <sub>4</sub> O <sub>3</sub>   | 1,3-Isobenzofurandione         | 85-44-9    | 148 | 36.04 | 0.015  |
| C <sub>11</sub> H <sub>22</sub> O              | 2-Undecanone                   | 53452-70-3 | 170 | 37.19 | 0.011  |
| C <sub>12</sub> H <sub>24</sub> O              | 2-Dodecanone                   | 6175-49-1  | 184 | 42.73 | 0.017  |
| C <sub>13</sub> H <sub>26</sub> O              | 2-Tridecanone                  | 593-08-8   | 198 | 51.56 | 0.014  |
| C <sub>15</sub> H <sub>30</sub> O              | 3-Pentadecanone                | 18787-66-1 | 226 | 79.35 | 0.059  |
| C <sub>15</sub> H <sub>30</sub> O              | 2-Pentadecanone                | 2345-28-0  | 226 | 87.86 | 0.033  |
| <i>Carboxylic acids</i>                        |                                |            |     |       |        |
| C <sub>2</sub> H <sub>4</sub> O <sub>2</sub>   | Acetic acid                    | 64-19-7    | 60  | 11.36 | 0.096  |

|                                                |                            |           |     |        |        |
|------------------------------------------------|----------------------------|-----------|-----|--------|--------|
| C <sub>3</sub> H <sub>6</sub> O <sub>2</sub>   | n-Propanoic acid           | 79-09-4   | 74  | 15.45  | 0.003  |
| C <sub>4</sub> H <sub>8</sub> O <sub>2</sub>   | n-Butanoic acid            | 107-92-6  | 88  | 19.00  | 0.047  |
| C <sub>5</sub> H <sub>10</sub> O <sub>2</sub>  | 3-Methylbutanoic acid      | 503-74-2  | 102 | 22.10  | 0.004  |
| C <sub>5</sub> H <sub>10</sub> O <sub>2</sub>  | n-Pentanoic acid           | 109-52-4  | 102 | 23.03  | 0.011  |
| C <sub>6</sub> H <sub>12</sub> O <sub>2</sub>  | n-Hexanoic acid            | 142-62-1  | 116 | 26.53  | 0.054  |
| C <sub>7</sub> H <sub>14</sub> O <sub>2</sub>  | n-Heptanoic acid           | 111-14-8  | 130 | 29.99  | 0.014  |
| C <sub>8</sub> H <sub>16</sub> O <sub>2</sub>  | n-Octanoic acid            | 124-07-2  | 144 | 32.99  | 0.109  |
| C <sub>9</sub> H <sub>18</sub> O <sub>2</sub>  | n-Nonanoic acid            | 112-05-0  | 158 | 36.67  | 0.016  |
| C <sub>10</sub> H <sub>20</sub> O <sub>2</sub> | n-Decanoic acid            | 334-48-5  | 172 | 41.76  | 0.054  |
| C <sub>11</sub> H <sub>22</sub> O <sub>2</sub> | n-Undecanoic acid          | 112-37-8  | 186 | 54.20  | 0.072  |
| C <sub>12</sub> H <sub>24</sub> O <sub>2</sub> | n-Dodecanoic acid          | 143-07-7  | 200 | 62.61  | 0.164  |
| C <sub>13</sub> H <sub>26</sub> O <sub>2</sub> | n-Tridecanoic acid         | 638-53-9  | 214 | 88.96  | 0.011  |
| C <sub>14</sub> H <sub>28</sub> O <sub>2</sub> | 2-Methyltridecanoic acid   | x         | 228 | 110.81 | 0.027  |
| C <sub>14</sub> H <sub>28</sub> O <sub>2</sub> | n-Tetradecanoic acid       | 544-63-8  | 228 | 118.55 | 0.081  |
| <b>Heterocyclic compounds</b>                  |                            |           |     |        |        |
| <i>Furans</i>                                  |                            |           |     |        |        |
| C <sub>5</sub> H <sub>6</sub> O                | 2-Methylfuran              | 534-22-5  | 82  | 10.34  | 0.001  |
| C <sub>6</sub> H <sub>8</sub> O                | 2-Ethylfuran               | 3208-16-0 | 96  | 15.09  | <0.001 |
| C <sub>9</sub> H <sub>14</sub> O               | 2-Pentylfuran              | 3777-69-3 | 138 | 26.16  | 0.004  |
| <b>Nitrogenated compounds</b>                  |                            |           |     |        |        |
| N <sub>2</sub>                                 | Nitrogen                   | 7727-37-9 | 28  | 1.62   | 1.389  |
| CHNO                                           | Hydrogen isocyanate        | 75-13-8   | 43  | 6.46   | 0.017  |
| C <sub>2</sub> H <sub>3</sub> N                | Acetonitrile               | 75-05-8   | 41  | 6.89   | 0.010  |
| C <sub>2</sub> H <sub>5</sub> NO               | Acetamide                  | 60-35-5   | 59  | 16.05  | 0.011  |
| C <sub>4</sub> H <sub>6</sub> N <sub>2</sub>   | 1-Methyl-1H-pyrazole       | 930-36-9  | 82  | 18.28  | 0.002  |
| C <sub>6</sub> H <sub>8</sub> N <sub>2</sub> O | 2-Methoxy-6-methylpyrazine | 2882-21-5 | 124 | 27.81  | 0.003  |
| C <sub>4</sub> H <sub>5</sub> NO <sub>2</sub>  | Succinimide                | 123-56-8  | 99  | 28.89  | 0.004  |
| <b>Sulfonated compounds</b>                    |                            |           |     |        |        |
| H <sub>2</sub> S                               | Hydrogen sulfide           | 7783-06-4 | 34  | 2.86   | 0.001  |
| COS                                            | Carbonyl sulfide           | 463-58-1  | 60  | 3.51   | 0.002  |
| O <sub>2</sub> S                               | Sulfur dioxide             | 7446-09-5 | 64  | 4.65   | 0.068  |
| CH <sub>4</sub> S                              | Methanethiol               | 74-93-1   | 48  | 5.56   | 0.003  |
| CS <sub>2</sub>                                | Carbon disulfide           | 75-15-0   | 76  | 7.88   | 0.003  |
| C <sub>4</sub> H <sub>4</sub> S                | Thiophene                  | 110-02-1  | 84  | 12.36  | <0.001 |
| C <sub>2</sub> H <sub>6</sub> S <sub>2</sub>   | Dimethyl disulfide         | 624-92-0  | 94  | 15.44  | <0.001 |
| C <sub>5</sub> H <sub>6</sub> S                | 2-Methylthiophene          | 554-14-3  | 98  | 16.92  | <0.001 |
| <b>Inorganic compounds</b>                     |                            |           |     |        |        |
| <i>Oxides</i>                                  |                            |           |     |        |        |
| CO <sub>2</sub>                                | Carbon dioxide             | 124-38-9  | 44  | 1.92   | 2.130  |
| H <sub>2</sub> O                               | Water                      | 7732-18-5 | 18  | 3.21   | 86.775 |
| <i>Noble gases</i>                             |                            |           |     |        |        |
| Ar                                             | Argon                      | 7440-37-1 | 40  | 1.62   | 0.008  |
| <i>Other</i>                                   |                            |           |     |        |        |
| C <sub>4</sub> H <sub>7</sub> ClO              | Butanoyl chloride          | 141-75-3  | 106 | 16.35  | 0.003  |

Note: <sup>1</sup>CAS/(NIST) – unique numerical identifier of chemical compounds included in the register Chemical Abstracts Service (<https://www.cas.org>) or NIST number (a unique number given to each spectrum in the NIST archive); <sup>2</sup>MW – nominal mass; <sup>3</sup>RT – retention time; <sup>4</sup>A – normalized area (the area ratio of the individual gas mixture components to the sum of the areas of all the components in the chromatogram).
