# Supplementary material
Source: MDPI journal article supplement (https://www.mdpi.com/2075-163X/11/10/1090)
Supplement: s1 [file s1]

Table S12. Results of GC–MS analysis of volatiles extracted by mechanical shock crushing from quartz (Blagodatnoye deposit, Yenisei ridge).

| Formula                                    | Name                        | <sup>1</sup> CAS/(NIST) | <sup>2</sup> MW | Quartz 111/76.5         |                   |
|--------------------------------------------|-----------------------------|-------------------------|-----------------|-------------------------|-------------------|
|                                            |                             |                         |                 | <sup>3</sup> RT,<br>min | <sup>4</sup> A, % |
| Aliphatic hydrocarbons                     |                             |                         |                 |                         |                   |
| Paraffins                                  |                             |                         |                 |                         |                   |
| CH4                                        | Methane                     | 74-82-8                 | 16              | 1.66                    | 1.552             |
| C2H6                                       | Ethane                      | 74-84-0                 | 30              | 2.31                    | 0.019             |
| C5H12                                      | n-Pentane                   | 109-66-0                | 72              | 7.60                    | 0.141             |
| C6H14                                      | n-Hexane                    | 110-54-3                | 86              | 12.07                   | 0.014             |
| C7H16                                      | n-Heptane                   | 142-82-5                | 100             | 16.19                   | 0.002             |
| C8H18                                      | n-Octane                    | 111-65-9                | 114             | 20.35                   | 0.057             |
| C9H20                                      | n-Nonane                    | 111-84-2                | 128             | 24.26                   | 0.064             |
| C10H22                                     | n-Decane                    | 124-18-5                | 142             | 27.90                   | 0.122             |
| C11H24                                     | n-Undecane                  | 1120-21-4               | 156             | 31.26                   | 0.031             |
| C12H26                                     | n-Dodecane                  | 112-40-3                | 170             | 34.43                   | 0.024             |
| C13H28                                     | n-Tridecane                 | 629-50-5                | 184             | 38.64                   | 0.030             |
| C14H30                                     | n-Tetradecane               | 629-59-4                | 198             | 45.14                   | 0.058             |
| C15H32                                     | n-Pentadecane               | 629-62-9                | 212             | 55.45                   | 0.057             |
| C16H34                                     | n-Hexadecane                | 544-76-3                | 226             | 71.90                   | 0.048             |
| C17H36                                     | n-Heptadecane               | 629-78-7                | 240             | 98.82                   | 0.041             |
| Olefins                                    |                             |                         |                 |                         |                   |
| C2H4                                       | Ethylene                    | 74-85-1                 | 28              | 2.01                    | 0.003             |
| C4H8                                       | 2-Methyl-1-propene          | 115-11-7                | 56              | 5.69                    | 0.024             |
| C4H8                                       | 2-Butene                    | 107-01-7                | 56              | 5.89                    | 0.026             |
| C5H8                                       | 1,3-Pentadiene              | 1574-41-0               | 68              | 8.46                    | 0.051             |
| C5H8                                       | (E)-1,3-Pentadiene          | 2004-70-8               | 68              | 8.66                    | 0.010             |
| C6H12                                      | 1-Hexene                    | 592-41-6                | 84              | 11.69                   | 0.038             |
| C6H10                                      | (E)-2-methyl-1,3-pentadiene | 926-54-5                | 82              | 12.77                   | 0.005             |
| C7H14                                      | 1-Heptene                   | 592-76-7                | 98              | 15.81                   | 0.020             |
| C8H16                                      | 1-Octene                    | 111-66-0                | 112             | 19.97                   | 0.012             |
| C9H18                                      | 1-Nonene                    | 124-11-8                | 126             | 23.96                   | 0.019             |
| C10H20                                     | 1-Decene                    | 872-05-9                | 140             | 27.63                   | 0.021             |
| C11H22                                     | 1-Undecene                  | 821-95-4                | 154             | 31.01                   | 0.019             |
| C12H24                                     | 1-Dodecene                  | 112-41-4                | 168             | 34.18                   | 0.031             |
| C13H26                                     | 1-Tridecene                 | 2437-56-1               | 182             | 38.32                   | 0.033             |
| C14H28                                     | 1-Tetradecene               | 1120-36-1               | 196             | 44.59                   | 0.037             |
| C15H30                                     | 1-Pentadecene               | 13360-61-7              | 210             | 54.68                   | 0.169             |
| C17H34                                     | 1-Heptadecene               | 6765-39-5               | 238             | 96.79                   | 0.035             |
| Cyclic hydrocarbons                        |                             |                         |                 |                         |                   |
| Cycloalkanes (naphthenes) and cycloalkenes |                             |                         |                 |                         |                   |
| C5H10                                      | Cyclopentane                | 287-92-3                | 70              | 8.25                    | 0.022             |
| C10H16                                     | dl-Limonene                 | 138-86-3                | 136             | 28.00                   | 0.016             |
| Arenes                                     |                             |                         |                 |                         |                   |

|                                                |                                                     |           |     |        |       |
|------------------------------------------------|-----------------------------------------------------|-----------|-----|--------|-------|
| C <sub>6</sub> H <sub>6</sub>                  | Benzene                                             | 71-43-2   | 78  | 12.42  | 0.032 |
| C <sub>7</sub> H <sub>8</sub>                  | Toluene                                             | 108-88-3  | 92  | 16.91  | 0.014 |
| C <sub>7</sub> H <sub>7</sub> F                | (Fluoromethyl)benzene                               | 350-50-5  | 110 | 20.78  | 0.001 |
| C <sub>8</sub> H <sub>10</sub>                 | Ethylbenzene                                        | 100-41-4  | 106 | 21.01  | 0.007 |
| C <sub>8</sub> H <sub>10</sub>                 | p-Xylene                                            | 106-42-3  | 106 | 21.30  | 0.022 |
| C <sub>8</sub> H <sub>10</sub>                 | o-Xylene                                            | 95-47-6   | 106 | 21.60  | 0.006 |
| C <sub>8</sub> H <sub>8</sub>                  | Styrene                                             | 100-42-5  | 104 | 21.91  | 0.006 |
| C <sub>8</sub> H <sub>10</sub>                 | m-Xylene                                            | 108-38-3  | 106 | 21.85  | 0.008 |
| C <sub>8</sub> H <sub>9</sub> F                | 3-Fluoro-o-xylene                                   | 443-82-3  | 124 | 22.23  | 0.006 |
| C <sub>8</sub> H <sub>9</sub> F                | 5-Fluoro-m-xylene                                   | 461-97-2  | 124 | 22.64  | 0.001 |
| C <sub>8</sub> H <sub>9</sub> F                | p-Fluoroethylbenzene                                | 459-47-2  | 124 | 22.91  | 0.003 |
| C <sub>9</sub> H <sub>12</sub>                 | Propylbenzene                                       | 103-65-1  | 120 | 24.91  | 0.008 |
| C <sub>10</sub> H <sub>12</sub>                | (2-Methyl-2-propenyl)-benzene                       | 3290-53-7 | 132 | 27.18  | 0.008 |
| C <sub>10</sub> H <sub>14</sub>                | Butylbenzene                                        | 104-51-8  | 134 | 28.73  | 0.021 |
| C <sub>11</sub> H <sub>16</sub>                | Pentylbenzene                                       | 538-68-1  | 148 | 32.17  | 0.026 |
| <b>Oxygenated hydrocarbons</b>                 |                                                     |           |     |        |       |
| <i>Alcohols</i>                                |                                                     |           |     |        |       |
| CH <sub>4</sub> O                              | Methanol                                            | 67-56-1   | 32  | 4.16   | 0.900 |
| C <sub>2</sub> H <sub>6</sub> O                | Ethanol                                             | 64-17-5   | 46  | 6.09   | 0.017 |
| C <sub>3</sub> H <sub>8</sub> O                | Isopropyl Alcohol                                   | 67-63-0   | 60  | 7.81   | 0.008 |
| C <sub>3</sub> H <sub>8</sub> O                | 1-Propanol                                          | 71-23-8   | 60  | 8.81   | 0.007 |
| C <sub>4</sub> H <sub>10</sub> O               | 1-Butanol                                           | 71-36-3   | 74  | 12.57  | 0.013 |
| C <sub>5</sub> H <sub>6</sub> O <sub>2</sub>   | 2-Furanmethanol                                     | 98-00-0   | 98  | 19.00  | 0.003 |
| C <sub>6</sub> H <sub>6</sub> O                | Phenol                                              | 108-95-2  | 94  | 24.46  | 0.045 |
| C <sub>7</sub> H <sub>8</sub> O                | 2-Methylphenol                                      | 95-48-7   | 108 | 25.99  | 0.004 |
| C <sub>7</sub> H <sub>8</sub> O                | 3-Methylphenol                                      | 108-39-4  | 108 | 27.22  | 0.006 |
| C <sub>7</sub> H <sub>8</sub> O                | 4-Methylphenol                                      | 106-44-5  | 108 | 28.06  | 0.013 |
| C <sub>8</sub> H <sub>10</sub> O <sub>2</sub>  | 2-Phenoxyethanol                                    | 122-99-6  | 138 | 32.80  | 0.008 |
| <i>Ethers and esters</i>                       |                                                     |           |     |        |       |
| C <sub>5</sub> H <sub>8</sub> O <sub>2</sub>   | Methyl methacrylate                                 | 80-62-6   | 100 | 14.28  | 0.008 |
| C <sub>5</sub> H <sub>8</sub> O                | 3,4-Dihydro-2H-pyran                                | 110-87-2  | 84  | 16.44  | 0.020 |
| C <sub>4</sub> H <sub>6</sub> O <sub>2</sub>   | Butyrolactone                                       | 96-48-0   | 86  | 20.17  | 0.005 |
| C <sub>6</sub> H <sub>10</sub> O <sub>2</sub>  | γ-Hexalactone                                       | 695-06-7  | 114 | 26.95  | 0.011 |
| C <sub>6</sub> H <sub>10</sub> O <sub>2</sub>  | δ-Hexalactone                                       | 823-22-3  | 114 | 29.63  | 0.054 |
| C <sub>7</sub> H <sub>12</sub> O <sub>2</sub>  | γ-Heptalactone                                      | 105-21-5  | 128 | 30.66  | 0.005 |
| C <sub>11</sub> H <sub>16</sub> O              | 1-(1,1-Dimethylethyl)-4-methoxy-benzene             | 5396-38-3 | 164 | 34.00  | 0.145 |
| C <sub>8</sub> H <sub>14</sub> O <sub>2</sub>  | γ-Octalactone                                       | 104-50-7  | 142 | 34.15  | 0.011 |
| C <sub>9</sub> H <sub>16</sub> O <sub>2</sub>  | γ-Nonalactone                                       | 104-61-0  | 156 | 38.57  | 0.015 |
| C <sub>10</sub> H <sub>18</sub> O <sub>2</sub> | γ-Decalactone                                       | 706-14-9  | 170 | 45.34  | 0.021 |
| C <sub>11</sub> H <sub>20</sub> O <sub>2</sub> | γ-Undecalactone                                     | 104-67-6  | 184 | 55.98  | 0.004 |
| C <sub>12</sub> H <sub>22</sub> O <sub>2</sub> | γ-Dodecalactone                                     | 2305-05-7 | 198 | 73.30  | 0.024 |
| C <sub>15</sub> H <sub>28</sub> O <sub>4</sub> | 3-Methylbut-2-yl 3-methylpentyl ester succinic acid | (390641)  | 272 | 101.21 | 0.021 |

|                                              |                                 |            |     |       |       |
|----------------------------------------------|---------------------------------|------------|-----|-------|-------|
| <i>Aldehydes</i>                             |                                 |            |     |       |       |
| C <sub>2</sub> H <sub>4</sub> O              | Acetaldehyde                    | 75-07-0    | 44  | 4.94  | 0.049 |
| C <sub>3</sub> H <sub>4</sub> O              | 2-Propenal                      | 107-02-8   | 56  | 7.00  | 0.017 |
| C <sub>3</sub> H <sub>6</sub> O              | n-Propanal                      | 123-38-6   | 58  | 7.25  | 0.031 |
| C <sub>4</sub> H <sub>6</sub> O              | 2-Methyl-2-propenal             | 78-85-3    | 70  | 9.41  | 0.022 |
| C <sub>4</sub> H <sub>8</sub> O              | 2-Methylpropanal                | 78-84-2    | 72  | 9.49  | 0.012 |
| C <sub>4</sub> H <sub>8</sub> O              | n-Butanal                       | 123-72-8   | 72  | 10.24 | 0.006 |
| C <sub>5</sub> H <sub>10</sub> O             | 3-Methylbutanal                 | 590-86-3   | 86  | 13.43 | 0.035 |
| C <sub>5</sub> H <sub>10</sub> O             | n-Pentanal                      | 110-62-3   | 86  | 14.41 | 0.024 |
| C <sub>5</sub> H <sub>4</sub> O <sub>2</sub> | Furfural                        | 98-01-1    | 96  | 16.99 | 0.002 |
| C <sub>5</sub> H <sub>4</sub> O <sub>2</sub> | 3-Furaldehyde                   | 498-60-2   | 96  | 17.82 | 0.032 |
| C <sub>6</sub> H <sub>12</sub> O             | n-Hexanal                       | 66-25-1    | 100 | 18.80 | 0.044 |
| C <sub>7</sub> H <sub>14</sub> O             | n-Heptanal                      | 111-71-7   | 114 | 23.01 | 0.036 |
| C <sub>7</sub> H <sub>6</sub> O              | Benzaldehyde                    | 100-52-7   | 106 | 23.72 | 0.061 |
| C <sub>8</sub> H <sub>16</sub> O             | 2-Ethylhexanal                  | 123-05-7   | 128 | 25.54 | 0.009 |
| C <sub>8</sub> H <sub>16</sub> O             | n-Octanal                       | 124-13-0   | 128 | 26.88 | 0.118 |
| C <sub>9</sub> H <sub>18</sub> O             | n-Nonanal                       | 124-19-6   | 142 | 30.44 | 0.167 |
| C <sub>10</sub> H <sub>20</sub> O            | n-Decanal                       | 112-31-2   | 156 | 33.73 | 0.167 |
| C <sub>11</sub> H <sub>22</sub> O            | n-Undecanal                     | 112-44-7   | 170 | 37.77 | 0.060 |
| C <sub>12</sub> H <sub>24</sub> O            | n-Dodecanal                     | 112-54-9   | 184 | 43.82 | 0.065 |
| C <sub>13</sub> H <sub>26</sub> O            | n-Tridecanal                    | 10486-19-8 | 198 | 53.48 | 0.085 |
| C <sub>14</sub> H <sub>28</sub> O            | n-Tetradecanal                  | 124-25-4   | 212 | 68.98 | 0.090 |
| C <sub>15</sub> H <sub>30</sub> O            | n-Pentadecanal                  | 2765-11-9  | 226 | 93.88 | 0.110 |
| <i>Ketones</i>                               |                                 |            |     |       |       |
| C <sub>3</sub> H <sub>6</sub> O              | 2-Propanone                     | 67-64-1    | 58  | 7.33  | 0.037 |
| C <sub>4</sub> H <sub>6</sub> O              | 2-Butenone                      | 78-94-4    | 70  | 9.98  | 0.004 |
| C <sub>4</sub> H <sub>6</sub> O <sub>2</sub> | 2,3-Butanedione                 | 431-03-8   | 86  | 10.33 | 0.003 |
| C <sub>4</sub> H <sub>8</sub> O              | 2-Butanone                      | 78-93-3    | 72  | 10.37 | 0.008 |
| C <sub>5</sub> H <sub>10</sub> O             | 2-Pentanone                     | 107-87-9   | 86  | 14.18 | 0.018 |
| C <sub>5</sub> H <sub>8</sub> O              | Cyclopentanone                  | 120-92-3   | 84  | 16.73 | 0.005 |
| C <sub>6</sub> H <sub>12</sub> O             | 2-Hexanone                      | 591-78-6   | 100 | 18.54 | 0.011 |
| C <sub>7</sub> H <sub>14</sub> O             | 2-Heptanone                     | 110-43-0   | 114 | 22.71 | 0.017 |
| C <sub>5</sub> H <sub>6</sub> O <sub>3</sub> | Dihydro-3-methyl-2,5-furandione | 4100-80-5  | 114 | 25.94 | 0.041 |
| C <sub>8</sub> H <sub>16</sub> O             | 2-Octanone                      | 111-13-7   | 128 | 26.57 | 0.068 |
| C <sub>9</sub> H <sub>18</sub> O             | 2-Nonanone                      | 821-55-6   | 142 | 30.13 | 0.047 |
| C <sub>10</sub> H <sub>20</sub> O            | 2-Decanone                      | 693-54-9   | 156 | 33.38 | 0.048 |
| C <sub>8</sub> H <sub>4</sub> O <sub>3</sub> | 1,3-Isobenzofurandione          | 85-44-9    | 148 | 35.13 | 0.032 |
| C <sub>11</sub> H <sub>22</sub> O            | 2-Undecanone                    | 53452-70-3 | 170 | 37.24 | 0.023 |
| C <sub>12</sub> H <sub>24</sub> O            | 2-Dodecanone                    | 6175-49-1  | 184 | 42.96 | 0.014 |
| C <sub>13</sub> H <sub>26</sub> O            | 3-Tridecanone                   | 1534-26-5  | 198 | 47.53 | 0.014 |
| C <sub>13</sub> H <sub>26</sub> O            | 2-Tridecanone                   | 593-08-8   | 198 | 51.97 | 0.092 |
| C <sub>14</sub> H <sub>28</sub> O            | 2-Tetradecanone                 | 2345-27-9  | 212 | 66.85 | 0.058 |
| C <sub>15</sub> H <sub>30</sub> O            | 2-Pentadecanone                 | 2345-28-0  | 226 | 90.06 | 0.207 |
| <i>Carboxylic acids</i>                      |                                 |            |     |       |       |

|                                                 |                               |            |     |        |        |
|-------------------------------------------------|-------------------------------|------------|-----|--------|--------|
| C <sub>2</sub> H <sub>4</sub> O <sub>2</sub>    | Acetic acid                   | 64-19-7    | 60  | 11.17  | 0.260  |
| C <sub>3</sub> H <sub>6</sub> O <sub>2</sub>    | n-Propanoic acid              | 79-09-4    | 74  | 15.51  | 0.016  |
| C <sub>4</sub> H <sub>8</sub> O <sub>2</sub>    | n-Butanoic acid               | 107-92-6   | 88  | 19.02  | 0.174  |
| C <sub>5</sub> H <sub>10</sub> O <sub>2</sub>   | 3-Methylbutanoic acid         | 503-74-2   | 102 | 22.10  | 0.018  |
| C <sub>5</sub> H <sub>10</sub> O <sub>2</sub>   | n-Pentanoic acid              | 109-52-4   | 102 | 23.13  | 0.064  |
| C <sub>6</sub> H <sub>12</sub> O <sub>2</sub>   | n-Hexanoic acid               | 142-62-1   | 116 | 26.62  | 0.229  |
| C <sub>7</sub> H <sub>14</sub> O <sub>2</sub>   | n-Heptanoic acid              | 111-14-8   | 130 | 30.16  | 0.076  |
| C <sub>8</sub> H <sub>16</sub> O <sub>2</sub>   | n-Octanoic acid               | 124-07-2   | 144 | 33.23  | 0.156  |
| C <sub>9</sub> H <sub>18</sub> O <sub>2</sub>   | n-Nonanoic acid               | 112-05-0   | 158 | 36.93  | 0.098  |
| C <sub>10</sub> H <sub>20</sub> O <sub>2</sub>  | n-Decanoic acid               | 334-48-5   | 172 | 42.46  | 0.098  |
| C <sub>11</sub> H <sub>22</sub> O <sub>2</sub>  | n-Undecanoic acid             | 112-37-8   | 186 | 51.87  | 0.017  |
| C <sub>12</sub> H <sub>24</sub> O <sub>2</sub>  | n-Dodecanoic acid             | 143-07-7   | 200 | 65.14  | 0.185  |
| C <sub>14</sub> H <sub>28</sub> O <sub>2</sub>  | n-Tetradecanoic acid          | 544-63-8   | 228 | 123.27 | 2.698  |
| <b>Heterocyclic compounds</b>                   |                               |            |     |        |        |
| <i>Dioxanes</i>                                 |                               |            |     |        |        |
| C <sub>4</sub> H <sub>8</sub> O <sub>2</sub>    | 1,4-Dioxane                   | 123-91-1   | 88  | 13.37  | 0.001  |
| <i>Furans</i>                                   |                               |            |     |        |        |
| C <sub>5</sub> H <sub>6</sub> O                 | 2-Methylfuran                 | 534-22-5   | 82  | 10.14  | 0.001  |
| C <sub>6</sub> H <sub>8</sub> O                 | 2-Ethylfuran                  | 3208-16-0  | 96  | 13.98  | <0.001 |
| C <sub>6</sub> H <sub>6</sub> O                 | 2-Vinylfuran                  | 1487-18-9  | 94  | 14.68  | <0.001 |
| C <sub>8</sub> H <sub>12</sub> O                | 2-Butylfuran                  | 4466-24-4  | 124 | 23.29  | 0.003  |
| C <sub>9</sub> H <sub>14</sub> O                | 2-Pentylfuran                 | 3777-69-3  | 138 | 26.19  | 0.005  |
| <b>Nitrogenated compounds</b>                   |                               |            |     |        |        |
| N <sub>2</sub>                                  | Nitrogen                      | 7727-37-9  | 28  | 1.53   | 5.025  |
| C <sub>2</sub> H <sub>3</sub> N                 | Acetonitrile                  | 75-05-8    | 41  | 6.53   | 0.069  |
| C <sub>3</sub> H <sub>5</sub> N                 | Propargylamine                | 2450-71-7  | 55  | 9.06   | 0.002  |
| C <sub>4</sub> H <sub>5</sub> N                 | Pyrrole                       | 109-97-7   | 67  | 14.22  | 0.013  |
| C <sub>2</sub> H <sub>5</sub> NO                | Acetamide                     | 60-35-5    | 59  | 14.81  | 0.054  |
| C <sub>5</sub> H <sub>5</sub> N                 | Pyridine                      | 110-86-1   | 79  | 14.93  | 0.005  |
| C <sub>5</sub> H <sub>7</sub> N                 | 3-Methyl-1H-pyrrole           | 616-43-3   | 81  | 14.78  | 0.001  |
| C <sub>3</sub> H <sub>5</sub> NO <sub>2</sub>   | 2-Oxo-propionamide            | x          | 87  | 16.81  | 0.038  |
| C <sub>6</sub> H <sub>9</sub> N                 | 2,3-dimethyl-1H-pyrrole       | 600-28-2   | 95  | 18.04  | 0.002  |
| C <sub>6</sub> H <sub>7</sub> N                 | 2-Methylpyridine              | 109-06-8   | 93  | 18.37  | 0.002  |
| C <sub>6</sub> H <sub>7</sub> N                 | 3-Methylpyridine              | 108-99-6   | 93  | 20.00  | 0.002  |
| C <sub>6</sub> H <sub>7</sub> N                 | 4-Methylpyridine              | 108-89-4   | 93  | 20.10  | 0.003  |
| C <sub>3</sub> H <sub>4</sub> N <sub>2</sub>    | 1H-Pyrazole                   | 288-13-1   | 68  | 22.25  | 0.018  |
| C <sub>5</sub> H <sub>11</sub> NO               | Pentanamide                   | 626-97-1   | 101 | 25.62  | 0.020  |
| C <sub>4</sub> H <sub>7</sub> NO                | 2-Pyrrolidinone               | 616-45-5   | 85  | 25.75  | 0.021  |
| C <sub>6</sub> H <sub>8</sub> N <sub>2</sub> O  | 2-Methoxy-6-methyl-pyrazine   | 2882-21-5  | 124 | 27.08  | 0.022  |
| C <sub>4</sub> H <sub>5</sub> NO <sub>2</sub>   | Succinimide                   | 123-56-8   | 99  | 28.03  | 0.038  |
| C <sub>10</sub> H <sub>11</sub> NO <sub>4</sub> | Acetate 3-nitrobenzeneethanol | 68527-46-8 | 209 | 96.09  | 0.369  |
| C <sub>11</sub> H <sub>23</sub> NO              | Undecanamide                  | x          | 185 | 97.87  | 0.059  |
| C <sub>12</sub> H <sub>25</sub> NO              | Dodecanamide                  | 1120-16-7  | 199 | 128.71 | 0.041  |

| Sulfonated compounds                         |                    |           |    |       |        |
|----------------------------------------------|--------------------|-----------|----|-------|--------|
| H <sub>2</sub> S                             | Hydrogen sulfide   | 7783-06-4 | 34 | 2.69  | 0.004  |
| COS                                          | Carbonyl sulfide   | 463-58-1  | 60 | 3.33  | 0.004  |
| O <sub>2</sub> S                             | Sulfur dioxide     | 7446-09-5 | 64 | 5.37  | 0.115  |
| CH <sub>4</sub> S                            | Methanethiol       | 74-93-1   | 48 | 5.37  | 0.006  |
| CS <sub>2</sub>                              | Carbon disulfide   | 75-15-0   | 76 | 7.67  | 0.003  |
| C <sub>3</sub> H <sub>8</sub> S              | (Methylthio)ethane | 624-89-5  | 76 | 10.84 | 0.001  |
| C <sub>2</sub> H <sub>6</sub> S <sub>2</sub> | Dimethyl disulfide | 624-92-0  | 94 | 15.15 | 0.003  |
| C <sub>5</sub> H <sub>6</sub> S              | 2-Methylthiophene  | 554-14-3  | 98 | 15.79 | 0.001  |
| C <sub>5</sub> H <sub>6</sub> S              | 3-Methylthiophene  | 616-44-4  | 98 | 17.89 | 0.001  |
| Inorganic compounds                          |                    |           |    |       |        |
| <i>Oxides</i>                                |                    |           |    |       |        |
| CO <sub>2</sub>                              | Carbon dioxide     | 124-38-9  | 44 | 1.73  | 8.451  |
| H <sub>2</sub> O                             | Water              | 7732-18-5 | 18 | 2.94  | 75.079 |
| <i>Noble gases</i>                           |                    |           |    |       |        |
| Ar                                           | Argon              | 7440-37-1 | 40 | 1.50  | 0.048  |

Note: 1CAS/(NIST) – unique numerical identifier of chemical compounds included in the register Chemical Abstracts Service (<https://www.cas.org>) or NIST number (a unique number given to each spectrum in the NIST archive); 2MW – nominal mass; 3RT – retention time; 4A – normalized area (the area ratio of the individual gas mixture components to the sum of the areas of all the components in the chromatogram).
