# Supplementary material
Source: MDPI journal article supplement (https://www.mdpi.com/2075-163X/11/10/1090)
Supplement: s1 [file s1]

Table S7. Results of GC–MS analysis of volatiles extracted by mechanical shock crushing from calcite (Blagodatnoye deposit, Yenisei ridge).

| Formula                | Name                        | <sup>1</sup> CAS | <sup>2</sup> MW | Calcite 35/178.1     |                   |
|------------------------|-----------------------------|------------------|-----------------|----------------------|-------------------|
|                        |                             |                  |                 | <sup>3</sup> RT, min | <sup>4</sup> A, % |
| Aliphatic hydrocarbons |                             |                  |                 |                      |                   |
| Paraffins              |                             |                  |                 |                      |                   |
| CH4                    | Methane                     | 74-82-8          | 16              | 1.70                 | 0.345             |
| C5H12                  | n-Pentane                   | 109-66-0         | 72              | 7.73                 | <0.001            |
| C6H14                  | 2,3-Dimethylbutane          | 79-29-8          | 86              | 7.89                 | 0.001             |
| C6H14                  | n-Hexane                    | 110-54-3         | 86              | 11.41                | 0.003             |
| C7H16                  | n-Heptane                   | 142-82-5         | 100             | 15.34                | 0.004             |
| C8H16                  | 3-Methyleneheptane          | 1632-16-2        | 112             | 18.78                | 0.001             |
| C8H18                  | n-Octane                    | 111-65-9         | 114             | 19.37                | 0.005             |
| C9H20                  | n-Nonane                    | 111-84-2         | 128             | 23.20                | 0.007             |
| C10H22                 | n-Decane                    | 124-18-5         | 142             | 26.76                | 0.005             |
| C11H24                 | n-Undecane                  | 1120-21-4        | 156             | 30.04                | 0.003             |
| C12H26                 | n-Dodecane                  | 112-40-3         | 170             | 33.11                | 0.002             |
| C13H28                 | n-Tridecane                 | 629-50-5         | 184             | 36.55                | 0.004             |
| C14H30                 | n-Tetradecane               | 629-59-4         | 198             | 41.68                | 0.004             |
| C15H32                 | n-Pentadecane               | 629-62-9         | 212             | 47.38                | 0.008             |
| C17H36                 | 3-Methylhexadecane          | 6418-43-5        | 240             | 75.81                | 0.105             |
| C17H36                 | n-Heptadecane               | 629-78-7         | 240             | 88.06                | 0.074             |
| Olefins                |                             |                  |                 |                      |                   |
| C4H8                   | 1-Butene                    | 106-98-9         | 56              | 5.71                 | 0.003             |
| C4H8                   | 2-Butene                    | 107-01-7         | 56              | 6.03                 | 0.001             |
| C5H8                   | (E)-1,3-Pentadiene          | 2004-70-8        | 68              | 8.18                 | 0.001             |
| C5H8                   | 1,3-Pentadiene              | 504-60-9         | 68              | 8.31                 | <0.001            |
| C5H8                   | (Z)-1,3-Pentadiene          | 1574-41-0        | 68              | 8.64                 | <0.001            |
| C6H12                  | 1-Hexene                    | 592-41-6         | 84              | 11.12                | 0.002             |
| C6H12                  | 2-Hexene                    | 592-43-8         | 84              | 11.26                | <0.001            |
| C7H14                  | 2,4-Dimethyl-1-pentene      | 2213-32-3        | 98              | 12.11                | 0.003             |
| C6H10                  | (E)-3-Methyl-1,3-pentadiene | 2787-43-1        | 82              | 12.22                | 0.001             |
| C6H10                  | (E)-2-Methyl-1,3-pentadiene | 926-54-5         | 82              | 12.46                | <0.001            |
| C7H14                  | 1-Heptene                   | 592-76-7         | 98              | 14.74                | <0.001            |
| C8H16                  | 1-Octene                    | 111-66-0         | 112             | 19.07                | 0.002             |
| C9H18                  | 1-Nonene                    | 124-11-8         | 126             | 22.95                | 0.002             |
| C10H20                 | 1-Decene                    | 872-05-9         | 140             | 26.53                | 0.002             |
| C11H22                 | 1-Undecene                  | 821-95-4         | 154             | 29.84                | 0.002             |
| C13H26                 | 1-Tridecene                 | 2437-56-1        | 182             | 36.34                | 0.005             |
| C14H28                 | 1-Tetradecene               | 1120-36-1        | 196             | 41.40                | 0.008             |
| C15H30                 | 1-Pentadecene               | 13360-61-7       | 210             | 49.21                | 0.012             |
| C16H32                 | 1-Hexadecene                | 629-73-2         | 224             | 61.68                | 0.013             |

| Cyclic hydrocarbons                               |                       |           |     |        |        |
|---------------------------------------------------|-----------------------|-----------|-----|--------|--------|
| <i>Cycloalkanes (naphthenes) and cycloalkenes</i> |                       |           |     |        |        |
| C <sub>6</sub> H <sub>10</sub>                    | 3-Methylcyclopentene  | 1120-62-3 | 82  | 11.59  | <0.001 |
| C <sub>6</sub> H <sub>10</sub>                    | 4-Methylcyclopentene  | 1759-81-5 | 82  | 11.91  | <0.001 |
| <i>Arenes</i>                                     |                       |           |     |        |        |
| C <sub>6</sub> H <sub>6</sub>                     | Benzene               | 71-43-2   | 78  | 12.01  | 0.006  |
| C <sub>7</sub> H <sub>8</sub>                     | Toluene               | 108-88-3  | 92  | 16.34  | 0.003  |
| C <sub>7</sub> H <sub>7</sub> F                   | (Fluoromethyl)benzene | 350-50-5  | 110 | 19.95  | <0.001 |
| C <sub>8</sub> H <sub>10</sub>                    | Ethylbenzene          | 100-41-4  | 106 | 20.32  | 0.001  |
| C <sub>8</sub> H <sub>10</sub>                    | p-Xylene              | 106-42-3  | 106 | 20.58  | 0.005  |
| C <sub>8</sub> H <sub>10</sub>                    | o-Xylene              | 95-47-6   | 106 | 20.68  | 0.001  |
| C <sub>8</sub> H <sub>10</sub>                    | m-Xylene              | 108-38-3  | 106 | 20.85  | <0.001 |
| C <sub>8</sub> H <sub>8</sub>                     | Styrene               | 100-42-5  | 104 | 21.23  | 0.001  |
| C <sub>8</sub> H <sub>9</sub> F                   | p-Fluoroethylbenzene  | 459-47-2  | 124 | 22.93  | <0.001 |
| C <sub>9</sub> H <sub>12</sub>                    | Propylbenzene         | 103-65-1  | 120 | 24.10  | 0.001  |
| C <sub>10</sub> H <sub>14</sub>                   | Butylbenzene          | 104-51-8  | 134 | 27.81  | 0.002  |
| C <sub>11</sub> H <sub>16</sub>                   | Pentylbenzene         | 538-68-1  | 148 | 31.17  | 0.002  |
| C <sub>12</sub> H <sub>18</sub>                   | Hexylbenzene          | 1077-16-3 | 162 | 34.39  | 0.003  |
| C <sub>13</sub> H <sub>20</sub>                   | Heptylbenzene         | 1078-71-3 | 176 | 38.62  | 0.003  |
| C <sub>14</sub> H <sub>22</sub>                   | Octylbenzene          | 2189-60-8 | 190 | 44.96  | 0.004  |
| C <sub>15</sub> H <sub>24</sub>                   | Nonylbenzene          | 1081-77-2 | 204 | 54.86  | 0.004  |
| C <sub>16</sub> H <sub>26</sub>                   | Decylbenzene          | 104-72-3  | 218 | 70.46  | <0.001 |
| <i>PAH (Polycyclic aromatic hydrocarbons)</i>     |                       |           |     |        |        |
| C <sub>10</sub> H <sub>8</sub>                    | Naphthalene           | 91-20-3   | 128 | 31.36  | <0.001 |
| Oxygenated hydrocarbons                           |                       |           |     |        |        |
| <i>Alcohols</i>                                   |                       |           |     |        |        |
| CH <sub>4</sub> O                                 | Methanol              | 67-56-1   | 32  | 4.41   | 0.136  |
| C <sub>2</sub> H <sub>6</sub> O                   | Ethanol               | 64-17-5   | 46  | 6.28   | 0.031  |
| C <sub>4</sub> H <sub>10</sub> O                  | 1-Butanol             | 71-36-3   | 74  | 12.57  | 0.004  |
| C <sub>6</sub> H <sub>6</sub> O                   | Phenol                | 108-95-2  | 94  | 24.10  | 0.003  |
| <i>Ethers and esters</i>                          |                       |           |     |        |        |
| C <sub>5</sub> H <sub>8</sub> O                   | 3,4-Dihydro-2H-pyran  | 110-87-2  | 84  | 12.99  | <0.001 |
| C <sub>5</sub> H <sub>8</sub> O <sub>2</sub>      | Methyl methacrylate   | 80-62-6   | 100 | 13.96  | 0.001  |
| C <sub>4</sub> H <sub>6</sub> O <sub>2</sub>      | Butyrolactone         | 96-48-0   | 86  | 20.68  | <0.001 |
| C <sub>6</sub> H <sub>10</sub> O <sub>2</sub>     | γ-Hexalactone         | 695-06-7  | 114 | 27.04  | <0.001 |
| C <sub>7</sub> H <sub>12</sub> O <sub>2</sub>     | γ-Heptalactone        | 105-21-5  | 128 | 30.57  | <0.001 |
| C <sub>8</sub> H <sub>14</sub> O <sub>2</sub>     | γ-Octalactone         | 104-50-7  | 142 | 33.89  | 0.001  |
| C <sub>9</sub> H <sub>16</sub> O <sub>2</sub>     | γ-Nonalactone         | 104-61-0  | 156 | 37.90  | 0.001  |
| C <sub>10</sub> H <sub>18</sub> O <sub>2</sub>    | γ-Decalactone         | 706-14-9  | 170 | 43.96  | 0.001  |
| C <sub>11</sub> H <sub>20</sub> O <sub>2</sub>    | γ-Undecalactone       | 104-67-6  | 184 | 53.29  | 0.001  |
| C <sub>12</sub> H <sub>14</sub> O <sub>4</sub>    | Diethyl Phthalate     | 84-66-2   | 222 | 56.29  | 0.314  |
| C <sub>12</sub> H <sub>22</sub> O <sub>2</sub>    | γ-Dodecalactone       | 2305-05-7 | 198 | 68.16  | 0.001  |
| C <sub>14</sub> H <sub>26</sub> O <sub>2</sub>    | γ-Tetradecalactone    | x         | 226 | 129.61 | 0.004  |
| C <sub>16</sub> H <sub>22</sub> O <sub>4</sub>    | Dibutyl phthalate     | 84-74-2   | 278 | 92.79  | 0.637  |
| <i>Aldehydes</i>                                  |                       |           |     |        |        |
| C <sub>2</sub> H <sub>4</sub> O                   | Acetaldehyde          | 75-07-0   | 44  | 5.20   | 0.257  |

|                                              |                           |            |     |        |        |
|----------------------------------------------|---------------------------|------------|-----|--------|--------|
| C <sub>3</sub> H <sub>4</sub> O              | 2-Propenal                | 107-02-8   | 56  | 7.13   | 0.003  |
| C <sub>3</sub> H <sub>6</sub> O              | n-Propanal                | 123-38-6   | 58  | 7.29   | 0.001  |
| C <sub>4</sub> H <sub>6</sub> O              | 2-Methyl-2-propenal       | 78-85-3    | 70  | 9.43   | 0.006  |
| C <sub>4</sub> H <sub>8</sub> O              | 2-Methylpropanal          | 78-84-2    | 72  | 9.44   | 0.007  |
| C <sub>4</sub> H <sub>8</sub> O              | n-Butanal                 | 123-72-8   | 72  | 10.21  | 0.001  |
| C <sub>4</sub> H <sub>6</sub> O              | 2-Butenal                 | 4170-30-3  | 70  | 11.84  | 0.001  |
| C <sub>5</sub> H <sub>10</sub> O             | 3-Methylbutanal           | 590-86-3   | 86  | 13.26  | 0.003  |
| C <sub>5</sub> H <sub>10</sub> O             | n-Pentanal                | 110-62-3   | 86  | 14.22  | 0.002  |
| C <sub>5</sub> H <sub>4</sub> O <sub>2</sub> | Furfural                  | 98-01-1    | 96  | 17.05  | <0.001 |
| C <sub>5</sub> H <sub>4</sub> O <sub>2</sub> | 3-Furaldehyde             | 498-60-2   | 96  | 17.95  | 0.002  |
| C <sub>6</sub> H <sub>12</sub> O             | n-Hexanal                 | 66-25-1    | 100 | 18.47  | 0.007  |
| C <sub>7</sub> H <sub>14</sub> O             | n-Heptanal                | 111-71-7   | 114 | 22.53  | 0.003  |
| C <sub>7</sub> H <sub>6</sub> O              | Benzaldehyde              | 100-52-7   | 106 | 23.53  | 0.006  |
| C <sub>8</sub> H <sub>16</sub> O             | 2-Ethylhexanal            | 123-05-7   | 128 | 24.93  | 0.002  |
| C <sub>8</sub> H <sub>16</sub> O             | n-Octanal                 | 124-13-0   | 128 | 26.26  | 0.003  |
| C <sub>6</sub> H <sub>4</sub> O <sub>3</sub> | 2,5-Furandicarboxaldehyde | 823-82-5   | 124 | 27.39  | 0.002  |
| C <sub>9</sub> H <sub>18</sub> O             | n-Nonanal                 | 124-19-6   | 142 | 29.71  | 0.005  |
| C <sub>10</sub> H <sub>20</sub> O            | n-Decanal                 | 112-31-2   | 156 | 32.89  | 0.094  |
| C <sub>15</sub> H <sub>30</sub> O            | n-Pentadecanal            | 2765-11-9  | 226 | 81.49  | 0.013  |
| C <sub>16</sub> H <sub>32</sub> O            | n-Hexadecanal             | 629-80-1   | 240 | 112.84 | 0.018  |
| <i>Ketones</i>                               |                           |            |     |        |        |
| C <sub>3</sub> H <sub>6</sub> O              | 2-Propanone               | 67-64-1    | 58  | 7.51   | 0.006  |
| C <sub>4</sub> H <sub>6</sub> O <sub>2</sub> | 2,3-Butanedione           | 431-03-8   | 86  | 10.31  | <0.001 |
| C <sub>4</sub> H <sub>8</sub> O              | 2-Butanone                | 78-93-3    | 72  | 10.36  | 0.001  |
| C <sub>5</sub> H <sub>10</sub> O             | 2-Pentanone               | 107-87-9   | 86  | 14.06  | <0.001 |
| C <sub>5</sub> H <sub>8</sub> O              | Cyclopentanone            | 120-92-3   | 84  | 16.50  | 0.002  |
| C <sub>3</sub> H <sub>6</sub> O <sub>2</sub> | 1-Hydroxy-2-propanone     | 116-09-6   | 74  | 15.92  | 0.002  |
| C <sub>6</sub> H <sub>12</sub> O             | 2-Hexanone                | 591-78-6   | 100 | 18.25  | 0.001  |
| C <sub>7</sub> H <sub>14</sub> O             | 2-Heptanone               | 110-43-0   | 114 | 22.27  | 0.004  |
| C <sub>8</sub> H <sub>16</sub> O             | 3-Octanone                | 106-68-3   | 128 | 25.20  | 0.002  |
| C <sub>8</sub> H <sub>16</sub> O             | 2-Octanone                | 111-13-7   | 128 | 25.98  | 0.001  |
| C <sub>9</sub> H <sub>18</sub> O             | 2-Nonanone                | 821-55-6   | 142 | 29.39  | 0.001  |
| C <sub>10</sub> H <sub>20</sub> O            | 2-Decanone                | 693-54-9   | 156 | 32.57  | 0.002  |
| C <sub>8</sub> H <sub>4</sub> O <sub>3</sub> | 1,3-Isobenzofurandione    | 85-44-9    | 148 | 35.30  | 0.014  |
| C <sub>11</sub> H <sub>22</sub> O            | 2-Undecanone              | 53452-70-3 | 170 | 35.89  | 0.004  |
| C <sub>12</sub> H <sub>24</sub> O            | 2-Dodecanone              | 6175-49-1  | 184 | 40.72  | 0.003  |
| C <sub>13</sub> H <sub>26</sub> O            | 2-Tridecanone             | 593-08-8   | 198 | 48.16  | 0.004  |
| C <sub>14</sub> H <sub>28</sub> O            | 2-Tetradecanone           | 2345-27-9  | 212 | 59.94  | 0.005  |
| C <sub>15</sub> H <sub>30</sub> O            | 2-Pentadecanone           | 2345-28-0  | 226 | 78.86  | 0.019  |
| C <sub>16</sub> H <sub>32</sub> O            | 2-Hexadecanone            | 18787-63-8 | 240 | 108.31 | 0.013  |
| <i>Carboxylic acids</i>                      |                           |            |     |        |        |
| C <sub>2</sub> H <sub>4</sub> O <sub>2</sub> | Acetic acid               | 64-19-7    | 60  | 10.96  | 0.041  |
| C <sub>3</sub> H <sub>6</sub> O <sub>2</sub> | n-Propanoic acid          | 79-09-4    | 74  | 14.80  | 0.001  |

|                                                |                         |           |     |        |        |
|------------------------------------------------|-------------------------|-----------|-----|--------|--------|
| C <sub>4</sub> H <sub>8</sub> O <sub>2</sub>   | n-Butanoic acid         | 107-92-6  | 88  | 18.39  | 0.018  |
| C <sub>5</sub> H <sub>10</sub> O <sub>2</sub>  | 3-Methylbutanoic acid   | 503-74-2  | 102 | 21.32  | 0.002  |
| C <sub>5</sub> H <sub>10</sub> O <sub>2</sub>  | n-Pentanoic acid        | 109-52-4  | 102 | 22.25  | 0.012  |
| C <sub>6</sub> H <sub>12</sub> O <sub>2</sub>  | n-Hexanoic acid         | 142-62-1  | 116 | 25.70  | 0.067  |
| C <sub>7</sub> H <sub>14</sub> O <sub>2</sub>  | n-Heptanoic acid        | 111-14-8  | 130 | 29.06  | 0.021  |
| C <sub>8</sub> H <sub>16</sub> O <sub>2</sub>  | n-Octanoic acid         | 124-07-2  | 144 | 32.12  | 0.043  |
| C <sub>9</sub> H <sub>18</sub> O <sub>2</sub>  | n-Nonanoic acid         | 112-05-0  | 158 | 35.22  | 0.061  |
| C <sub>10</sub> H <sub>20</sub> O <sub>2</sub> | n-Decanoic acid         | 334-48-5  | 172 | 39.67  | 0.037  |
| C <sub>11</sub> H <sub>22</sub> O <sub>2</sub> | n-Undecanoic acid       | 112-37-8  | 186 | 46.63  | 0.022  |
| C <sub>12</sub> H <sub>24</sub> O <sub>2</sub> | n-Dodecanoic acid       | 143-07-7  | 200 | 57.37  | 0.031  |
| C <sub>14</sub> H <sub>28</sub> O <sub>2</sub> | n-Tetradecanoic acid    | 544-63-8  | 228 | 102.70 | 0.049  |
| <b>Heterocyclic compounds</b>                  |                         |           |     |        |        |
| <i>Dioxanes</i>                                |                         |           |     |        |        |
| C <sub>4</sub> H <sub>8</sub> O <sub>2</sub>   | 1,4-Dioxane             | 123-91-1  | 88  | 13.19  | <0.001 |
| <i>Furans</i>                                  |                         |           |     |        |        |
| C <sub>5</sub> H <sub>6</sub> O                | 2-Methylfuran           | 534-22-5  | 82  | 9.86   | <0.001 |
| C <sub>5</sub> H <sub>6</sub> O                | 3-Methylfuran           | 930-27-8  | 82  | 10.16  | <0.001 |
| C <sub>6</sub> H <sub>8</sub> O                | 2,5-Dimethylfuran       | 625-86-5  | 96  | 14.51  | <0.001 |
| C <sub>9</sub> H <sub>14</sub> O               | 2-Pentylfuran           | 3777-69-3 | 138 | 25.28  | <0.001 |
| C <sub>10</sub> H <sub>16</sub> O              | 2-Hexylfuran            | 3777-70-6 | 152 | 28.79  | <0.001 |
| <b>Nitrogenated compounds</b>                  |                         |           |     |        |        |
| N <sub>2</sub>                                 | Nitrogen                | 7727-37-9 | 28  | 1.83   | 23.184 |
| H <sub>3</sub> N                               | Ammonia                 | 7664-41-7 | 17  | 2.81   | 0.066  |
| C <sub>2</sub> H <sub>3</sub> N                | Acetonitrile            | 75-05-8   | 41  | 6.81   | 0.014  |
| C <sub>3</sub> H <sub>5</sub> N                | Propargylamine          | 2450-71-7 | 55  | 9.24   | <0.001 |
| C <sub>4</sub> H <sub>5</sub> N                | Pyrrole                 | 109-97-7  | 67  | 14.17  | 0.002  |
| C <sub>5</sub> H <sub>5</sub> N                | Pyridine                | 110-86-1  | 79  | 15.32  | 0.001  |
| C <sub>2</sub> H <sub>5</sub> NO               | Acetamide               | 60-35-5   | 59  | 16.27  | 0.007  |
| C <sub>3</sub> H <sub>5</sub> NO <sub>2</sub>  | 2-Oxo-propionamide      | x         | 87  | 17.25  | 0.002  |
| C <sub>6</sub> H <sub>9</sub> N                | 2,3-Dimethyl-1H-pyrrole | 600-28-2  | 95  | 18.04  | <0.001 |
| C <sub>6</sub> H <sub>7</sub> N                | 2-Methylpyridine        | 109-06-8  | 93  | 18.57  | <0.001 |
| C <sub>6</sub> H <sub>7</sub> N                | 3-Methylpyridine        | 108-99-6  | 93  | 20.27  | <0.001 |
| C <sub>6</sub> H <sub>7</sub> N                | 4-Methylpyridine        | 108-89-4  | 93  | 20.53  | <0.001 |
| C <sub>5</sub> H <sub>11</sub> NO              | Pentanamide             | 626-97-1  | 101 | 27.28  | <0.001 |
| C <sub>4</sub> H <sub>5</sub> NO <sub>2</sub>  | Succinimide             | 123-56-8  | 99  | 28.59  | 0.003  |
| C <sub>6</sub> H <sub>13</sub> NO              | Hexanamide              | 628-02-4  | 115 | 30.71  | 0.001  |
| C <sub>7</sub> H <sub>15</sub> NO              | Heptanamide             | 628-62-6  | 129 | 33.87  | <0.001 |
| C <sub>8</sub> H <sub>17</sub> NO              | Octanamide              | 629-01-6  | 143 | 37.80  | 0.001  |
| C <sub>9</sub> H <sub>19</sub> NO              | Nonanamide              | 1120-07-6 | 157 | 43.55  | 0.001  |
| C <sub>10</sub> H <sub>21</sub> NO             | Decanamide              | 2319-29-1 | 171 | 52.53  | 0.002  |
| <b>Sulfonated compounds</b>                    |                         |           |     |        |        |
| H <sub>2</sub> S                               | Hydrogen sulfide        | 7783-06-4 | 34  | 2.75   | 0.009  |
| COS                                            | Carbonyl sulfide        | 463-58-1  | 60  | 3.20   | 0.001  |
| O <sub>2</sub> S                               | Sulfur dioxide          | 7446-09-5 | 64  | 5.00   | 0.164  |
| CH <sub>4</sub> S                              | Methanethiol            | 74-93-1   | 48  | 5.33   | 0.045  |

|                                              |                    |           |    |       |        |
|----------------------------------------------|--------------------|-----------|----|-------|--------|
| CS <sub>2</sub>                              | Carbon disulfide   | 75-15-0   | 76 | 7.51  | 0.003  |
| C <sub>4</sub> H <sub>4</sub> S              | Thiophene          | 110-02-1  | 84 | 11.77 | <0.001 |
| C <sub>2</sub> H <sub>6</sub> S <sub>2</sub> | Dimethyl disulfide | 624-92-0  | 94 | 14.75 | <0.001 |
| C <sub>5</sub> H <sub>6</sub> S              | 2-Methylthiophene  | 554-14-3  | 98 | 15.85 | <0.001 |
| C <sub>5</sub> H <sub>6</sub> S              | 3-Methylthiophene  | 616-44-4  | 98 | 16.22 | <0.001 |
| <b>Inorganic compounds</b>                   |                    |           |    |       |        |
| <i>Oxides</i>                                |                    |           |    |       |        |
| CO <sub>2</sub>                              | Carbon dioxide     | 124-38-9  | 44 | 1.87  | 15.089 |
| H <sub>2</sub> O                             | Water              | 7732-18-5 | 18 | 3.28  | 58.672 |
| <i>Noble gases</i>                           |                    |           |    |       |        |
| Ar                                           | Argon              | 7440-37-1 | 40 | 1.62  | 0.003  |

Note: <sup>1</sup>CAS – unique numerical identifier of chemical compounds included in the register Chemical Abstracts Service (<https://www.cas.org>); <sup>2</sup>MW – nominal mass; <sup>3</sup>RT – retention time; <sup>4</sup>A – normalized area (the area ratio of the individual gas mixture components to the sum of the areas of all the components in the chromatogram).
