# Supplementary material
Source: MDPI journal article supplement (https://www.mdpi.com/2075-163X/11/10/1090)
Supplement: s1 [file s1]

Table S6. Results of GC–MS analysis of volatiles extracted by mechanical shock crushing from pyrrhotite (Blagodatnoye deposit, Yenisei ridge).

| Formula                | Name                        | <sup>1</sup> CAS/(NIST) | <sup>2</sup> MW | Pyrrhotite 34/105.9  |                   |
|------------------------|-----------------------------|-------------------------|-----------------|----------------------|-------------------|
|                        |                             |                         |                 | <sup>3</sup> RT, min | <sup>4</sup> A, % |
| Aliphatic hydrocarbons |                             |                         |                 |                      |                   |
| Paraffins              |                             |                         |                 |                      |                   |
| CH4                    | Methane                     | 74-82-8                 | 16              | 1.80                 | 0.329             |
| C3H8                   | n-Propane                   | 74-98-6                 | 44              | 3.88                 | 0.024             |
| C4H10                  | n-Butane                    | 106-97-8                | 58              | 5.91                 | 0.003             |
| C5H12                  | n-Pentane                   | 109-66-0                | 72              | 7.69                 | 0.137             |
| C6H14                  | n-Hexane                    | 110-54-3                | 86              | 11.42                | 0.048             |
| C7H16                  | n-Heptane                   | 142-82-5                | 100             | 15.34                | 0.024             |
| C8H18                  | 3-Methylheptane             | 589-81-1                | 114             | 18.54                | 0.029             |
| C8H18                  | n-Octane                    | 111-65-9                | 114             | 19.37                | 0.041             |
| C9H20                  | n-Nonane                    | 111-84-2                | 128             | 23.20                | 0.047             |
| C10H22                 | n-Decane                    | 124-18-5                | 142             | 26.76                | 0.024             |
| C11H24                 | n-Undecane                  | 1120-21-4               | 156             | 30.06                | 0.035             |
| C12H26                 | n-Dodecane                  | 112-40-3                | 170             | 33.62                | 0.033             |
| C13H28                 | n-Tridecane                 | 629-50-5                | 184             | 36.57                | 0.018             |
| C14H30                 | n-Tetradecane               | 629-59-4                | 198             | 41.73                | 0.020             |
| C15H32                 | n-Pentadecane               | 629-62-9                | 212             | 49.73                | 0.028             |
| Halogenated paraffins  |                             |                         |                 |                      |                   |
| C10H21Cl               | 1-Chlorodecane              | 1002-69-3               | 176             | 36.41                | 0.026             |
| Olefins                |                             |                         |                 |                      |                   |
| C4H8                   | 2-Methyl-1-propene          | 115-11-7                | 56              | 5.53                 | 0.013             |
| C4H8                   | 1-Butene                    | 106-98-9                | 56              | 5.73                 | 0.040             |
| C4H8                   | 2-Butene                    | 107-01-7                | 56              | 5.93                 | 0.018             |
| C4H8                   | (E)-2-Butene                | 624-64-6                | 56              | 6.03                 | 0.012             |
| C5H8                   | (E)-1,3-Pentadiene          | 2004-70-8               | 68              | 7.78                 | 0.005             |
| C5H8                   | 1,3-Pentadiene              | 504-60-9                | 68              | 8.16                 | 0.018             |
| C5H8                   | (Z)-1,3-Pentadiene          | 1574-41-0               | 68              | 8.63                 | 0.004             |
| C6H12                  | 1-Hexene                    | 592-41-6                | 84              | 11.12                | 0.002             |
| C6H12                  | 2-Hexene                    | 592-43-8                | 84              | 11.29                | 0.001             |
| C6H10                  | 2,3-Dimethyl-1,3-butadiene  | 513-81-5                | 82              | 12.21                | 0.005             |
| C6H10                  | 3-Hexyne                    | 928-49-4                | 82              | 12.46                | 0.002             |
| C6H10                  | (E)-2-Methyl-1,3-pentadiene | 926-54-5                | 82              | 12.76                | 0.002             |
| C7H14                  | 1-Heptene                   | 592-76-7                | 98              | 15.00                | 0.016             |
| C8H16                  | (Z)-3-Octene                | 14850-22-7              | 112             | 18.73                | 0.006             |
| C8H16                  | (E)-2-Octene                | 13389-42-9              | 112             | 18.97                | 0.004             |
| C8H16                  | (Z)-2-Octene                | 7642-04-8               | 112             | 19.03                | 0.002             |
| C8H16                  | 1-Octene                    | 111-66-0                | 112             | 19.15                | 0.004             |
| C8H16                  | 2-Octene                    | 111-67-1                | 112             | 19.25                | 0.001             |
| C8H16                  | 3-Methyl-2-heptene          | 3404-75-9               | 112             | 19.48                | 0.001             |

|                                                   |                                   |            |     |       |       |
|---------------------------------------------------|-----------------------------------|------------|-----|-------|-------|
| C <sub>9</sub> H <sub>18</sub>                    | 1-Nonene                          | 124-11-8   | 126 | 22.95 | 0.014 |
| C <sub>10</sub> H <sub>20</sub>                   | 1-Decene                          | 872-05-9   | 140 | 26.55 | 0.005 |
| C <sub>11</sub> H <sub>22</sub>                   | 1-Undecene                        | 821-95-4   | 154 | 29.86 | 0.016 |
| C <sub>12</sub> H <sub>24</sub>                   | 1-Dodecene                        | 112-41-4   | 168 | 33.11 | 0.002 |
| C <sub>13</sub> H <sub>26</sub>                   | 1-Tridecene                       | 2437-56-1  | 182 | 36.37 | 0.036 |
| C <sub>14</sub> H <sub>28</sub>                   | 1-Tetradecene                     | 1120-36-1  | 196 | 41.43 | 0.048 |
| C <sub>15</sub> H <sub>30</sub>                   | 1-Pentadecene                     | 13360-61-7 | 210 | 49.28 | 0.077 |
| C <sub>16</sub> H <sub>32</sub>                   | 1-Hexadecene                      | 629-73-2   | 224 | 61.86 | 0.607 |
| <b>Cyclic hydrocarbons</b>                        |                                   |            |     |       |       |
| <i>Cycloalkanes (naphthenes) and cycloalkenes</i> |                                   |            |     |       |       |
| C <sub>5</sub> H <sub>10</sub>                    | Cyclopentane                      | 287-92-3   | 70  | 8.28  | 0.013 |
| C <sub>6</sub> H <sub>10</sub>                    | 3-Methylcyclopentene              | 1120-62-3  | 82  | 11.56 | 0.004 |
| C <sub>6</sub> H <sub>10</sub>                    | 4-Methylcyclopentene              | 1759-81-5  | 82  | 11.89 | 0.001 |
| <i>Arenes</i>                                     |                                   |            |     |       |       |
| C <sub>6</sub> H <sub>6</sub>                     | Benzene                           | 71-43-2    | 78  | 11.97 | 0.009 |
| C <sub>7</sub> H <sub>8</sub>                     | Toluene                           | 108-88-3   | 92  | 16.32 | 0.024 |
| C <sub>7</sub> H <sub>7</sub> F                   | (Fluoromethyl)benzene             | 350-50-5   | 110 | 19.92 | 0.001 |
| C <sub>8</sub> H <sub>10</sub>                    | Ethylbenzene                      | 100-41-4   | 106 | 20.30 | 0.014 |
| C <sub>8</sub> H <sub>10</sub>                    | p-Xylene                          | 106-42-3   | 106 | 20.57 | 0.057 |
| C <sub>8</sub> H <sub>10</sub>                    | o-Xylene                          | 95-47-6    | 106 | 20.67 | 0.004 |
| C <sub>8</sub> H <sub>10</sub>                    | m-Xylene                          | 108-38-3   | 106 | 20.85 | 0.003 |
| C <sub>8</sub> H <sub>8</sub>                     | Styrene                           | 100-42-5   | 104 | 21.25 | 0.004 |
| C <sub>8</sub> H <sub>9</sub> F                   | p-Fluoroethylbenzene              | 459-47-2   | 124 | 22.88 | 0.029 |
| C <sub>9</sub> H <sub>12</sub>                    | Propylbenzene                     | 103-65-1   | 120 | 24.08 | 0.020 |
| C <sub>10</sub> H <sub>12</sub>                   | 3-Butenylbenzene                  | 768-56-9   | 132 | 25.05 | 0.030 |
| C <sub>10</sub> H <sub>14</sub>                   | Butylbenzene                      | 104-51-8   | 134 | 27.81 | 0.021 |
| C <sub>11</sub> H <sub>16</sub>                   | Pentylbenzene                     | 538-68-1   | 148 | 31.17 | 0.025 |
| C <sub>12</sub> H <sub>18</sub>                   | (2-Methylpentyl)-benzene          | 39916-61-5 | 162 | 31.56 | 0.020 |
| C <sub>12</sub> H <sub>18</sub>                   | Hexylbenzene                      | 1077-16-3  | 162 | 34.37 | 0.030 |
| C <sub>13</sub> H <sub>20</sub>                   | Heptylbenzene                     | 1078-71-3  | 176 | 38.59 | 0.035 |
| C <sub>14</sub> H <sub>22</sub>                   | 1-(1-Ethylpropyl)-4-propylbenzene | 54789-16-1 | 190 | 43.05 | 0.032 |
| C <sub>14</sub> H <sub>22</sub>                   | Octylbenzene                      | 2189-60-8  | 190 | 44.95 | 0.029 |
| C <sub>15</sub> H <sub>24</sub>                   | (2-Methyloctyl)-benzene           | 49826-80-4 | 204 | 53.35 | 0.073 |
| C <sub>15</sub> H <sub>24</sub>                   | Nonylbenzene                      | 1081-77-2  | 204 | 54.90 | 0.070 |
| C <sub>16</sub> H <sub>26</sub>                   | Decylbenzene (1/2)                | x          | 218 | 69.60 | 0.069 |
| C <sub>16</sub> H <sub>26</sub>                   | Decylbenzene (2/2)                | 104-72-3   | 218 | 70.79 | 0.047 |
| <i>PAH (Polycyclic aromatic hydrocarbons)</i>     |                                   |            |     |       |       |
| C <sub>10</sub> H <sub>8</sub>                    | Naphthalene                       | 91-20-3    | 128 | 31.36 | 0.004 |
| C <sub>14</sub> H <sub>10</sub>                   | Phenanthrene                      | 85-01-8    | 178 | 78.41 | 0.005 |
| C <sub>14</sub> H <sub>10</sub>                   | Anthracene                        | 120-12-7   | 178 | 79.96 | 0.003 |
| <b>Oxygenated hydrocarbons</b>                    |                                   |            |     |       |       |
| <i>Alcohols</i>                                   |                                   |            |     |       |       |
| CH <sub>4</sub> O                                 | Methanol                          | 67-56-1    | 32  | 4.86  | 0.053 |

|                                                |                                |            |     |        |       |
|------------------------------------------------|--------------------------------|------------|-----|--------|-------|
| C <sub>2</sub> H <sub>6</sub> O                | Ethanol                        | 64-17-5    | 46  | 6.10   | 0.120 |
| C <sub>3</sub> H <sub>8</sub> O                | Isopropyl Alcohol              | 67-63-0    | 60  | 7.81   | 0.006 |
| C <sub>4</sub> H <sub>10</sub> O               | 1-Butanol                      | 71-36-3    | 74  | 12.51  | 0.058 |
| C <sub>6</sub> H <sub>12</sub> O               | (E)-2-Hexen-1-ol               | 928-95-0   | 100 | 19.63  | 0.032 |
| C <sub>6</sub> H <sub>6</sub> O                | Phenol                         | 108-95-2   | 94  | 24.08  | 0.029 |
| C <sub>7</sub> H <sub>8</sub> O                | 2-Methylphenol                 | 95-48-7    | 108 | 25.43  | 0.002 |
| C <sub>6</sub> H <sub>12</sub> O <sub>2</sub>  | Tetrahydro-2H-pyran-2-methanol | 100-72-1   | 116 | 26.70  | 0.006 |
| C <sub>7</sub> H <sub>8</sub> O                | 3-Methylphenol                 | 108-39-4   | 108 | 26.71  | 0.004 |
| C <sub>7</sub> H <sub>8</sub> O                | 4-Methylphenol                 | 106-44-5   | 108 | 27.56  | 0.006 |
| C <sub>10</sub> H <sub>20</sub> O              | (E)-2-Decen-1-ol               | 18409-18-2 | 156 | 34.07  | 0.034 |
| C <sub>14</sub> H <sub>30</sub> O              | 3-Tetradecanol                 | 1653-32-3  | 214 | 52.41  | 0.010 |
| <i>Ethers and esters</i>                       |                                |            |     |        |       |
| C <sub>5</sub> H <sub>8</sub> O <sub>2</sub>   | Methyl methacrylate            | 80-62-6    | 100 | 13.92  | 0.035 |
| C <sub>4</sub> H <sub>6</sub> O <sub>2</sub>   | Butyrolactone                  | 96-48-0    | 86  | 20.60  | 0.005 |
| C <sub>6</sub> H <sub>10</sub> O <sub>2</sub>  | γ-Hexalactone                  | 695-06-7   | 114 | 27.00  | 0.004 |
| C <sub>7</sub> H <sub>12</sub> O <sub>2</sub>  | γ-Heptalactone                 | 105-21-5   | 128 | 30.51  | 0.013 |
| C <sub>8</sub> H <sub>14</sub> O <sub>2</sub>  | γ-Octalactone                  | 104-50-7   | 142 | 33.84  | 0.006 |
| C <sub>9</sub> H <sub>16</sub> O <sub>2</sub>  | γ-Nonalactone                  | 104-61-0   | 156 | 35.51  | 0.015 |
| C <sub>10</sub> H <sub>18</sub> O <sub>2</sub> | γ-Decalactone                  | 706-14-9   | 170 | 43.90  | 0.009 |
| C <sub>11</sub> H <sub>20</sub> O <sub>2</sub> | γ-Undecalactone                | 104-67-6   | 184 | 51.65  | 0.010 |
| C <sub>12</sub> H <sub>14</sub> O <sub>4</sub> | Diethyl Phthalate              | 84-66-2    | 222 | 52.73  | 0.004 |
| C <sub>12</sub> H <sub>20</sub> O <sub>2</sub> | γ-6-(Z)-Dodecenolactone        | 18679-18-0 | 196 | 66.72  | 0.018 |
| C <sub>12</sub> H <sub>22</sub> O <sub>2</sub> | γ-Dodecalactone                | 2305-05-7  | 198 | 68.05  | 0.011 |
| C <sub>12</sub> H <sub>22</sub> O <sub>2</sub> | 10-Methylundecan-5-olide       | (370407)   | 198 | 73.85  | 0.019 |
| C <sub>12</sub> H <sub>22</sub> O <sub>2</sub> | δ-Dodecalactone                | 713-95-1   | 198 | 75.12  | 0.004 |
| C <sub>13</sub> H <sub>24</sub> O <sub>2</sub> | γ-Tridecalactone               | x          | 212 | 90.96  | 0.016 |
| C <sub>14</sub> H <sub>26</sub> O <sub>2</sub> | γ-Tetradecalactone             | x          | 226 | 129.48 | 0.181 |
| <i>Aldehydes</i>                               |                                |            |     |        |       |
| C <sub>2</sub> H <sub>4</sub> O                | Acetaldehyde                   | 75-07-0    | 44  | 5.20   | 0.102 |
| C <sub>3</sub> H <sub>4</sub> O                | 2-Propenal                     | 107-02-8   | 56  | 7.09   | 0.009 |
| C <sub>3</sub> H <sub>6</sub> O                | n-Propanal                     | 123-38-6   | 58  | 7.34   | 0.027 |
| C <sub>4</sub> H <sub>6</sub> O                | 2-Methyl-2-propenal            | 78-85-3    | 70  | 9.36   | 0.005 |
| C <sub>4</sub> H <sub>8</sub> O                | 2-Methylpropanal               | 78-84-2    | 72  | 9.43   | 0.004 |
| C <sub>4</sub> H <sub>8</sub> O                | n-Butanal                      | 123-72-8   | 72  | 10.18  | 0.008 |
| C <sub>5</sub> H <sub>10</sub> O               | 3-Methylbutanal                | 590-86-3   | 86  | 13.24  | 0.001 |
| C <sub>5</sub> H <sub>10</sub> O               | n-Pentanal                     | 110-62-3   | 86  | 14.19  | 0.015 |
| C <sub>5</sub> H <sub>8</sub> O                | 3-Methyl-2-butenal             | 107-86-8   | 84  | 16.75  | 0.003 |
| C <sub>5</sub> H <sub>4</sub> O <sub>2</sub>   | Furfural                       | 98-01-1    | 96  | 16.96  | 0.002 |
| C <sub>5</sub> H <sub>4</sub> O <sub>2</sub>   | 3-Furaldehyde                  | 498-60-2   | 96  | 17.77  | 0.020 |
| C <sub>6</sub> H <sub>12</sub> O               | n-Hexanal                      | 66-25-1    | 100 | 18.44  | 0.047 |
| C <sub>7</sub> H <sub>14</sub> O               | n-Heptanal                     | 111-71-7   | 114 | 22.50  | 0.031 |
| C <sub>7</sub> H <sub>6</sub> O                | Benzaldehyde                   | 100-52-7   | 106 | 23.50  | 0.053 |

|                                                |                                        |            |     |        |       |
|------------------------------------------------|----------------------------------------|------------|-----|--------|-------|
| C <sub>8</sub> H <sub>16</sub> O               | 2-Ethylhexanal                         | 123-05-7   | 128 | 24.91  | 0.009 |
| C <sub>8</sub> H <sub>16</sub> O               | n-Octanal                              | 124-13-0   | 128 | 26.25  | 0.031 |
| C <sub>6</sub> H <sub>4</sub> O <sub>3</sub>   | 2,5-Furandicarboxaldehyde              | 823-82-5   | 124 | 27.33  | 0.013 |
| C <sub>7</sub> H <sub>12</sub> O               | 2-Ethyl-4-pentenal                     | 5204-80-8  | 112 | 29.18  | 0.092 |
| C <sub>9</sub> H <sub>18</sub> O               | n-Nonanal                              | 124-19-6   | 142 | 29.69  | 0.047 |
| C <sub>10</sub> H <sub>20</sub> O              | n-Decanal                              | 112-31-2   | 156 | 32.89  | 0.056 |
| C <sub>12</sub> H <sub>24</sub> O              | 2-Methylundecanal                      | 110-41-8   | 184 | 38.84  | 0.004 |
| C <sub>13</sub> H <sub>26</sub> O              | n-Tridecanal                           | 10486-19-8 | 198 | 47.68  | 0.105 |
| C <sub>14</sub> H <sub>28</sub> O              | n-Tetradecanal                         | 124-25-4   | 212 | 60.43  | 0.062 |
| C <sub>15</sub> H <sub>30</sub> O              | 13-Methyltetradecanal                  | 75853-51-9 | 226 | 80.65  | 0.107 |
| C <sub>15</sub> H <sub>30</sub> O              | n-Pentadecanal                         | 2765-11-9  | 226 | 81.61  | 0.104 |
| C <sub>16</sub> H <sub>32</sub> O              | n-Hexadecanal                          | 629-80-1   | 240 | 112.92 | 0.126 |
| <i>Ketones</i>                                 |                                        |            |     |        |       |
| C <sub>3</sub> H <sub>6</sub> O                | 2-Propanone                            | 67-64-1    | 58  | 7.39   | 0.018 |
| C <sub>4</sub> H <sub>6</sub> O                | 2-Butenone                             | 78-94-4    | 70  | 10.01  | 0.002 |
| C <sub>4</sub> H <sub>6</sub> O <sub>2</sub>   | 2,3-Butanedione                        | 431-03-8   | 86  | 10.26  | 0.002 |
| C <sub>4</sub> H <sub>8</sub> O                | 2-Butanone                             | 78-93-3    | 72  | 10.36  | 0.005 |
| C <sub>5</sub> H <sub>10</sub> O               | 2-Pentanone                            | 107-87-9   | 86  | 13.99  | 0.015 |
| C <sub>5</sub> H <sub>8</sub> O                | Cyclopentanone                         | 120-92-3   | 84  | 16.44  | 0.021 |
| C <sub>6</sub> H <sub>12</sub> O               | 2-Hexanone                             | 591-78-6   | 100 | 18.22  | 0.013 |
| C <sub>7</sub> H <sub>14</sub> O               | 2-Heptanone                            | 110-43-0   | 114 | 22.23  | 0.030 |
| C <sub>8</sub> H <sub>16</sub> O               | 2-Octanone                             | 111-13-7   | 128 | 26.96  | 0.016 |
| C <sub>9</sub> H <sub>18</sub> O               | 2-Nonanone                             | 821-55-6   | 142 | 29.39  | 0.023 |
| C <sub>10</sub> H <sub>20</sub> O              | 2-Decanone                             | 693-54-9   | 156 | 32.57  | 0.015 |
| C <sub>8</sub> H <sub>4</sub> O <sub>3</sub>   | 1,3-Isobenzofurandione                 | 85-44-9    | 148 | 32.17  | 0.181 |
| C <sub>11</sub> H <sub>22</sub> O              | 2-Undecanone                           | 53452-70-3 | 170 | 35.92  | 0.017 |
| C <sub>12</sub> H <sub>24</sub> O              | 2-Dodecanone                           | 6175-49-1  | 184 | 40.73  | 0.017 |
| C <sub>13</sub> H <sub>26</sub> O              | 3-Tridecanone                          | 1534-26-5  | 198 | 46.60  | 0.073 |
| C <sub>13</sub> H <sub>26</sub> O              | 2-Tridecanone                          | 593-08-8   | 198 | 48.21  | 0.048 |
| C <sub>14</sub> H <sub>28</sub> O              | 2-Tetradecanone                        | 2345-27-9  | 212 | 58.61  | 0.045 |
| C <sub>13</sub> H <sub>16</sub> O <sub>2</sub> | (1-Hydroxycyclohexyl) phenyl methanone | 947-19-3   | 204 | 72.57  | 0.016 |
| C <sub>15</sub> H <sub>30</sub> O              | 3-Methyl-2-tetradecanone               | x          | 226 | 77.56  | 0.157 |
| C <sub>15</sub> H <sub>30</sub> O              | 2-Pentadecanone                        | 2345-28-0  | 226 | 78.70  | 0.089 |
| C <sub>16</sub> H <sub>32</sub> O              | 2-Hexadecanone                         | 18787-63-8 | 240 | 108.41 | 0.108 |
| <i>Carboxylic acids</i>                        |                                        |            |     |        |       |
| CH <sub>2</sub> O <sub>2</sub>                 | Formic acid                            | 64-18-6    | 46  | 6.11   | 0.158 |
| C <sub>2</sub> H <sub>4</sub> O <sub>2</sub>   | Acetic acid                            | 64-19-7    | 60  | 10.91  | 0.288 |
| C <sub>3</sub> H <sub>6</sub> O <sub>2</sub>   | n-Propanoic acid                       | 79-09-4    | 74  | 14.66  | 0.012 |
| C <sub>4</sub> H <sub>8</sub> O <sub>2</sub>   | n-Butanoic acid                        | 107-92-6   | 88  | 18.29  | 0.191 |
| C <sub>5</sub> H <sub>10</sub> O <sub>2</sub>  | 3-Methylbutanoic acid                  | 503-74-2   | 102 | 21.23  | 0.024 |
| C <sub>5</sub> H <sub>10</sub> O <sub>2</sub>  | n-Pentanoic acid                       | 109-52-4   | 102 | 22.18  | 0.072 |
| C <sub>6</sub> H <sub>12</sub> O <sub>2</sub>  | n-Hexanoic acid                        | 142-62-1   | 116 | 25.70  | 0.187 |
| C <sub>7</sub> H <sub>14</sub> O <sub>2</sub>  | 3-Methylhexanoic acid                  | 3780-58-3  | 130 | 28.09  | 0.158 |

|                                                |                                     |            |     |        |        |
|------------------------------------------------|-------------------------------------|------------|-----|--------|--------|
| C <sub>7</sub> H <sub>14</sub> O <sub>2</sub>  | n-Heptanoic acid                    | 111-14-8   | 130 | 29.04  | 0.086  |
| C <sub>8</sub> H <sub>16</sub> O <sub>2</sub>  | 3-Methylheptanoic acid              | 59614-85-6 | 144 | 32.12  | 0.145  |
| C <sub>8</sub> H <sub>16</sub> O <sub>2</sub>  | n-Octanoic acid                     | 124-07-2   | 144 | 33.02  | 0.198  |
| C <sub>9</sub> H <sub>18</sub> O <sub>2</sub>  | n-Nonanoic acid                     | 112-05-0   | 158 | 35.24  | 0.118  |
| C <sub>10</sub> H <sub>20</sub> O <sub>2</sub> | 4-Methylnonanoic acid               | 45019-28-1 | 172 | 37.82  | 0.247  |
| C <sub>10</sub> H <sub>20</sub> O <sub>2</sub> | n-Decanoic acid                     | 334-48-5   | 172 | 39.62  | 1.962  |
| C <sub>8</sub> H <sub>14</sub> O <sub>3</sub>  | 3-Methoxycyclohexanecarboxylic acid | (453574)   | 158 | 41.97  | 0.017  |
| C <sub>11</sub> H <sub>22</sub> O <sub>2</sub> | 3-Methyldecanoic acid               | 60308-82-9 | 186 | 45.00  | 0.031  |
| C <sub>11</sub> H <sub>22</sub> O <sub>2</sub> | n-Undecanoic acid                   | 112-37-8   | 186 | 46.55  | 0.050  |
| C <sub>12</sub> H <sub>24</sub> O <sub>2</sub> | 3-Methylundecanoic acid             | 65781-38-6 | 200 | 56.13  | 0.088  |
| C <sub>12</sub> H <sub>24</sub> O <sub>2</sub> | n-Dodecanoic acid                   | 143-07-7   | 200 | 57.10  | 0.383  |
| C <sub>13</sub> H <sub>26</sub> O <sub>2</sub> | n-Tridecanoic acid                  | 638-53-9   | 214 | 74.63  | 0.106  |
| C <sub>14</sub> H <sub>28</sub> O <sub>2</sub> | n-Tetradecanoic acid                | 544-63-8   | 228 | 101.88 | 1.191  |
| <b>Heterocyclic compounds</b>                  |                                     |            |     |        |        |
| <i>Dioxanes</i>                                |                                     |            |     |        |        |
| C <sub>4</sub> H <sub>8</sub> O <sub>2</sub>   | 1,4-Dioxane                         | 123-91-1   | 88  | 13.22  | 0.001  |
| <i>Furans</i>                                  |                                     |            |     |        |        |
| C <sub>5</sub> H <sub>6</sub> O                | 2-Methylfuran                       | 534-22-5   | 82  | 9.83   | 0.018  |
| C <sub>5</sub> H <sub>6</sub> O                | 3-Methylfuran                       | 930-27-8   | 82  | 10.11  | <0.001 |
| C <sub>6</sub> H <sub>8</sub> O                | 2-Ethylfuran                        | 3208-16-0  | 96  | 13.44  | 0.001  |
| C <sub>6</sub> H <sub>6</sub> O                | 2-Vinylfuran                        | 1487-18-9  | 94  | 14.22  | 0.002  |
| C <sub>8</sub> H <sub>12</sub> O               | 2-Butylfuran                        | 4466-24-4  | 124 | 21.52  | 0.001  |
| C <sub>9</sub> H <sub>14</sub> O               | 2-Pentylfuran                       | 3777-69-3  | 138 | 25.30  | 0.002  |
| <b>Nitrogenated compounds</b>                  |                                     |            |     |        |        |
| N <sub>2</sub>                                 | Nitrogen                            | 7727-37-9  | 28  | 1.78   | 1.271  |
| H <sub>3</sub> N                               | Ammonia                             | 7664-41-7  | 17  | 2.95   | 0.054  |
| C <sub>2</sub> H <sub>3</sub> N                | Acetonitrile                        | 75-05-8    | 41  | 6.43   | 0.179  |
| C <sub>3</sub> H <sub>5</sub> N                | Propargylamine                      | 2450-71-7  | 55  | 9.19   | 0.003  |
| C <sub>3</sub> H <sub>8</sub> N <sub>2</sub>   | 1,2-Dimethyldiaziridine             | 6794-95-2  | 72  | 10.77  | 0.018  |
| C <sub>4</sub> H <sub>5</sub> N                | Pyrrole                             | 109-97-7   | 67  | 14.12  | 0.010  |
| C <sub>2</sub> H <sub>5</sub> NO               | Acetamide                           | 60-35-5    | 59  | 16.10  | 0.029  |
| C <sub>5</sub> H <sub>5</sub> N                | Pyridine                            | 110-86-1   | 79  | 15.22  | 0.008  |
| C <sub>3</sub> H <sub>5</sub> NO <sub>2</sub>  | 2-Oxo-propionamide                  | x          | 87  | 17.15  | 0.003  |
| C <sub>6</sub> H <sub>9</sub> N                | 2,3-Dimethyl-1H-pyrrole             | 600-28-2   | 95  | 17.99  | 0.002  |
| C <sub>6</sub> H <sub>7</sub> N                | 2-Methylpyridine                    | 109-06-8   | 93  | 18.45  | 0.003  |
| C <sub>6</sub> H <sub>7</sub> N                | 3-Methylpyridine                    | 108-99-6   | 93  | 20.17  | 0.002  |
| C <sub>6</sub> H <sub>7</sub> N                | 4-Methylpyridine                    | 108-89-4   | 93  | 20.37  | 0.001  |
| C <sub>4</sub> H <sub>9</sub> NO               | 2-Methylpropanamide                 | 563-83-7   | 87  | 23.41  | 0.006  |
| C <sub>5</sub> H <sub>11</sub> NO              | Pentanamide                         | 626-97-1   | 101 | 27.19  | 0.003  |
| C <sub>6</sub> H <sub>13</sub> NO              | Hexanamide                          | 628-02-4   | 115 | 30.63  | 0.013  |
| C <sub>7</sub> H <sub>15</sub> NO              | Heptamide                           | 628-62-6   | 129 | 33.82  | 0.003  |
| C <sub>5</sub> H <sub>7</sub> NO <sub>2</sub>  | 2,6-Piperidinedione                 | 1121-89-7  | 113 | 30.78  | 0.028  |

|                                                 |                                 |            |     |       |        |
|-------------------------------------------------|---------------------------------|------------|-----|-------|--------|
| C <sub>9</sub> H <sub>19</sub> NO               | Nonanamide                      | 1120-07-6  | 157 | 43.50 | 0.006  |
| C <sub>10</sub> H <sub>21</sub> NO              | Decanamide                      | 2319-29-1  | 171 | 50.96 | 0.018  |
| C <sub>11</sub> H <sub>21</sub> NO <sub>3</sub> | n-Propyl ester hexanoyl glycine | (453014)   | 215 | 71.52 | 0.006  |
| C <sub>12</sub> H <sub>25</sub> NO              | Dodecanamide                    | 1120-16-7  | 199 | 89.16 | 0.042  |
| <b>Sulfonated compounds</b>                     |                                 |            |     |       |        |
| H <sub>2</sub> S                                | Hydrogen sulfide                | 7783-06-4  | 34  | 2.73  | 0.359  |
| COS                                             | Carbonyl sulfide                | 463-58-1   | 60  | 3.30  | 0.004  |
| O <sub>2</sub> S                                | Sulfur dioxide                  | 7446-09-5  | 64  | 4.58  | 3.284  |
| CH <sub>4</sub> S                               | Methanethiol                    | 74-93-1    | 48  | 5.35  | 0.069  |
| CS <sub>2</sub>                                 | Carbon disulfide                | 75-15-0    | 76  | 7.68  | 0.087  |
| C <sub>4</sub> H <sub>4</sub> S                 | Thiophene                       | 110-02-1   | 84  | 11.76 | 0.004  |
| C <sub>2</sub> H <sub>6</sub> S <sub>2</sub>    | Dimethyl disulfide              | 624-92-0   | 94  | 14.74 | 0.006  |
| C <sub>5</sub> H <sub>6</sub> S                 | 2-Methylthiophene               | 554-14-3   | 98  | 15.84 | 0.008  |
| C <sub>5</sub> H <sub>6</sub> S                 | 3-Methylthiophene               | 616-44-4   | 98  | 16.17 | 0.011  |
| C <sub>6</sub> H <sub>8</sub> S                 | 2-Ethylthiophene                | 872-55-9   | 112 | 20.87 | 0.002  |
| C <sub>10</sub> H <sub>16</sub> S               | 2-Hexylthiophene                | 18794-77-9 | 168 | 34.19 | 0.014  |
| <b>Inorganic compounds</b>                      |                                 |            |     |       |        |
| <i>Oxides</i>                                   |                                 |            |     |       |        |
| CO <sub>2</sub>                                 | Carbon dioxide                  | 124-38-9   | 44  | 1.88  | 10.034 |
| H <sub>2</sub> O                                | Water                           | 7732-18-5  | 18  | 3.18  | 73.454 |
| <i>Noble gases</i>                              |                                 |            |     |       |        |
| Ar                                              | Argon                           | 7440-37-1  | 40  | 1.67  | 0.008  |

Note: <sup>1</sup>CAS/(NIST) – unique numerical identifier of chemical compounds included in the register Chemical Abstracts Service (<https://www.cas.org>) or NIST number (a unique number given to each spectrum in the NIST archive); <sup>2</sup>MW – nominal mass; <sup>3</sup>RT – retention time; <sup>4</sup>A – normalized area (the area ratio of the individual gas mixture components to the sum of the areas of all the components in the chromatogram).
