# Supplementary material
Source: MDPI journal article supplement (https://www.mdpi.com/2075-163X/11/10/1090)
Supplement: s1 [file s1]

Table S8. Results of GC–MS analysis of volatiles extracted by mechanical shock crushing from quartz (Blagodatnoye deposit, Yenisei ridge).

| Formula                                    | Name                  | <sup>1</sup> CAS | <sup>2</sup> MW | Quartz 86/241.4      |                   |
|--------------------------------------------|-----------------------|------------------|-----------------|----------------------|-------------------|
|                                            |                       |                  |                 | <sup>3</sup> RT, min | <sup>4</sup> A, % |
| Aliphatic hydrocarbons                     |                       |                  |                 |                      |                   |
| Paraffins                                  |                       |                  |                 |                      |                   |
| CH4                                        | Methane               | 74-82-8          | 16              | 1.72                 | 3.914             |
| C2H6                                       | Ethane                | 74-84-0          | 30              | 2.48                 | 0.045             |
| C4H10                                      | n-Butane              | 106-97-8         | 58              | 6.16                 | 0.012             |
| C5H12                                      | n-Pentane             | 109-66-0         | 72              | 8.61                 | 0.060             |
| C6H14                                      | n-Hexane              | 110-54-3         | 86              | 12.07                | 0.011             |
| C7H16                                      | n-Heptane             | 142-82-5         | 100             | 16.12                | 0.010             |
| C8H18                                      | n-Octane              | 111-65-9         | 114             | 20.20                | 0.013             |
| C9H20                                      | n-Nonane              | 111-84-2         | 128             | 24.10                | 0.016             |
| C10H22                                     | n-Decane              | 124-18-5         | 142             | 27.68                | 0.016             |
| C11H24                                     | n-Undecane            | 1120-21-4        | 156             | 31.01                | 0.012             |
| C12H26                                     | n-Dodecane            | 112-40-3         | 170             | 34.12                | 0.009             |
| C13H28                                     | n-Tridecane           | 629-50-5         | 184             | 38.15                | 0.014             |
| C14H30                                     | n-Tetradecane         | 629-59-4         | 198             | 44.25                | 0.014             |
| C15H32                                     | n-Pentadecane         | 629-62-9         | 212             | 53.81                | 0.016             |
| C17H36                                     | n-Heptadecane         | 629-78-7         | 240             | 109.86               | 0.737             |
| Olefins                                    |                       |                  |                 |                      |                   |
| C2H4                                       | Ethylene              | 74-85-1          | 28              | 2.18                 | 0.006             |
| C4H8                                       | 2-Methyl-1-propene    | 115-11-7         | 56              | 5.95                 | 0.011             |
| C5H10                                      | 1-Pentene             | 109-67-1         | 70              | 8.31                 | 0.001             |
| C5H8                                       | 1,3-Pentadiene        | 1574-41-0        | 68              | 8.58                 | 0.007             |
| C5H8                                       | (E)-1,3-Pentadiene    | 2004-70-8        | 68              | 8.79                 | <0.001            |
| C5H8                                       | (Z)-1,3-Pentadiene    | 1574-41-0        | 68              | 8.86                 | <0.001            |
| C6H12                                      | 1-Hexene              | 592-41-6         | 84              | 11.72                | 0.010             |
| C7H14                                      | 1-Heptene             | 592-76-7         | 98              | 15.75                | 0.058             |
| C8H16                                      | 1-Octene              | 111-66-0         | 112             | 19.87                | 0.005             |
| C9H18                                      | 1-Nonene              | 124-11-8         | 126             | 23.81                | 0.005             |
| C10H20                                     | 1-Decene              | 872-05-9         | 140             | 27.44                | 0.006             |
| C11H22                                     | 1-Undecene            | 821-95-4         | 154             | 30.51                | 0.005             |
| C13H26                                     | 1-Tridecene           | 2437-56-1        | 182             | 37.90                | 0.013             |
| C14H28                                     | 1-Tetradecene         | 1120-36-1        | 196             | 43.85                | 0.016             |
| C15H30                                     | 1-Pentadecene         | 13360-61-7       | 210             | 53.22                | 0.033             |
| Cyclic hydrocarbons                        |                       |                  |                 |                      |                   |
| Cycloalkanes (naphthenes) and cycloalkenes |                       |                  |                 |                      |                   |
| C5H8                                       | Cyclopentene          | 142-29-0         | 68              | 9.06                 | <0.001            |
| Arenes                                     |                       |                  |                 |                      |                   |
| C6H6                                       | Benzene               | 71-43-2          | 78              | 12.61                | 0.019             |
| C7H8                                       | Toluene               | 108-88-3         | 92              | 17.07                | 0.005             |
| C7H7F                                      | (Fluoromethyl)benzene | 350-50-5         | 110             | 20.75                | <0.001            |
| C8H10                                      | Ethylbenzene          | 100-41-4         | 106             | 21.13                | 0.004             |

|                                                |                                |           |     |        |        |
|------------------------------------------------|--------------------------------|-----------|-----|--------|--------|
| C <sub>8</sub> H <sub>10</sub>                 | p-Xylene                       | 106-42-3  | 106 | 21.40  | 0.007  |
| C <sub>8</sub> H <sub>10</sub>                 | o-Xylene                       | 95-47-6   | 106 | 21.70  | 0.003  |
| C <sub>8</sub> H <sub>10</sub>                 | m-Xylene                       | 108-38-3  | 106 | 22.03  | 0.004  |
| C <sub>8</sub> H <sub>8</sub>                  | Styrene                        | 100-42-5  | 104 | 22.05  | 0.002  |
| C <sub>9</sub> H <sub>12</sub>                 | Propylbenzene                  | 103-65-1  | 120 | 24.96  | 0.009  |
| C <sub>10</sub> H <sub>14</sub>                | Butylbenzene                   | 104-51-8  | 134 | 28.73  | 0.029  |
| C <sub>11</sub> H <sub>16</sub>                | Pentylbenzene                  | 538-68-1  | 148 | 32.12  | 0.027  |
| C <sub>12</sub> H <sub>18</sub>                | Hexylbenzene                   | 1077-16-3 | 162 | 35.55  | 0.020  |
| C <sub>13</sub> H <sub>20</sub>                | Heptylbenzene                  | 1078-71-3 | 176 | 40.50  | 0.017  |
| C <sub>14</sub> H <sub>22</sub>                | Octylbenzene                   | 2189-60-8 | 190 | 48.08  | 0.018  |
| <b>Oxygenated hydrocarbons</b>                 |                                |           |     |        |        |
| <i>Alcohols</i>                                |                                |           |     |        |        |
| CH <sub>4</sub> O                              | Methanol                       | 67-56-1   | 32  | 4.61   | 0.221  |
| C <sub>2</sub> H <sub>6</sub> O                | Ethanol                        | 64-17-5   | 46  | 6.41   | 0.033  |
| C <sub>3</sub> H <sub>6</sub> O                | 2-Propen-1-ol                  | 107-18-6  | 58  | 8.86   | 0.005  |
| C <sub>4</sub> H <sub>10</sub> O               | 1-Butanol                      | 71-36-3   | 74  | 12.97  | 0.017  |
| C <sub>6</sub> H <sub>6</sub> O                | Phenol                         | 108-95-2  | 94  | 24.78  | 0.008  |
| C <sub>6</sub> H <sub>5</sub> FS               | 4-Fluorothiophenol             | 371-42-6  | 128 | 28.33  | 0.004  |
| <i>Ethers and esters</i>                       |                                |           |     |        |        |
| C <sub>5</sub> H <sub>8</sub> O <sub>2</sub>   | Methyl methacrylate            | 80-62-6   | 100 | 14.52  | 0.003  |
| C <sub>4</sub> H <sub>6</sub> O <sub>2</sub>   | Butyrolactone                  | 96-48-0   | 86  | 20.97  | 0.002  |
| C <sub>8</sub> H <sub>14</sub> O <sub>2</sub>  | γ-Octalactone                  | 104-50-7  | 142 | 34.62  | 0.008  |
| C <sub>9</sub> H <sub>16</sub> O <sub>2</sub>  | γ-Nonalactone                  | 104-61-0  | 156 | 39.15  | 0.004  |
| C <sub>10</sub> H <sub>18</sub> O <sub>2</sub> | γ-Decalactone                  | 706-14-9  | 170 | 46.06  | 0.014  |
| C <sub>12</sub> H <sub>22</sub> O <sub>2</sub> | γ-Dodecalactone                | 2305-05-7 | 198 | 74.12  | 0.034  |
| C <sub>12</sub> H <sub>14</sub> O <sub>4</sub> | Diethyl phthalate              | 84-66-2   | 222 | 71.26  | 0.445  |
| C <sub>16</sub> H <sub>22</sub> O <sub>4</sub> | Diisobutyl phthalate           | 84-69-5   | 278 | 113.75 | 0.213  |
| <i>Aldehydes</i>                               |                                |           |     |        |        |
| C <sub>2</sub> H <sub>4</sub> O                | Acetaldehyde                   | 75-07-0   | 44  | 5.30   | 0.107  |
| C <sub>3</sub> H <sub>4</sub> O                | 2-Propenal                     | 107-02-8  | 56  | 7.28   | 0.011  |
| C <sub>3</sub> H <sub>6</sub> O                | n-Propanal                     | 123-38-6  | 58  | 7.48   | 0.003  |
| C <sub>4</sub> H <sub>6</sub> O                | 2-Methyl-2-propenal            | 78-85-3   | 70  | 9.73   | 0.001  |
| C <sub>4</sub> H <sub>8</sub> O                | 2-Methylpropanal               | 78-84-2   | 72  | 9.78   | 0.001  |
| C <sub>4</sub> H <sub>8</sub> O                | n-Butanal                      | 123-72-8  | 72  | 10.56  | 0.001  |
| C <sub>5</sub> H <sub>8</sub> O                | 2-Methyl-2-butenal             | 1115-11-3 | 84  | 13.47  | <0.001 |
| C <sub>5</sub> H <sub>10</sub> O               | 3-Methylbutanal                | 590-86-3  | 86  | 13.76  | 0.005  |
| C <sub>5</sub> H <sub>10</sub> O               | n-Pentanal                     | 110-62-3  | 86  | 14.72  | 0.003  |
| C <sub>5</sub> H <sub>4</sub> O <sub>2</sub>   | Furfural                       | 98-01-1   | 96  | 17.50  | 0.001  |
| C <sub>6</sub> H <sub>10</sub> O               | 2-Methyl-2-pentenal            | 623-36-9  | 98  | 18.15  | <0.001 |
| C <sub>5</sub> H <sub>4</sub> O <sub>2</sub>   | 3-Furaldehyde                  | 498-60-2  | 96  | 18.37  | 0.014  |
| C <sub>6</sub> H <sub>12</sub> O               | n-Hexanal                      | 66-25-1   | 100 | 19.07  | 0.016  |
| C <sub>7</sub> H <sub>14</sub> O               | n-Heptanal                     | 111-71-7  | 114 | 23.18  | 0.011  |
| C <sub>6</sub> H <sub>6</sub> O <sub>2</sub>   | 5-Methyl-2-furancarboxaldehyde | 620-02-0  | 110 | 23.40  | 0.002  |
| C <sub>7</sub> H <sub>6</sub> O                | Benzaldehyde                   | 100-52-7  | 106 | 24.15  | 0.021  |

|                                                |                        |            |     |        |       |
|------------------------------------------------|------------------------|------------|-----|--------|-------|
| C <sub>8</sub> H <sub>16</sub> O               | 2-Ethylhexanal         | 123-05-7   | 128 | 25.66  | 0.005 |
| C <sub>8</sub> H <sub>16</sub> O               | n-Octanal              | 124-13-0   | 128 | 26.99  | 0.017 |
| C <sub>9</sub> H <sub>18</sub> O               | n-Nonanal              | 124-19-6   | 142 | 30.51  | 0.026 |
| C <sub>10</sub> H <sub>20</sub> O              | n-Decanal              | 112-31-2   | 156 | 33.74  | 0.033 |
| C <sub>11</sub> H <sub>22</sub> O              | n-Undecanal            | 112-44-7   | 170 | 37.72  | 0.016 |
| C <sub>12</sub> H <sub>24</sub> O              | n-Dodecanal            | 112-54-9   | 184 | 43.65  | 0.016 |
| C <sub>13</sub> H <sub>26</sub> O              | n-Tridecanal           | 10486-19-8 | 198 | 52.92  | 0.016 |
| C <sub>14</sub> H <sub>28</sub> O              | n-Tetradecanal         | 124-25-4   | 212 | 67.63  | 0.033 |
| C <sub>15</sub> H <sub>30</sub> O              | n-Pentadecanal         | 2765-11-9  | 226 | 91.67  | 0.067 |
| <i>Ketones</i>                                 |                        |            |     |        |       |
| C <sub>3</sub> H <sub>6</sub> O                | 2-Propanone            | 67-64-1    | 58  | 7.66   | 0.037 |
| C <sub>4</sub> H <sub>6</sub> O <sub>2</sub>   | 2,3-Butanedione        | 431-03-8   | 86  | 10.66  | 0.001 |
| C <sub>4</sub> H <sub>8</sub> O                | 2-Butanone             | 78-93-3    | 72  | 10.72  | 0.002 |
| C <sub>5</sub> H <sub>8</sub> O                | Cyclopentanone         | 120-92-3   | 84  | 16.95  | 0.003 |
| C <sub>6</sub> H <sub>12</sub> O               | 2-Hexanone             | 591-78-6   | 100 | 18.80  | 0.003 |
| C <sub>7</sub> H <sub>14</sub> O               | 2-Heptanone            | 110-43-0   | 114 | 22.90  | 0.005 |
| C <sub>8</sub> H <sub>16</sub> O               | 2-Octanone             | 111-13-7   | 128 | 25.90  | 0.005 |
| C <sub>9</sub> H <sub>18</sub> O               | 2-Nonanone             | 821-55-6   | 142 | 30.19  | 0.008 |
| C <sub>10</sub> H <sub>20</sub> O              | 2-Decanone             | 693-54-9   | 156 | 33.41  | 0.008 |
| C <sub>8</sub> H <sub>4</sub> O <sub>3</sub>   | 1,3-Isobenzofurandione | 85-44-9    | 148 | 36.04  | 0.058 |
| C <sub>11</sub> H <sub>22</sub> O              | 2-Undecanone           | 53452-70-3 | 170 | 37.19  | 0.020 |
| C <sub>12</sub> H <sub>24</sub> O              | 2-Dodecanone           | 6175-49-1  | 184 | 42.83  | 0.009 |
| C <sub>13</sub> H <sub>26</sub> O              | 2-Tridecanone          | 593-08-8   | 198 | 51.57  | 0.023 |
| C <sub>14</sub> H <sub>28</sub> O              | 2-Tetradecanone        | 2345-27-9  | 212 | 65.35  | 0.027 |
| C <sub>15</sub> H <sub>30</sub> O              | 2-Pentadecanone        | 2345-28-0  | 226 | 87.91  | 0.066 |
| <i>Carboxylic acids</i>                        |                        |            |     |        |       |
| C <sub>2</sub> H <sub>4</sub> O <sub>2</sub>   | Acetic acid            | 64-19-7    | 60  | 11.37  | 0.155 |
| C <sub>3</sub> H <sub>6</sub> O <sub>2</sub>   | n-Propanoic acid       | 79-09-4    | 74  | 15.39  | 0.004 |
| C <sub>4</sub> H <sub>8</sub> O <sub>2</sub>   | n-Butanoic acid        | 107-92-6   | 88  | 19.02  | 0.110 |
| C <sub>5</sub> H <sub>10</sub> O <sub>2</sub>  | 3-Methylbutanoic acid  | 503-74-2   | 102 | 22.15  | 0.010 |
| C <sub>5</sub> H <sub>10</sub> O <sub>2</sub>  | n-Pentanoic acid       | 109-52-4   | 102 | 23.06  | 0.019 |
| C <sub>6</sub> H <sub>12</sub> O <sub>2</sub>  | n-Hexanoic acid        | 142-62-1   | 116 | 26.55  | 0.119 |
| C <sub>7</sub> H <sub>14</sub> O <sub>2</sub>  | n-Heptanoic acid       | 111-14-8   | 130 | 30.01  | 0.023 |
| C <sub>8</sub> H <sub>16</sub> O <sub>2</sub>  | n-Octanoic acid        | 124-07-2   | 144 | 32.99  | 0.292 |
| C <sub>9</sub> H <sub>18</sub> O <sub>2</sub>  | n-Nonanoic acid        | 112-05-0   | 158 | 36.72  | 0.039 |
| C <sub>10</sub> H <sub>20</sub> O <sub>2</sub> | n-Decanoic acid        | 334-48-5   | 172 | 41.77  | 0.120 |
| C <sub>12</sub> H <sub>24</sub> O <sub>2</sub> | n-Dodecanoic acid      | 143-07-7   | 200 | 62.53  | 0.176 |
| C <sub>14</sub> H <sub>28</sub> O <sub>2</sub> | n-Tetradecanoic acid   | 544-63-8   | 228 | 118.55 | 0.102 |
| <b>Heterocyclic compounds</b>                  |                        |            |     |        |       |
| <i>Furans</i>                                  |                        |            |     |        |       |
| C <sub>5</sub> H <sub>6</sub> O                | 2-Methylfuran          | 534-22-5   | 82  | 10.33  | 0.001 |
| C <sub>6</sub> H <sub>8</sub> O                | 2-Ethylfuran           | 3208-16-0  | 96  | 15.05  | 0.001 |
| C <sub>7</sub> H <sub>10</sub> O               | 2-Propylfuran          | 4229-91-8  | 110 | 18.25  | 0.001 |
| C <sub>8</sub> H <sub>12</sub> O               | 2-Butylfuran           | 4466-24-4  | 124 | 22.33  | 0.002 |

|                                                |                             |            |     |       |        |
|------------------------------------------------|-----------------------------|------------|-----|-------|--------|
| C <sub>9</sub> H <sub>14</sub> O               | 2-Pentylfuran               | 3777-69-3  | 138 | 26.16 | 0.002  |
| <b>Nitrogenated compounds</b>                  |                             |            |     |       |        |
| N <sub>2</sub>                                 | Nitrogen                    | 7727-37-9  | 28  | 1.62  | 2.102  |
| C <sub>2</sub> H <sub>3</sub> N                | Acetonitrile                | 75-05-8    | 41  | 6.89  | 0.012  |
| C <sub>2</sub> H <sub>5</sub> NO               | Acetamide                   | 60-35-5    | 59  | 16.09 | 0.014  |
| C <sub>6</sub> H <sub>8</sub> N <sub>2</sub> O | 2-Methoxy-6-methyl-pyrazine | 2882-21-5  | 124 | 27.81 | 0.022  |
| C <sub>4</sub> H <sub>5</sub> NO <sub>2</sub>  | Succinimide                 | 123-56-8   | 99  | 28.89 | 0.008  |
| C <sub>7</sub> H <sub>15</sub> NO              | Heptanamide                 | 628-62-6   | 129 | 31.12 | 0.003  |
| C <sub>9</sub> H <sub>19</sub> NO              | Nonanamide                  | 1120-07-6  | 157 | 38.83 | 0.007  |
| C <sub>10</sub> H <sub>21</sub> NO             | Decanamide                  | 2319-29-1  | 171 | 55.74 | 0.008  |
| C <sub>13</sub> H <sub>27</sub> NO             | Tridecanamide               | 34778-57-9 | 213 | 98.60 | 0.014  |
| <b>Sulfonated compounds</b>                    |                             |            |     |       |        |
| H <sub>2</sub> S                               | Hydrogen sulfide            | 7783-06-4  | 34  | 2.88  | 0.001  |
| COS                                            | Carbonyl sulfide            | 463-58-1   | 60  | 3.53  | 0.004  |
| O <sub>2</sub> S                               | Sulfur dioxide              | 7446-09-5  | 64  | 4.46  | 0.161  |
| CH <sub>4</sub> S                              | Methanethiol                | 74-93-1    | 48  | 5.56  | 0.016  |
| CS <sub>2</sub>                                | Carbon disulfide            | 75-15-0    | 76  | 7.88  | 0.006  |
| C <sub>4</sub> H <sub>4</sub> S                | Thiophene                   | 110-02-1   | 84  | 12.36 | <0.001 |
| C <sub>2</sub> H <sub>6</sub> S <sub>2</sub>   | Dimethyl disulfide          | 624-92-0   | 94  | 15.44 | <0.001 |
| C <sub>6</sub> H <sub>5</sub> FS               | 4-Fluorothiophenol          | 371-42-6   | 128 | 28.33 | 0.004  |
| <b>Inorganic compounds</b>                     |                             |            |     |       |        |
| <i>Oxides</i>                                  |                             |            |     |       |        |
| CO <sub>2</sub>                                | Carbon dioxide              | 124-38-9   | 44  | 1.92  | 9.470  |
| H <sub>2</sub> O                               | Water                       | 7732-18-5  | 18  | 3.20  | 80.020 |
| <i>Noble gases</i>                             |                             |            |     |       |        |
| Ar                                             | Argon                       | 7440-37-1  | 40  | 1.58  | 0.002  |

Note: <sup>1</sup>CAS – unique numerical identifier of chemical compounds included in the register Chemical Abstracts Service (<https://www.cas.org>); <sup>2</sup>MW – nominal mass; <sup>3</sup>RT – retention time; <sup>4</sup>A – normalized area (the area ratio of the individual gas mixture components to the sum of the areas of all the components in the chromatogram).
