# Supplementary material
Source: MDPI journal article supplement (https://www.mdpi.com/2075-163X/11/10/1090)
Supplement: s1 [file s1]

Table S9. Results of GC–MS analysis of volatiles extracted by mechanical shock crushing from arsenopyrite (Blagodatnoye deposit, Yenisei ridge).

| Formula                | Name                | <sup>1</sup> CAS/(NIST) | <sup>2</sup> MW | Arsenopyrite 112/191.2 |                   |
|------------------------|---------------------|-------------------------|-----------------|------------------------|-------------------|
|                        |                     |                         |                 | <sup>3</sup> RT, min   | <sup>4</sup> A, % |
| Aliphatic hydrocarbons |                     |                         |                 |                        |                   |
| Paraffins              |                     |                         |                 |                        |                   |
| CH4                    | Methane             | 74-82-8                 | 16              | 1.72                   | 1.166             |
| C2H6                   | Ethane              | 74-84-0                 | 30              | 2.58                   | 0.005             |
| C4H10                  | n-Butane            | 106-97-8                | 58              | 6.16                   | 0.003             |
| C5H12                  | n-Pentane           | 109-66-0                | 72              | 8.63                   | 0.003             |
| C6H14                  | n-Hexane            | 110-54-3                | 86              | 12.06                  | 0.004             |
| C7H16                  | n-Heptane           | 142-82-5                | 100             | 16.09                  | 0.002             |
| C9H20                  | 2,6-Dimethylheptane | 1072-05-5               | 128             | 17.54                  | 0.002             |
| C8H16                  | 3-Methyleneheptane  | 1632-16-2               | 112             | 19.58                  | 0.009             |
| C8H18                  | n-Octane            | 111-65-9                | 114             | 20.18                  | 0.003             |
| C9H20                  | n-Nonane            | 111-84-2                | 128             | 24.06                  | 0.004             |
| C10H22                 | n-Decane            | 124-18-5                | 142             | 27.64                  | 0.004             |
| C11H24                 | n-Undecane          | 1120-21-4               | 156             | 30.96                  | 0.002             |
| C12H26                 | n-Dodecane          | 112-40-3                | 170             | 34.07                  | 0.002             |
| C13H28                 | n-Tridecane         | 629-50-5                | 184             | 38.07                  | 0.003             |
| C14H30                 | 3-Methyltridecane   | 6418-41-3               | 198             | 42.20                  | 0.047             |
| C14H30                 | n-Tetradecane       | 629-59-4                | 198             | 44.13                  | 0.004             |
| C15H32                 | n-Pentadecane       | 629-62-9                | 212             | 53.65                  | 0.005             |
| C16H34                 | n-Hexadecane        | 544-76-3                | 226             | 66.66                  | 0.050             |
| C17H36                 | n-Heptadecane       | 629-78-7                | 240             | 95.72                  | 0.010             |
| C18H38                 | 4-Methylheptadecane | 26429-11-8              | 254             | 106.19                 | 0.041             |
| Olefins                |                     |                         |                 |                        |                   |
| C2H4                   | Ethylene            | 74-85-1                 | 28              | 2.46                   | 0.005             |
| C4H8                   | 1-Butene            | 106-98-9                | 56              | 5.78                   | 0.002             |
| C4H8                   | 2-Methyl-1-propene  | 115-11-7                | 56              | 5.96                   | 0.008             |
| C5H10                  | 1-Pentene           | 109-67-1                | 70              | 8.19                   | 0.003             |
| C5H8                   | 1,3-Pentadiene      | 1574-41-0               | 68              | 8.49                   | 0.003             |
| C5H8                   | (E)-1,3-Pentadiene  | 2004-70-8               | 68              | 8.73                   | 0.001             |
| C5H8                   | (Z)-1,3-Pentadiene  | 1574-41-0               | 68              | 8.79                   | <0.001            |
| C6H12                  | 2-Methyl-2-pentene  | 625-27-4                | 84              | 11.04                  | 0.001             |
| C6H12                  | 1-Hexene            | 592-41-6                | 84              | 11.67                  | 0.003             |
| C6H12                  | 3-Methyl-2-pentene  | 922-61-2                | 84              | 11.77                  | 0.001             |
| C7H14                  | 1-Heptene           | 592-76-7                | 98              | 15.74                  | 0.001             |
| C8H16                  | 4-Methyl-3-heptene  | 4485-16-9               | 112             | 19.43                  | 0.002             |
| C8H16                  | 1-Octene            | 111-66-0                | 112             | 19.75                  | 0.007             |
| C8H16                  | (E)-4-Octene        | 14850-23-8              | 112             | 19.97                  | 0.007             |
| C8H16                  | 2-Octene            | 111-67-1                | 112             | 20.28                  | 0.003             |
| C9H18                  | 1-Nonene            | 124-11-8                | 126             | 23.78                  | 0.002             |
| C10H20                 | 1-Decene            | 872-05-9                | 140             | 27.44                  | 0.001             |

|                                                |                               |            |     |       |        |
|------------------------------------------------|-------------------------------|------------|-----|-------|--------|
| C <sub>11</sub> H <sub>22</sub>                | 1-Undecene                    | 821-95-4   | 154 | 30.77 | 0.001  |
| C <sub>12</sub> H <sub>24</sub>                | 1-Dodecene                    | 112-41-4   | 168 | 33.87 | 0.001  |
| C <sub>13</sub> H <sub>26</sub>                | 1-Tridecene                   | 2437-56-1  | 182 | 37.80 | 0.002  |
| C <sub>15</sub> H <sub>30</sub>                | 1-Pentadecene                 | 13360-61-7 | 210 | 52.94 | 0.009  |
| C <sub>16</sub> H <sub>32</sub>                | 1-Hexadecene                  | 629-73-2   | 224 | 65.15 | 0.010  |
| C <sub>17</sub> H <sub>34</sub>                | 1-Heptadecene                 | 6765-39-5  | 238 | 92.97 | 0.007  |
| <b>Cyclic hydrocarbons</b>                     |                               |            |     |       |        |
| <i>PAH (Polycyclic aromatic hydrocarbons)</i>  |                               |            |     |       |        |
| C <sub>10</sub> H <sub>8</sub>                 | Naphthalene                   | 91-20-3    | 128 | 32.29 | 0.003  |
| C <sub>11</sub> H <sub>10</sub>                | 1-Methylnaphthalene           | 90-12-0    | 142 | 36.10 | 0.001  |
| C <sub>11</sub> H <sub>10</sub>                | 2-Methylnaphthalene           | 91-57-6    | 142 | 36.64 | 0.002  |
| C <sub>14</sub> H <sub>10</sub>                | Phenanthrene                  | 85-01-8    | 178 | 88.92 | 0.002  |
| <i>Arenes</i>                                  |                               |            |     |       |        |
| C <sub>6</sub> H <sub>6</sub>                  | Benzene                       | 71-43-2    | 78  | 12.62 | 0.006  |
| C <sub>7</sub> H <sub>8</sub>                  | Toluene                       | 108-88-3   | 92  | 17.09 | 0.002  |
| C <sub>7</sub> H <sub>7</sub> F                | (Fluoromethyl)benzene         | 350-50-5   | 110 | 20.73 | <0.001 |
| C <sub>8</sub> H <sub>10</sub>                 | Ethylbenzene                  | 100-41-4   | 106 | 21.13 | 0.001  |
| C <sub>8</sub> H <sub>10</sub>                 | p-Xylene                      | 106-42-3   | 106 | 21.38 | 0.009  |
| C <sub>8</sub> H <sub>10</sub>                 | o-Xylene                      | 95-47-6    | 106 | 21.63 | 0.004  |
| C <sub>8</sub> H <sub>10</sub>                 | m-Xylene                      | 108-38-3   | 106 | 22.03 | 0.002  |
| C <sub>8</sub> H <sub>8</sub>                  | Styrene                       | 100-42-5   | 104 | 22.05 | 0.001  |
| C <sub>9</sub> H <sub>12</sub>                 | Propylbenzene                 | 103-65-1   | 120 | 24.95 | 0.001  |
| C <sub>10</sub> H <sub>14</sub>                | p-Cymene                      | 99-87-6    | 134 | 27.79 | 0.006  |
| C <sub>10</sub> H <sub>14</sub>                | o-Cymene                      | 527-84-4   | 134 | 28.71 | 0.001  |
| C <sub>10</sub> H <sub>14</sub>                | Butylbenzene                  | 104-51-8   | 134 | 28.71 | 0.003  |
| C <sub>11</sub> H <sub>16</sub>                | Pentylbenzene                 | 538-68-1   | 148 | 32.12 | 0.004  |
| C <sub>12</sub> H <sub>18</sub>                | Hexylbenzene                  | 1077-16-3  | 162 | 35.52 | 0.002  |
| <b>Oxygenated hydrocarbons</b>                 |                               |            |     |       |        |
| <i>Alcohols</i>                                |                               |            |     |       |        |
| CH <sub>4</sub> O                              | Methanol                      | 67-56-1    | 32  | 4.88  | 0.051  |
| C <sub>2</sub> H <sub>6</sub> O                | Ethanol                       | 64-17-5    | 46  | 6.51  | 0.007  |
| C <sub>3</sub> H <sub>8</sub> O                | 2-Propanol                    | 67-63-0    | 60  | 8.09  | 0.001  |
| C <sub>3</sub> H <sub>8</sub> O                | 1-Propanol                    | 71-23-8    | 60  | 9.13  | 0.001  |
| C <sub>4</sub> H <sub>10</sub> O               | 1-Butanol                     | 71-36-3    | 74  | 12.92 | 0.005  |
| C <sub>6</sub> H <sub>6</sub> O                | Phenol                        | 108-95-2   | 94  | 24.80 | 0.002  |
| C <sub>8</sub> H <sub>18</sub> O               | 2-Ethyl-1-hexanol             | 104-76-7   | 130 | 28.18 | 0.015  |
| <i>Ethers and esters</i>                       |                               |            |     |       |        |
| C <sub>5</sub> H <sub>8</sub> O <sub>2</sub>   | Methyl methacrylate           | 80-62-6    | 100 | 14.50 | 0.001  |
| C <sub>4</sub> H <sub>6</sub> O <sub>2</sub>   | Butyrolactone                 | 96-48-0    | 86  | 21.00 | <0.001 |
| C <sub>8</sub> H <sub>14</sub> O <sub>2</sub>  | γ-Octalactone                 | 104-50-7   | 142 | 34.59 | 0.001  |
| C <sub>9</sub> H <sub>16</sub> O <sub>2</sub>  | γ-Nonalactone                 | 104-61-0   | 156 | 39.13 | 0.002  |
| C <sub>10</sub> H <sub>18</sub> O <sub>2</sub> | γ-Decalactone                 | 706-14-9   | 170 | 45.94 | 0.002  |
| C <sub>12</sub> H <sub>22</sub> O <sub>2</sub> | γ-Dodecalactone               | 2305-05-7  | 198 | 74.05 | 0.002  |
| C <sub>13</sub> H <sub>16</sub> O <sub>2</sub> | Cyclohexyl ester benzoic acid | 2412-73-9  | 204 | 86.83 | 0.003  |
| C <sub>14</sub> H <sub>20</sub> O <sub>2</sub> | Heptyl ester benzoic          | 7155-12-6  | 220 | 95.07 | 0.014  |

|                                                |                                |            |     |        |        |
|------------------------------------------------|--------------------------------|------------|-----|--------|--------|
|                                                | acid                           |            |     |        |        |
| C <sub>15</sub> H <sub>22</sub> O <sub>2</sub> | Octyl ester benzoic acid       | 94-50-8    | 234 | 109.22 | 0.013  |
| C <sub>16</sub> H <sub>22</sub> O <sub>4</sub> | Diisobutyl phthalate           | 84-69-5    | 278 | 129.19 | 0.067  |
| <i>Aldehydes</i>                               |                                |            |     |        |        |
| C <sub>2</sub> H <sub>4</sub> O                | Acetaldehyde                   | 75-07-0    | 44  | 4.91   | 0.034  |
| C <sub>3</sub> H <sub>4</sub> O                | 2-Propenal                     | 107-02-8   | 56  | 7.19   | 0.001  |
| C <sub>3</sub> H <sub>6</sub> O                | n-Propanal                     | 123-38-6   | 58  | 7.59   | 0.005  |
| C <sub>4</sub> H <sub>6</sub> O                | 2-Methyl-2-propenal            | 78-85-3    | 70  | 9.71   | <0.001 |
| C <sub>4</sub> H <sub>8</sub> O                | 2-Methylpropanal               | 78-84-2    | 72  | 9.79   | 0.002  |
| C <sub>4</sub> H <sub>8</sub> O                | n-Butanal                      | 123-72-8   | 72  | 10.59  | 0.004  |
| C <sub>5</sub> H <sub>8</sub> O                | 2-Methyl-2-butenal             | 1115-11-3  | 84  | 13.49  | <0.001 |
| C <sub>5</sub> H <sub>10</sub> O               | 3-Methylbutanal                | 590-86-3   | 86  | 13.74  | 0.002  |
| C <sub>5</sub> H <sub>10</sub> O               | n-Pentanal                     | 110-62-3   | 86  | 14.72  | 0.001  |
| C <sub>5</sub> H <sub>8</sub> O                | 3-Methyl-2-butenal             | 107-86-8   | 84  | 17.22  | <0.001 |
| C <sub>5</sub> H <sub>4</sub> O <sub>2</sub>   | Furfural                       | 98-01-1    | 96  | 17.52  | <0.001 |
| C <sub>6</sub> H <sub>10</sub> O               | 2-Methyl-2-pentenal            | 623-36-9   | 98  | 18.17  | <0.001 |
| C <sub>5</sub> H <sub>4</sub> O <sub>2</sub>   | 3-Furaldehyde                  | 498-60-2   | 96  | 18.38  | 0.001  |
| C <sub>6</sub> H <sub>12</sub> O               | n-Hexanal                      | 66-25-1    | 100 | 19.05  | 0.004  |
| C <sub>7</sub> H <sub>14</sub> O               | n-Heptanal                     | 111-71-7   | 114 | 23.18  | 0.002  |
| C <sub>6</sub> H <sub>6</sub> O <sub>2</sub>   | 5-Methyl-2-furancarboxaldehyde | 620-02-0   | 110 | 23.45  | <0.001 |
| C <sub>7</sub> H <sub>6</sub> O                | Benzaldehyde                   | 100-52-7   | 106 | 24.16  | 0.009  |
| C <sub>8</sub> H <sub>16</sub> O               | 2-Ethylhexanal                 | 123-05-7   | 128 | 25.65  | 0.016  |
| C <sub>8</sub> H <sub>16</sub> O               | n-Octanal                      | 124-13-0   | 128 | 26.99  | 0.004  |
| C <sub>9</sub> H <sub>18</sub> O               | n-Nonanal                      | 124-19-6   | 142 | 30.47  | 0.005  |
| C <sub>10</sub> H <sub>20</sub> O              | n-Decanal                      | 112-31-2   | 156 | 33.72  | 0.005  |
| C <sub>11</sub> H <sub>22</sub> O              | n-Undecanal                    | 112-44-7   | 170 | 37.69  | 0.004  |
| C <sub>12</sub> H <sub>24</sub> O              | n-Dodecanal                    | 112-54-9   | 184 | 43.53  | 0.004  |
| C <sub>15</sub> H <sub>30</sub> O              | n-Pentadecanal                 | 2765-11-9  | 226 | 90.89  | 0.011  |
| <i>Ketones</i>                                 |                                |            |     |        |        |
| C <sub>3</sub> H <sub>6</sub> O                | 2-Propanone                    | 67-64-1    | 58  | 7.68   | 0.007  |
| C <sub>4</sub> H <sub>6</sub> O <sub>2</sub>   | 2,3-Butanedione                | 431-03-8   | 86  | 10.66  | <0.001 |
| C <sub>4</sub> H <sub>8</sub> O                | 2-Butanone                     | 78-93-3    | 72  | 10.74  | 0.003  |
| C <sub>5</sub> H <sub>8</sub> O                | Cyclopentanone                 | 120-92-3   | 84  | 16.99  | <0.001 |
| C <sub>6</sub> H <sub>12</sub> O               | 2-Hexanone                     | 591-78-6   | 100 | 18.78  | 0.001  |
| C <sub>7</sub> H <sub>14</sub> O               | 2-Heptanone                    | 110-43-0   | 114 | 22.88  | 0.002  |
| C <sub>8</sub> H <sub>16</sub> O               | 2-Octanone                     | 111-13-7   | 128 | 25.68  | 0.003  |
| C <sub>9</sub> H <sub>18</sub> O               | 2-Nonanone                     | 821-55-6   | 142 | 30.16  | 0.001  |
| C <sub>10</sub> H <sub>20</sub> O              | 2-Decanone                     | 693-54-9   | 156 | 33.37  | 0.001  |
| C <sub>8</sub> H <sub>4</sub> O <sub>3</sub>   | 1,3-Isobenzofurandione         | 85-44-9    | 148 | 36.04  | 0.015  |
| C <sub>11</sub> H <sub>22</sub> O              | 2-Undecanone                   | 53452-70-3 | 170 | 37.17  | 0.002  |
| C <sub>13</sub> H <sub>26</sub> O              | 2-Tridecanone                  | 593-08-8   | 198 | 51.42  | 0.006  |
| C <sub>14</sub> H <sub>28</sub> O              | 2-Tetradecanone                | 2345-27-9  | 212 | 61.23  | 0.008  |
| C <sub>15</sub> H <sub>30</sub> O              | 2-Pentadecanone                | 2345-28-0  | 226 | 87.38  | 0.011  |
| <i>Carboxylic acids</i>                        |                                |            |     |        |        |

|                                                 |                                           |            |     |        |        |
|-------------------------------------------------|-------------------------------------------|------------|-----|--------|--------|
| C <sub>2</sub> H <sub>4</sub> O <sub>2</sub>    | Acetic acid                               | 64-19-7    | 60  | 11.39  | 0.023  |
| C <sub>3</sub> H <sub>6</sub> O <sub>2</sub>    | n-Propanoic acid                          | 79-09-4    | 74  | 15.37  | 0.001  |
| C <sub>4</sub> H <sub>8</sub> O <sub>2</sub>    | n-Butanoic acid                           | 107-92-6   | 88  | 19.03  | 0.014  |
| C <sub>5</sub> H <sub>10</sub> O <sub>2</sub>   | 3-Methylbutanoic acid                     | 503-74-2   | 102 | 22.07  | 0.001  |
| C <sub>5</sub> H <sub>10</sub> O <sub>2</sub>   | n-Pentanoic acid                          | 109-52-4   | 102 | 23.01  | 0.004  |
| C <sub>6</sub> H <sub>12</sub> O <sub>2</sub>   | n-Hexanoic acid                           | 142-62-1   | 116 | 26.53  | 0.015  |
| C <sub>7</sub> H <sub>14</sub> O <sub>2</sub>   | n-Heptanoic acid                          | 111-14-8   | 130 | 29.93  | 0.004  |
| C <sub>8</sub> H <sub>16</sub> O <sub>2</sub>   | n-Octanoic acid                           | 124-07-2   | 144 | 32.99  | 0.017  |
| C <sub>9</sub> H <sub>18</sub> O <sub>2</sub>   | n-Nonanoic acid                           | 112-05-0   | 158 | 36.50  | 0.012  |
| C <sub>10</sub> H <sub>20</sub> O <sub>2</sub>  | n-Decanoic acid                           | 334-48-5   | 172 | 41.75  | 0.016  |
| C <sub>11</sub> H <sub>22</sub> O <sub>2</sub>  | n-Undecanoic acid                         | 112-37-8   | 186 | 50.01  | 0.001  |
| C <sub>12</sub> H <sub>24</sub> O <sub>2</sub>  | n-Dodecanoic acid                         | 143-07-7   | 200 | 62.75  | 0.025  |
| C <sub>14</sub> H <sub>28</sub> O <sub>2</sub>  | n-Tetradecanoic acid                      | 544-63-8   | 228 | 118.95 | 0.031  |
| <b>Heterocyclic compounds</b>                   |                                           |            |     |        |        |
| <i>Furans</i>                                   |                                           |            |     |        |        |
| C <sub>5</sub> H <sub>6</sub> O                 | 2-Methylfuran                             | 534-22-5   | 82  | 10.36  | 0.001  |
| C <sub>6</sub> H <sub>8</sub> O                 | 2-Ethylfuran                              | 3208-16-0  | 96  | 14.17  | 0.001  |
| C <sub>8</sub> H <sub>12</sub> O                | 2-Butylfuran                              | 4466-24-4  | 124 | 22.31  | 0.001  |
| C <sub>9</sub> H <sub>14</sub> O                | 2-Pentylfuran                             | 3777-69-3  | 138 | 26.13  | 0.002  |
| <b>Nitrogenated compounds</b>                   |                                           |            |     |        |        |
| N <sub>2</sub>                                  | Nitrogen                                  | 7727-37-9  | 28  | 1.65   | 0.408  |
| H <sub>3</sub> N                                | Ammonia                                   | 7664-41-7  | 17  | 2.86   | 0.030  |
| C <sub>2</sub> H <sub>3</sub> N                 | Acetonitrile                              | 75-05-8    | 41  | 6.74   | 0.005  |
| C <sub>5</sub> H <sub>5</sub> N                 | Pyridine                                  | 110-86-1   | 79  | 15.60  | 0.001  |
| C <sub>2</sub> H <sub>5</sub> NO                | Acetamide                                 | 60-35-5    | 59  | 16.35  | 0.001  |
| C <sub>6</sub> H <sub>8</sub> N <sub>2</sub> O  | 2-Methoxy-6-methyl-pyrazine               | 2882-21-5  | 124 | 27.83  | 0.001  |
| C <sub>4</sub> H <sub>5</sub> NO <sub>2</sub>   | Succinimide                               | 123-56-8   | 99  | 28.93  | 0.001  |
| C <sub>7</sub> H <sub>15</sub> NO               | Heptanamide                               | 628-62-6   | 129 | 31.12  | <0.001 |
| C <sub>8</sub> H <sub>17</sub> NO               | N-hexylacetamide                          | 7501-79-3  | 143 | 34.44  | <0.001 |
| C <sub>9</sub> H <sub>19</sub> NO               | Nonanamide                                | 1120-07-6  | 157 | 38.82  | 0.001  |
| C <sub>10</sub> H <sub>21</sub> NO              | Decanamide                                | 2319-29-1  | 171 | 55.60  | 0.001  |
| C <sub>13</sub> H <sub>27</sub> NO <sub>2</sub> | Octyl ester N-methyl-N-propylarbamic acid | (437270)   | 229 | 68.54  | 0.009  |
| C <sub>13</sub> H <sub>27</sub> NO              | Tridecanamide                             | 34778-57-9 | 213 | 97.87  | 0.002  |
| <b>Sulfonated compounds</b>                     |                                           |            |     |        |        |
| H <sub>2</sub> S                                | Hydrogen sulfide                          | 7783-06-4  | 34  | 2.90   | 0.001  |
| O <sub>2</sub> S                                | Sulfur dioxide                            | 7446-09-5  | 64  | 4.36   | 0.026  |
| CS <sub>2</sub>                                 | Carbon disulfide                          | 75-15-0    | 76  | 7.69   | 0.001  |
| C <sub>4</sub> H <sub>4</sub> S                 | Thiophene                                 | 110-02-1   | 84  | 12.39  | <0.001 |
| C <sub>2</sub> H <sub>6</sub> S <sub>2</sub>    | Dimethyl disulfide                        | 624-92-0   | 94  | 15.42  | <0.001 |
| C <sub>5</sub> H <sub>6</sub> S                 | 2-Methylthiophene                         | 554-14-3   | 98  | 16.57  | <0.001 |
| C <sub>5</sub> H <sub>6</sub> S                 | 3-Methylthiophene                         | 616-44-4   | 98  | 16.92  | 0.001  |
| <b>Inorganic compounds</b>                      |                                           |            |     |        |        |
| <i>Oxides</i>                                   |                                           |            |     |        |        |

|                          |                |           |    |        |        |
|--------------------------|----------------|-----------|----|--------|--------|
| CO <sub>2</sub>          | Carbon dioxide | 124-38-9  | 44 | 1.92   | 1.047  |
| H <sub>2</sub> O         | Water          | 7732-18-5 | 18 | 3.11   | 96.402 |
| <i>Noble gases</i>       |                |           |    |        |        |
| Ar                       | Argon          | 7440-37-1 | 40 | 1.65   | 0.001  |
| <b>Unknown compounds</b> |                |           |    |        |        |
|                          | Unknown        |           |    | 101.81 | 0.028  |
|                          | Unknown        |           |    | 118.35 | 0.007  |

Note: <sup>1</sup>CAS/(NIST) – unique numerical identifier of chemical compounds included in the register Chemical Abstracts Service (<https://www.cas.org>) or NIST number (a unique number given to each spectrum in the NIST archive); <sup>2</sup>MW – nominal mass; <sup>3</sup>RT – retention time; <sup>4</sup>A – normalized area (the area ratio of the individual gas mixture components to the sum of the areas of all the components in the chromatogram).
