# Supplementary material
Source: MDPI journal article supplement (https://www.mdpi.com/2075-163X/11/10/1090)
Supplement: s1 [file s1]

Table S5. Results of GC–MS analysis of volatiles extracted by mechanical shock crushing from quartz (Blagodatnoye deposit, Yenisei ridge).

| Formula                | Name                        | <sup>1</sup> CAS/(NIST) | <sup>2</sup> MW | Quartz 86-107.7         |                   |
|------------------------|-----------------------------|-------------------------|-----------------|-------------------------|-------------------|
|                        |                             |                         |                 | <sup>3</sup> RT,<br>min | <sup>4</sup> A, % |
| Aliphatic hydrocarbons |                             |                         |                 |                         |                   |
| Paraffins              |                             |                         |                 |                         |                   |
| CH4                    | Methane                     | 74-82-8                 | 16              | 1.85                    | 0.066             |
| C8H18                  | 2,2-Dimethylhexane          | 590-73-8                | 114             | 19.40                   | 0.030             |
| C8H18                  | n-Octane                    | 111-65-9                | 114             | 20.17                   | 0.021             |
| C9H20                  | n-Nonane                    | 111-84-2                | 128             | 24.08                   | 0.011             |
| C10H22                 | n-Decane                    | 124-18-5                | 142             | 27.66                   | 0.025             |
| C13H28                 | 2,4,6-Trimethyldecane       | 62108-27-4              | 184             | 30.99                   | 0.023             |
| C12H26                 | n-Dodecane                  | 112-40-3                | 170             | 34.44                   | 0.361             |
| C13H28                 | n-Tridecane                 | 629-50-5                | 184             | 38.15                   | 0.014             |
| C16H34                 | 5,8-Diethyldodecane         | 24251-86-3              | 226             | 47.76                   | 0.067             |
| C16H34                 | 3-Methylpentadecane         | 2882-96-4               | 226             | 63.23                   | 0.115             |
| C16H34                 | n-Hexadecane                | 544-76-3                | 226             | 87.81                   | 0.264             |
| C17H36                 | n-Heptadecane               | 629-78-7                | 240             | 116.85                  | 0.046             |
| Olefins                |                             |                         |                 |                         |                   |
| C4H8                   | 2-Methyl-1-propene          | 115-11-7                | 56              | 5.95                    | 1.005             |
| C4H8                   | (E)-2-Butene                | 624-64-6                | 56              | 6.16                    | 0.001             |
| C4H8                   | 2-Butene                    | 107-01-7                | 56              | 6.26                    | 0.017             |
| C5H8                   | 1,3-Pentadiene              | 1574-41-0               | 68              | 8.44                    | 0.081             |
| C5H8                   | (E)-1,3-Pentadiene          | 2004-70-8               | 68              | 8.54                    | 0.101             |
| C5H8                   | (Z)-1,3-Pentadiene          | 1574-41-0               | 68              | 8.81                    | 0.009             |
| C6H8                   | 1,3-Cyclohexadiene          | 592-57-4                | 80              | 11.97                   | 0.094             |
| C6H10                  | (E)-2-Methyl-1,3-pentadiene | 926-54-5                | 82              | 13.06                   | 0.017             |
| C7H14                  | 1-Heptene                   | 592-76-7                | 98              | 15.70                   | 0.015             |
| C7H14                  | 2-Heptene                   | 592-77-8                | 98              | 16.10                   | 0.019             |
| C7H8                   | 1,3,5-Cycloheptatriene      | 544-25-2                | 92              | 18.43                   | 0.043             |
| C8H16                  | (E)-3-Octene                | 14919-01-8              | 112             | 19.53                   | 0.081             |
| C8H16                  | 2-Methyl-2-heptene          | 627-97-4                | 112             | 19.73                   | 0.044             |
| C8H16                  | (Z)-3-Octene                | 14850-22-7              | 112             | 19.83                   | 0.028             |
| C8H16                  | (E)-2-Octene                | 13389-42-9              | 112             | 19.93                   | 0.058             |
| C8H16                  | (Z)-2-Octene                | 7642-04-8               | 112             | 20.07                   | 0.022             |
| C8H16                  | 2-Octene                    | 111-67-1                | 112             | 20.30                   | 0.012             |
| C8H14                  | 2,5-Dimethyl-2,4-hexadiene  | 764-13-6                | 110             | 21.15                   | 0.021             |
| C9H18                  | (Z)-3-Nonene                | 20237-46-1              | 126             | 22.50                   | 0.033             |
| C9H18                  | 3-Nonene                    | 20063-77-8              | 126             | 22.86                   | 0.306             |
| C9H18                  | (E)-2-Nonene                | 6434-78-2               | 126             | 23.00                   | 0.108             |
| C9H18                  | (Z)-2-Nonene                | 6434-77-1               | 126             | 23.30                   | 0.227             |
| C9H18                  | 2-Nonene                    | 2216-38-8               | 126             | 23.60                   | 0.217             |
| C11H22                 | (E)-4-Methyl-4-decene       | 60366-66-7              | 154             | 30.77                   | 0.008             |

|                                                   |                              |            |     |       |       |
|---------------------------------------------------|------------------------------|------------|-----|-------|-------|
| C <sub>12</sub> H <sub>24</sub>                   | 1-Dodecene                   | 112-41-4   | 168 | 33.90 | 0.028 |
| C <sub>13</sub> H <sub>26</sub>                   | (Z)-5-Tridecene              | 25524-42-9 | 182 | 36.75 | 0.052 |
| C <sub>13</sub> H <sub>26</sub>                   | (E)-5-Tridecene              | 23051-84-5 | 182 | 37.14 | 0.022 |
| C <sub>13</sub> H <sub>26</sub>                   | (Z)-4-Tridecene              | 41446-54-2 | 182 | 37.69 | 0.009 |
| C <sub>13</sub> H <sub>26</sub>                   | 1-Tridecene                  | 2437-56-1  | 182 | 37.88 | 0.029 |
| C <sub>14</sub> H <sub>28</sub>                   | 1-Tetradecene                | 1120-36-1  | 196 | 43.81 | 0.036 |
| C <sub>15</sub> H <sub>30</sub>                   | 1-Pentadecene                | 13360-61-7 | 210 | 53.12 | 0.024 |
| <b>Cyclic hydrocarbons</b>                        |                              |            |     |       |       |
| <i>Cycloalkanes (naphthenes) and cycloalkenes</i> |                              |            |     |       |       |
| C <sub>5</sub> H <sub>10</sub>                    | Cyclopentane                 | 287-92-3   | 70  | 8.54  | 0.133 |
| C <sub>6</sub> H <sub>12</sub>                    | Ethylcyclobutane             | 4806-61-5  | 84  | 12.67 | 0.019 |
| C <sub>7</sub> H <sub>14</sub>                    | Methylcyclohexane            | 108-87-2   | 98  | 18.10 | 1.931 |
| <i>Arenes</i>                                     |                              |            |     |       |       |
| C <sub>6</sub> H <sub>6</sub>                     | Benzene                      | 71-43-2    | 78  | 12.61 | 0.019 |
| C <sub>7</sub> H <sub>8</sub>                     | Toluene                      | 108-88-3   | 92  | 17.07 | 0.032 |
| C <sub>7</sub> H <sub>7</sub> F                   | (Fluoromethyl)benzene        | 350-50-5   | 110 | 20.73 | 0.008 |
| C <sub>8</sub> H <sub>10</sub>                    | p-Xylene                     | 106-42-3   | 106 | 21.38 | 0.016 |
| C <sub>8</sub> H <sub>10</sub>                    | o-Xylene                     | 95-47-6    | 106 | 21.12 | 0.008 |
| C <sub>8</sub> H <sub>8</sub>                     | Styrene                      | 100-42-5   | 104 | 22.02 | 0.002 |
| C <sub>8</sub> H <sub>10</sub>                    | m-Xylene                     | 108-38-3   | 106 | 22.03 | 0.004 |
| C <sub>8</sub> H <sub>9</sub> F                   | p-Fluoroethylbenzene         | 459-47-2   | 124 | 22.18 | 0.024 |
| C <sub>8</sub> H <sub>9</sub> F                   | 3-Fluoro-o-xylene            | 443-82-3   | 124 | 24.28 | 0.026 |
| C <sub>9</sub> H <sub>12</sub>                    | Propylbenzene                | 103-65-1   | 120 | 24.93 | 0.005 |
| C <sub>9</sub> H <sub>12</sub> O                  | (Ethoxymethyl)benzene        | 539-30-0   | 136 | 28.69 | 0.017 |
| C <sub>11</sub> H <sub>16</sub>                   | Pentylbenzene                | 538-68-1   | 148 | 32.09 | 0.019 |
| C <sub>13</sub> H <sub>20</sub>                   | Heptylbenzene                | 1078-71-3  | 176 | 40.47 | 0.009 |
| <b>Oxygenated hydrocarbons</b>                    |                              |            |     |       |       |
| <i>Alcohols</i>                                   |                              |            |     |       |       |
| CH <sub>4</sub> O                                 | Methanol                     | 67-56-1    | 32  | 4.93  | 0.040 |
| C <sub>2</sub> H <sub>6</sub> O                   | Ethanol                      | 64-17-5    | 46  | 6.51  | 0.014 |
| C <sub>3</sub> H <sub>8</sub> O                   | Isopropyl Alcohol            | 67-63-0    | 60  | 8.06  | 0.013 |
| C <sub>4</sub> H <sub>10</sub> O                  | 1-Butanol                    | 71-36-3    | 74  | 12.86 | 0.089 |
| C <sub>4</sub> H <sub>10</sub> O <sub>2</sub>     | 1-Methoxy-2-propanol         | 107-98-2   | 90  | 14.30 | 0.005 |
| C <sub>6</sub> H <sub>6</sub> O                   | Phenol                       | 108-95-2   | 94  | 24.76 | 0.007 |
| C <sub>7</sub> H <sub>8</sub> O                   | 2-Methylphenol               | 95-48-7    | 108 | 26.36 | 0.003 |
| C <sub>7</sub> H <sub>8</sub> O                   | 3-Methylphenol               | 108-39-4   | 108 | 26.71 | 0.003 |
| C <sub>7</sub> H <sub>8</sub> O                   | 4-Methylphenol               | 106-44-5   | 108 | 26.91 | 0.004 |
| C <sub>9</sub> H <sub>12</sub> O                  | Benzenepropanol              | 122-97-4   | 136 | 35.57 | 0.021 |
| C <sub>13</sub> H <sub>28</sub> O                 | n-Tridecan-1-ol              | 112-70-9   | 200 | 67.13 | 0.031 |
| <i>Ethers and esters</i>                          |                              |            |     |       |       |
| C <sub>6</sub> H <sub>12</sub> O                  | Tetrahydro-3-methyl-2H-pyran | 26093-63-0 | 100 | 17.69 | 0.028 |
| C <sub>7</sub> H <sub>10</sub> O                  | 1-Methoxy-1,3-cyclohexadiene | 2161-90-2  | 110 | 23.18 | 0.018 |
| C <sub>5</sub> H <sub>6</sub> O <sub>2</sub>      | 5,6-Dihydro-2H-pyran-2-one   | 3393-45-1  | 98  | 25.11 | 0.514 |

|                                                |                                                 |            |     |        |        |
|------------------------------------------------|-------------------------------------------------|------------|-----|--------|--------|
| C <sub>6</sub> H <sub>10</sub> O <sub>2</sub>  | γ-Hexalactone                                   | 695-06-7   | 114 | 27.51  | 0.003  |
| C <sub>12</sub> H <sub>24</sub> O <sub>2</sub> | Isopropyl ester 3,5,5-trimethylhexanoic acid    | (406051)   | 200 | 33.64  | 0.019  |
| C <sub>8</sub> H <sub>14</sub> O <sub>2</sub>  | γ-Octalactone                                   | 104-50-7   | 142 | 34.59  | 0.008  |
| C <sub>11</sub> H <sub>20</sub> O <sub>3</sub> | Ethyl ester 2-acetylheptanoic acid              | 24317-94-0 | 200 | 38.73  | 0.064  |
| C <sub>9</sub> H <sub>16</sub> O <sub>2</sub>  | γ-Nonalactone                                   | 104-61-0   | 156 | 39.12  | 0.010  |
| C <sub>13</sub> H <sub>26</sub> O <sub>2</sub> | Butyl ester 3,5,5-trimethylhexanoic acid        | (406054)   | 214 | 42.78  | 0.030  |
| C <sub>12</sub> H <sub>26</sub> O <sub>2</sub> | 6,8-Doixatetradecane                            | (334828)   | 202 | 45.28  | 0.095  |
| C <sub>10</sub> H <sub>18</sub> O <sub>2</sub> | γ-Decalactone                                   | 706-14-9   | 170 | 45.98  | 0.010  |
| C <sub>13</sub> H <sub>18</sub> O <sub>2</sub> | 2-Tert-butyl-4-methylphenol acetate             | 6950-09-0  | 206 | 52.37  | 0.023  |
| C <sub>12</sub> H <sub>14</sub> O <sub>4</sub> | Diethyl phthalate                               | 84-66-2    | 222 | 58.23  | 0.062  |
| C <sub>12</sub> H <sub>22</sub> O <sub>2</sub> | γ-Dodecalactone                                 | 2305-05-7  | 198 | 73.95  | 0.009  |
| C <sub>16</sub> H <sub>32</sub> O <sub>2</sub> | Heptyl ester 3,5,5-trimethylhexanoic acid       | (406058)   | 256 | 95.55  | 16.153 |
| C <sub>17</sub> H <sub>34</sub> O <sub>2</sub> | 2-Ethylhexyl ester 3,5,5-trimethylhexanoic acid | (406822)   | 270 | 100.63 | 9.450  |
| C <sub>15</sub> H <sub>22</sub> O <sub>2</sub> | Octyl ester benzoic acid                        | 94-50-8    | 234 | 127.19 | 1.411  |
| <i>Aldehydes</i>                               |                                                 |            |     |        |        |
| C <sub>2</sub> H <sub>4</sub> O                | Acetaldehyde                                    | 75-07-0    | 44  | 5.28   | 0.060  |
| C <sub>3</sub> H <sub>4</sub> O                | 2-Propenal                                      | 107-02-8   | 56  | 7.29   | 0.006  |
| C <sub>3</sub> H <sub>6</sub> O                | n-Propanal                                      | 123-38-6   | 58  | 7.48   | 0.018  |
| C <sub>4</sub> H <sub>6</sub> O                | 2-Methyl-2-propenal                             | 78-85-3    | 70  | 9.71   | 0.004  |
| C <sub>4</sub> H <sub>8</sub> O                | 2-Methylpropanal                                | 78-84-2    | 72  | 9.78   | 0.008  |
| C <sub>4</sub> H <sub>8</sub> O                | n-Butanal                                       | 123-72-8   | 72  | 10.57  | 0.004  |
| C <sub>5</sub> H <sub>10</sub> O               | n-Pentanal                                      | 110-62-3   | 86  | 14.69  | 0.005  |
| C <sub>5</sub> H <sub>4</sub> O <sub>2</sub>   | Furfural                                        | 98-01-1    | 96  | 17.47  | <0.001 |
| C <sub>5</sub> H <sub>4</sub> O <sub>2</sub>   | 3-Furaldehyde                                   | 498-60-2   | 96  | 18.33  | 0.005  |
| C <sub>6</sub> H <sub>12</sub> O               | n-Hexanal                                       | 66-25-1    | 100 | 19.02  | 0.011  |
| C <sub>6</sub> H <sub>10</sub> O               | 2-Methyl-2-pentenal                             | 623-36-9   | 98  | 21.25  | 0.033  |
| C <sub>7</sub> H <sub>6</sub> O                | Benzaldehyde                                    | 100-52-7   | 106 | 24.13  | 0.023  |
| C <sub>8</sub> H <sub>16</sub> O               | 2-Ethylhexanal                                  | 123-05-7   | 128 | 25.63  | 0.030  |
| C <sub>8</sub> H <sub>16</sub> O               | n-Octanal                                       | 124-13-0   | 128 | 26.96  | 0.004  |
| C <sub>9</sub> H <sub>18</sub> O               | n-Nonanal                                       | 124-19-6   | 142 | 30.49  | 0.215  |
| C <sub>9</sub> H <sub>14</sub> O               | 5-(Methylenecyclopropyl)-pentanal               | (158491)   | 138 | 31.47  | 0.329  |
| C <sub>10</sub> H <sub>20</sub> O              | n-Decanal                                       | 112-31-2   | 156 | 33.72  | 0.099  |
| <i>Ketones</i>                                 |                                                 |            |     |        |        |
| C <sub>3</sub> H <sub>6</sub> O                | 2-Propanone                                     | 67-64-1    | 58  | 7.64   | 0.012  |
| C <sub>4</sub> H <sub>6</sub> O                | 2-Butenone                                      | 78-94-4    | 70  | 10.34  | 0.001  |
| C <sub>4</sub> H <sub>6</sub> O <sub>2</sub>   | 2,3-Butanedione                                 | 431-03-8   | 86  | 10.62  | 0.014  |
| C <sub>4</sub> H <sub>8</sub> O                | 2-Butanone                                      | 78-93-3    | 72  | 10.71  | 0.014  |
| C <sub>5</sub> H <sub>10</sub> O               | 2-Pentanone                                     | 107-87-9   | 86  | 13.71  | 0.035  |

|                                                |                                       |            |     |       |        |
|------------------------------------------------|---------------------------------------|------------|-----|-------|--------|
| C <sub>6</sub> H <sub>8</sub> O                | 3-Methyl-2-cyclopenten-1-one          | 2758-18-1  | 96  | 23.90 | 0.163  |
| C <sub>7</sub> H <sub>10</sub> O               | 2,3-Dimethyl-2-cyclopenten-1-one      | 1121-05-7  | 110 | 26.76 | 0.016  |
| C <sub>7</sub> H <sub>10</sub> O               | 3-Ethyl-2-cyclopenten-1-one           | 5682-69-9  | 110 | 28.04 | 0.663  |
| C <sub>7</sub> H <sub>8</sub> O <sub>3</sub>   | 3-Hydroxy-2,6-dimethyl-4H-pyran-4-one | 2298-99-9  | 140 | 32.17 | 0.333  |
| C <sub>10</sub> H <sub>20</sub> O              | 2-Decanone                            | 693-54-9   | 156 | 33.39 | 0.023  |
| C <sub>8</sub> H <sub>4</sub> O <sub>3</sub>   | 1,3-Isobenzofurandione                | 85-44-9    | 148 | 35.99 | 0.182  |
| C <sub>13</sub> H <sub>26</sub> O              | 3-Tridecanone                         | 1534-26-5  | 198 | 51.52 | 0.011  |
| <i>Carboxylic acids</i>                        |                                       |            |     |       |        |
| C <sub>2</sub> H <sub>4</sub> O <sub>2</sub>   | Acetic acid                           | 64-19-7    | 60  | 11.37 | 0.089  |
| C <sub>3</sub> H <sub>6</sub> O <sub>2</sub>   | n-Propanoic acid                      | 79-09-4    | 74  | 15.39 | 0.002  |
| C <sub>4</sub> H <sub>8</sub> O <sub>2</sub>   | n-Butanoic acid                       | 107-92-6   | 88  | 19.08 | 0.299  |
| C <sub>5</sub> H <sub>10</sub> O <sub>2</sub>  | 3-Methylbutanoic acid                 | 503-74-2   | 102 | 22.03 | 0.003  |
| C <sub>5</sub> H <sub>10</sub> O <sub>2</sub>  | n-Pentanoic acid                      | 109-52-4   | 102 | 23.00 | 0.009  |
| C <sub>6</sub> H <sub>12</sub> O <sub>2</sub>  | n-Hexanoic acid                       | 142-62-1   | 116 | 26.53 | 0.059  |
| C <sub>7</sub> H <sub>14</sub> O <sub>2</sub>  | n-Heptanoic acid                      | 111-14-8   | 130 | 29.96 | 0.010  |
| C <sub>8</sub> H <sub>16</sub> O <sub>2</sub>  | n-Octanoic acid                       | 124-07-2   | 144 | 32.97 | 0.123  |
| C <sub>9</sub> H <sub>18</sub> O <sub>2</sub>  | n-Nonanoic acid                       | 112-05-0   | 158 | 36.64 | 0.021  |
| C <sub>10</sub> H <sub>20</sub> O <sub>2</sub> | n-Decanoic acid                       | 334-48-5   | 172 | 41.78 | 0.083  |
| C <sub>12</sub> H <sub>24</sub> O <sub>2</sub> | n-Dodecanoic acid                     | 143-07-7   | 200 | 62.28 | 0.246  |
| C <sub>13</sub> H <sub>26</sub> O <sub>2</sub> | 2-Methyldodecanoic acid               | 2874-74-0  | 214 | 68.43 | 0.009  |
| <b>Heterocyclic compounds</b>                  |                                       |            |     |       |        |
| <i>Furans</i>                                  |                                       |            |     |       |        |
| C <sub>5</sub> H <sub>6</sub> O                | 2-Methylfuran                         | 534-22-5   | 82  | 10.31 | 0.002  |
| C <sub>5</sub> H <sub>6</sub> O                | 3-Methylfuran                         | 930-27-8   | 82  | 10.57 | 0.001  |
| C <sub>6</sub> H <sub>8</sub> O                | 2-Ethylfuran                          | 3208-16-0  | 96  | 14.50 | 0.006  |
| C <sub>9</sub> H <sub>14</sub> O               | 2-Pentylfuran                         | 3777-69-3  | 138 | 26.13 | 0.006  |
| <b>Nitrogenated compounds</b>                  |                                       |            |     |       |        |
| N <sub>2</sub>                                 | Nitrogen                              | 7727-37-9  | 28  | 1.62  | 0.718  |
| H <sub>3</sub> N                               | Ammonia                               | 7664-41-7  | 17  | 2.93  | 0.029  |
| C <sub>3</sub> H <sub>5</sub> N                | Propargylamine                        | 2450-71-7  | 55  | 9.46  | 0.007  |
| C <sub>12</sub> H <sub>15</sub> NO             | 5-Ethyl-5-methyl-2-phenyl-2-oxazoline | 91875-70-6 | 189 | 53.77 | 0.026  |
| <b>Sulfonated compounds</b>                    |                                       |            |     |       |        |
| H <sub>2</sub> S                               | Hydrogen sulfide                      | 7783-06-4  | 34  | 3.03  | 0.001  |
| COS                                            | Carbonyl sulfide                      | 463-58-1   | 60  | 3.51  | 0.002  |
| O <sub>2</sub> S                               | Sulfur dioxide                        | 7446-09-5  | 64  | 4.70  | 0.453  |
| CS <sub>2</sub>                                | Carbon disulfide                      | 75-15-0    | 76  | 7.84  | 0.004  |
| C <sub>2</sub> H <sub>6</sub> S <sub>2</sub>   | Dimethyl disulfide                    | 624-92-0   | 94  | 15.40 | <0.001 |
| <b>Inorganic compounds</b>                     |                                       |            |     |       |        |
| <i>Oxides</i>                                  |                                       |            |     |       |        |
| CO <sub>2</sub>                                | Carbon dioxide                        | 124-38-9   | 44  | 1.92  | 0.828  |

|                    |       |           |    |      |        |
|--------------------|-------|-----------|----|------|--------|
| H <sub>2</sub> O   | Water | 7732-18-5 | 18 | 3.21 | 60.420 |
| <i>Noble gases</i> |       |           |    |      |        |
| Ar                 | Argon | 7440-37-1 | 40 | 1.57 | 0.001  |

Note: <sup>1</sup>CAS/(NIST) – unique numerical identifier of chemical compounds included in the register Chemical Abstracts Service (<https://www.cas.org>) or NIST number (a unique number given to each spectrum in the NIST archive); <sup>2</sup>MW – nominal mass; <sup>3</sup>RT – retention time; <sup>4</sup>A – normalized area (the area ratio of the individual gas mixture components to the sum of the areas of all the components in the chromatogram).
